# Supplementary material for: MicroRNA Expression in Myocardial Tissue and Plasma of Patients with End-Stage Heart Failure during LVAD Support: Comparison of Continuous and Pulsatile Devices
Source: PLoS One. 2015 Oct 2;10(10):e0136404. doi: 10.1371/journal.pone.0136404 (PMC4592005; doi:10.1371/journal.pone.0136404)
Supplement: S4 File — (XLSX) [file pone.0136404.s004.xlsx]

## Sheet: Table A
Supplemental file 4. Table A. Q-PCR array analysis of miR expression in tissue in pf-LVAD supported patients (pre vs post)
			Avg	Avg
ProbeID	Annotation	logFC	pre-LVAD	post-LVAD	AvgHy3	P.Value	adj.P.Val	patient 1 post	patient 2 post	patient 3 post	patient 5 post	patient 6 post	patient 1 pre	patient 2 pre	patient 3 pre	patient 5 pre	patient 6 pre
17415	ebv-miR-BART10	0.0332086	0.250066	0.283275	7.04109	0.832642	0.999293	0.351405	-0.0599054	0.276383	0.313409	0.535083	0.34327	0.356192	0.211299	-0.198266	0.537837
27537	ebv-miR-BART13	0.00167281	0.225613	0.227285	7.31073	0.985458	0.999293	0.135434	0.482731	0.188275	0.135778	0.194208	0.14063	0.249812	0.442456	0.239527	0.055638
17358	ebv-miR-BART16	-0.0446231	0.25153	0.206907	6.86563	0.686625	0.999293	0.0912676	0.335917	0.343215	0.126711	0.137423	0.332492	0.0132351	0.46118	0.102372	0.34837
42522	ebv-miR-BART19-3p	-0.39273	2.09401	1.70128	9.51142	0.548468	0.999293	0.711144	3.40032	1.64202	1.72385	1.02907	1.86343	1.93821	3.7553	1.6894	1.22372
17532	ebv-miR-BART5	-0.0981088	-0.345228	-0.443337	6.31271	0.588258	0.999293	-0.618406	0.339992	-0.605632	-0.737591	-0.595048	-0.495443	-0.195716	-0.303372	-0.562066	-0.169545
17561	ebv-miR-BART6-3p	-0.261857	0.718327	0.45647	7.71296	0.692469	0.999293	-0.336976	2.16539	0.21702	0.422549	-0.185633	0.494517	0.446787	2.277	0.602848	-0.229511
17328	ebv-miR-BART8*	-0.220908	-0.643452	-0.864361	7.83877	0.402262	0.999293	-1.59839	0.443311	-1.44947	-0.452876	-1.26438	-1.10708	-0.154332	-0.629038	-0.328899	-0.99791
42906	ebv-miR-BHRF1-1	0.101618	-0.416603	-0.314984	6.3569	0.208699	0.999293	-0.242017	-0.191956	-0.398404	-0.332857	-0.409689	-0.49071	-0.337094	-0.274361	-0.359611	-0.621237
42951	ebv-miR-BHRF1-2	-0.0657378	-0.215504	-0.281242	8.13005	0.71764	0.999293	-0.533194	0.314963	-0.511499	-0.345335	-0.331146	-0.140334	-0.104518	-0.0917864	-0.585595	-0.155288
42782	hcmv-miR-UL148D	0.0133891	-0.70367	-0.690281	7.7127	0.917583	0.999293	-0.795938	-0.42362	-1.06738	-0.544812	-0.61965	-0.569452	-0.488651	-0.841521	-0.98002	-0.638708
147162	hsa-let-7a	0.256313	-0.845277	-0.588964	10.8429	0.60841	0.999293	-0.023862	-1.7914	-0.393567	-0.498224	-0.237764	-0.528612	-0.624986	-2.10188	-0.741137	-0.229765
42530	hsa-let-7a-2*	0.00611492	-0.276437	-0.270323	6.32969	0.911557	0.999293	-0.301061	-0.257601	-0.271593	-0.327091	-0.194266	-0.195885	-0.278071	-0.163614	-0.38585	-0.358768
17888	hsa-let-7a*	0.078489	-0.0201096	0.0583794	6.19836	0.495105	0.999293	0.339649	-0.27467	0.0489054	0.0319579	0.146055	0.0205847	0.0369106	-0.111392	-0.0707797	0.0241282
147165	hsa-let-7b	-0.0210529	0.318315	0.297262	11.8391	0.722254	0.999293	0.155764	0.338234	0.201011	0.426695	0.364606	0.350025	0.428798	0.202053	0.315364	0.295335
42769	hsa-let-7b*	0.0172645	-0.120924	-0.103659	6.61983	0.759178	0.999293	0.0315803	-0.232208	-0.21212	-0.0783545	-0.0271954	-0.133003	-0.122369	-0.167448	-0.196346	0.0145464
145820	hsa-let-7c	0.0656767	0.0989179	0.164595	11.2062	0.400702	0.999293	0.145647	0.114397	0.0828992	0.272957	0.207073	0.219723	0.229533	-0.0986696	0.030269	0.113735
145968	hsa-let-7d	0.134111	-0.379528	-0.245417	10.0849	0.634227	0.999293	0.0325464	-0.999465	-0.0428933	-0.251944	0.0346704	-0.138085	-0.2085	-0.869635	-0.531675	-0.149744
145633	hsa-let-7d*	0.0114504	0.0479396	0.05939	7.37047	0.941177	0.999293	-0.201595	0.510267	-0.0504342	0.15063	-0.111918	0.0248786	0.178633	0.378401	-0.103579	-0.238635
145846	hsa-let-7e	0.204287	-0.596529	-0.392242	9.60164	0.135073	0.999293	-0.163298	-0.707321	-0.289387	-0.559552	-0.241654	-0.423206	-0.580863	-0.830045	-0.657134	-0.491398
145840	hsa-let-7f-1*	0.0880948	-0.0846699	0.00342486	6.8094	0.273128	0.999293	0.10492	-0.0928512	-0.0242711	0.020706	0.00862037	-0.0768005	0.0208712	0.00139317	-0.110337	-0.258476
46438	hsa-let-7g	0.092942	-0.457019	-0.364077	10.8387	0.797798	0.999293	0.114726	-1.22874	-0.226469	-0.335201	-0.144699	-0.219408	-0.340573	-1.41948	-0.314625	0.00899514
9938	hsa-let-7i	-0.0658799	0.0936928	0.0278129	10.5228	0.646319	0.999293	-0.0236864	-0.245172	-0.00837656	0.232554	0.183745	0.17266	0.189175	-0.338243	0.386496	0.0583762
145746	hsa-let-7i*	0.0272538	-0.287185	-0.259931	6.16107	0.873204	0.999293	0.000906218	-0.813945	-0.255412	-0.0850167	-0.14619	-0.187961	-0.252182	-0.655207	-0.129582	-0.210994
10916	hsa-miR-1	0.310053	-1.09967	-0.789613	12.4784	0.67263	0.999293	0.0714199	-2.40781	-0.467201	-0.560058	-0.584414	-0.969509	-1.22305	-3.05611	-0.406586	0.15692
145943	hsa-miR-100	0.0329031	-0.406802	-0.373899	8.83051	0.848692	0.999293	-0.0447329	-0.785319	-0.67055	-0.368738	-0.000153264	-0.308474	-0.239558	-0.999599	-0.276204	-0.210173
31026	hsa-miR-101	-0.0404922	0.0495993	0.00910711	11.3504	0.902729	0.999293	0.183249	-0.741823	0.248129	0.185957	0.170024	0.209843	0.337922	-0.574989	-0.0742973	0.349517
17935	hsa-miR-101*	0.118728	0.122967	0.241695	6.15726	0.502684	0.999293	0.446407	-0.165859	0.414087	0.205155	0.308686	0.194955	0.352935	0.0384637	-0.0369647	0.0654473
10919	hsa-miR-103a	-0.194511	0.109583	-0.0849282	9.56771	0.306107	0.999293	0.124938	-0.489768	-0.0429184	-0.15552	0.138626	0.205105	0.16125	-0.392103	0.220863	0.352798
146223	hsa-miR-103a-2*	-0.0167161	-0.0777849	-0.094501	5.99657	0.202692	0.999293	-0.0333198	-0.0291052	-0.0893948	-0.185089	-0.135596	-0.0416431	-0.0181566	-0.0382715	-0.153405	-0.137448
46801	hsa-miR-106a	-0.153178	-0.485074	-0.638252	7.47552	0.629786	0.999293	-0.333847	-1.27587	-0.664577	-0.476812	-0.440156	-0.651436	-0.192344	-1.23808	0.00605726	-0.349566
19582	hsa-miR-106b	-0.172939	0.152915	-0.0200236	8.8634	0.213847	0.999293	0.0239041	-0.177784	0.0779392	-0.106056	0.0818792	0.0857321	0.358135	-0.0452186	0.233238	0.13269
17854	hsa-miR-106b*	-0.0889234	0.151533	0.0626094	6.69747	0.642531	0.999293	-0.114531	0.500626	-0.0926825	0.0541989	-0.0345643	0.091416	0.22534	0.633917	-0.0409859	-0.152023
10923	hsa-miR-107	-0.143806	-0.03513	-0.178935	8.7245	0.495867	0.999293	0.0234293	-0.67452	-0.0787129	-0.261131	0.0962575	0.0861547	0.0814607	-0.525738	-0.0308919	0.213364
13485	hsa-miR-10a	0.524831	-0.581458	-0.0566265	6.95695	0.219168	0.999293	0.976639	-1.08859	-0.394442	0.0747366	0.148526	-0.703611	-0.539813	-1.09574	-0.474925	-0.093196
10925	hsa-miR-10b	0.63362	-0.802773	-0.169154	6.62291	0.219406	0.999293	1.14079	-1.26214	-0.639102	-0.00827479	-0.0770335	-0.983272	-0.66958	-1.2833	-0.628737	-0.448979
46258	hsa-miR-1184	0.140024	-0.163013	-0.0229889	7.14998	0.0260403	0.999293	-0.163914	0.165828	-0.164814	0.0365648	0.0113908	-0.224134	-0.000643174	-0.194387	-0.196547	-0.199353
46345	hsa-miR-1207-3p	0.029562	1.14977	1.17933	6.42566	0.573716	0.999293	1.09412	1.14521	1.25681	1.15989	1.24062	1.2099	1.1598	1.24979	1.00658	1.12277
46806	hsa-miR-1227	0.0300293	0.544154	0.574184	6.04241	0.353133	0.999293	0.473038	0.565941	0.666611	0.579311	0.586018	0.528159	0.587139	0.603674	0.503037	0.498763
46222	hsa-miR-1228*	0.086981	1.00612	1.09311	6.25393	0.513314	0.999293	1.01397	1.18157	1.19052	0.980344	1.09912	1.10655	1.10761	1.30608	0.963473	0.546914
46624	hsa-miR-1236	-0.00774149	0.139529	0.131787	6.86376	0.954984	0.999293	-0.154886	0.492868	0.0166638	0.166506	0.137786	0.0642093	0.124103	0.367535	0.00714607	0.13465
42898	hsa-miR-124*	-0.00127812	-0.0875728	-0.0888509	6.19997	0.991244	0.999293	-0.373029	0.288269	-0.162301	-0.197305	0.000111492	-0.20046	0.108837	0.0800591	-0.0964919	-0.329809
46404	hsa-miR-1244	-0.0349096	1.00151	0.966599	6.03391	0.598927	0.999293	1.04107	1.02642	0.958884	0.948348	0.858275	0.909456	1.21781	1.10961	0.973365	0.797307
148642	hsa-miR-1246	-0.778338	-0.0789537	-0.857292	11.2617	0.296382	0.999293	-1.63368	0.484488	-1.08305	-0.556366	-1.49785	-0.619778	-0.706584	0.154702	2.17411	-1.39722
145977	hsa-miR-1247	-0.0835582	0.144643	0.0610853	6.52748	0.08054	0.999293	-0.0100512	-0.0674011	0.095554	0.0558164	0.231508	0.0344667	0.127618	0.0834569	0.185822	0.291854
46427	hsa-miR-1248	-0.0114489	-0.591119	-0.602568	6.38541	0.927875	0.999293	-0.332033	-0.820132	-0.475445	-0.757914	-0.627316	-0.565546	-0.639555	-0.751633	-0.71469	-0.284171
46210	hsa-miR-1249	-0.0482767	1.97395	1.92567	7.19491	0.464221	0.999293	1.92876	1.92173	1.93451	1.81403	2.02935	2.01315	2.07018	2.10747	1.80393	1.87504
46214	hsa-miR-1250	0.068634	1.12242	1.19105	6.11456	0.100708	0.999293	1.1441	1.2538	1.23758	1.14815	1.17164	1.19457	1.15852	1.12274	1.09348	1.04278
46380	hsa-miR-1255a	-0.0162108	-0.326949	-0.34316	7.68811	0.89778	0.999293	-0.52582	0.0254554	-0.191725	-0.463954	-0.559757	-0.242138	-0.391753	-0.0403886	-0.396165	-0.564302
17942	hsa-miR-125a-3p	0.00930953	0.849469	0.858778	6.52518	0.80046	0.999293	0.867834	0.936583	0.935068	0.760407	0.793998	0.854791	0.873999	1.00214	0.827693	0.688721
10928	hsa-miR-125a-5p	0.180604	-0.126735	0.0538696	10.9971	0.346325	0.999293	0.32504	-0.403601	0.220381	-0.00876614	0.136295	0.00322625	-0.0019443	-0.413861	-0.116763	-0.104331
30787	hsa-miR-125b	-0.0277797	-0.0779793	-0.105759	12.959	0.726267	0.999293	0.0509956	-0.145528	-0.176333	-0.154164	-0.103766	0.00619877	0.0505333	-0.39017	0.00479818	-0.0612569
145838	hsa-miR-125b-1*	-0.00766541	0.244905	0.23724	6.08153	0.933232	0.999293	0.102367	0.573014	0.0515837	0.333878	0.125355	0.239608	0.315232	0.202134	0.196442	0.27111
42845	hsa-miR-125b-2*	0.107809	-0.704199	-0.59639	6.05569	0.0337261	0.999293	-0.416006	-0.6431	-0.649261	-0.676634	-0.596949	-0.605076	-0.743453	-0.805151	-0.781269	-0.586047
4610	hsa-miR-126	-0.105266	-0.224976	-0.330242	12.235	0.845946	0.999293	0.432232	-1.66345	-0.148134	-0.263124	-0.00873938	0.0304672	-0.0740638	-1.62644	0.0787743	0.466385
33596	hsa-miR-126*	-0.126962	-0.417556	-0.544518	9.98857	0.813761	0.999293	0.296366	-1.93021	-0.379796	-0.458677	-0.25027	-0.152326	-0.358049	-1.77682	-0.266067	0.465487
145975	hsa-miR-1260	-0.0231756	-0.202063	-0.225238	14.9178	0.839502	0.999293	-0.128442	-0.110606	-0.315997	-0.20079	-0.370355	-0.0444035	-0.424684	-0.199675	-0.29477	-0.0467794
147791	hsa-miR-1260b	-0.167043	0.242085	0.075042	15.3384	0.169995	0.999293	-0.317188	0.239432	0.375745	0.00910721	0.0681132	-0.00889375	0.306943	0.286587	0.485023	0.140768
46732	hsa-miR-1264	0.11706	0.414401	0.531461	10.6229	0.146956	0.999293	0.473936	0.464165	0.768321	0.331833	0.619051	0.477591	0.399261	0.773926	0.133989	0.28724
46737	hsa-miR-1265	-0.0309113	0.132377	0.101466	7.03645	0.543563	0.999293	0.247252	0.000496001	0.240896	-0.116709	0.135396	0.298315	0.185724	0.138959	-0.12578	0.16467
46558	hsa-miR-1268/hsa-miR-1268b	0.397801	0.604364	1.00217	5.86461	0.0257078	0.999293	1.19308	0.799399	1.15574	0.730783	1.13182	0.843769	0.79036	0.489747	0.357881	0.540064
42829	hsa-miR-127-3p	0.0366137	0.0782779	0.114892	6.22285	0.78611	0.999293	-0.015921	0.161542	0.0236863	0.291443	0.113707	-0.148108	-0.080887	0.228488	0.606423	-0.214526
46752	hsa-miR-1270	0.0209386	0.509174	0.530113	5.95623	0.740118	0.999293	0.430264	0.694533	0.719675	0.427025	0.379066	0.302941	0.527729	0.692217	0.495253	0.52773
46627	hsa-miR-1271	0.108635	0.201516	0.310151	6.01642	0.265041	0.999293	0.434183	0.126145	0.371191	0.115673	0.503565	0.248865	0.25502	0.0631911	0.164121	0.276384
148263	hsa-miR-1273e	-0.0916608	-0.602537	-0.694198	6.71339	0.617545	0.999293	-0.929776	-0.218136	-0.787983	-0.573841	-0.961254	-0.564937	-0.741209	-0.424047	-0.599415	-0.683078
46620	hsa-miR-1275	-0.63403	0.960818	0.326788	11.869	0.426654	0.999293	-1.05973	2.42302	0.185431	0.64628	-0.561057	0.743789	0.824655	2.71426	0.895171	-0.373785
33902	hsa-miR-128	0.0178538	0.192056	0.209909	6.26715	0.871679	0.999293	0.453155	-0.0450229	0.284919	0.129599	0.226897	0.266737	0.288216	0.0274014	0.0935641	0.28436
148675	hsa-miR-1280	-0.0602489	0.0414921	-0.0187567	15.0379	0.51523	0.999293	-0.0179751	0.171715	0.0561221	-0.114829	-0.188817	0.105836	0.00745369	-0.0150955	-0.0273729	0.13664
46634	hsa-miR-1281	0.00102932	0.842621	0.84365	6.27091	0.985411	0.999293	0.754888	0.902172	0.862385	0.794733	0.904073	0.854564	0.95768	0.908408	0.790478	0.701974
46336	hsa-miR-1284	-0.0219288	-0.0405391	-0.0624679	6.57599	0.677623	0.999293	-0.0565562	-0.0243784	-0.0706839	-0.0499654	-0.110755	0.0487198	-0.0953337	-0.0724535	-0.136558	0.0529299
145981	hsa-miR-1285	-0.00641767	-0.547405	-0.553822	6.55805	0.924437	0.999293	-0.571509	-0.492049	-0.529267	-0.600291	-0.575996	-0.489889	-0.694274	-0.602775	-0.452064	-0.498022
42571	hsa-miR-129*	0.201147	-0.295786	-0.0946386	8.31766	0.626104	0.999293	0.583587	-1.28926	-0.0270112	-0.143674	0.403164	0.116133	-0.0574036	-1.02612	-0.735517	0.223981
46921	hsa-miR-1290	-0.887459	-0.00304297	-0.890502	10.7292	0.296044	0.999293	-1.76793	0.506256	-1.10913	-0.599941	-1.48177	-0.568009	-0.740931	0.182073	2.59349	-1.48184
46416	hsa-miR-1293	0.0653323	0.692758	0.75809	6.05085	0.131922	0.999293	0.635963	0.611159	0.981494	0.933683	0.628152	0.677528	0.547595	0.813151	0.834953	0.590563
46944	hsa-miR-1297	0.0890616	-0.807711	-0.71865	7.83575	0.843669	0.999293	0.184902	-1.81617	-0.663048	-0.824677	-0.474258	-0.676065	-0.866329	-1.93849	-0.65371	0.0960374
46381	hsa-miR-1298	-0.0657782	-0.172344	-0.238122	6.41054	0.832116	0.999293	-0.554536	0.717432	-0.53944	-0.504617	-0.309449	-0.123876	-0.332225	-0.000656575	-0.46019	0.0552295
46788	hsa-miR-1299	-0.0384647	-0.103697	-0.142162	6.72464	0.661437	0.999293	-0.232572	0.0815452	-0.109138	-0.239918	-0.210727	-0.0472875	-0.193141	0.0324758	-0.154169	-0.156365
46215	hsa-miR-1301	-0.000612977	0.596549	0.595936	6.27622	0.989963	0.999293	0.575599	0.650349	0.583855	0.587322	0.582554	0.492473	0.591275	0.716907	0.676448	0.505641
46479	hsa-miR-1304	-0.0305821	-0.535155	-0.565737	6.66193	0.784248	0.999293	-0.819631	-0.242229	-0.538962	-0.541835	-0.686029	-0.562395	-0.580895	-0.368075	-0.436606	-0.727806
42681	hsa-miR-1307	-0.164755	0.712263	0.547508	6.87059	0.0559853	0.999293	0.592076	0.716288	0.481391	0.422665	0.525121	0.792518	0.711196	0.829953	0.487799	0.739848
10138	hsa-miR-130a	-0.13631	0.369068	0.232758	10.196	0.620877	0.999293	0.283946	-0.455756	0.477438	0.515336	0.342828	0.552026	0.375368	-0.268598	0.587094	0.599451
10936	hsa-miR-130b	-0.250342	0.757255	0.506913	7.02212	0.148303	0.999293	0.406607	0.65995	0.39027	0.497471	0.580267	0.738469	0.760372	0.605319	1.22176	0.460351
46866	hsa-miR-1321	0.0283486	-0.24307	-0.214721	7.31496	0.841743	0.999293	-0.362903	-0.0119146	-0.234428	-0.22601	-0.238349	-0.132769	-0.308246	0.0833821	-0.562601	-0.295113
146137	hsa-miR-133a	0.100077	0.277161	0.377238	13.4074	0.607311	0.999293	0.301904	-0.204125	0.748642	0.667779	0.371988	0.309049	0.24876	0.134897	0.329946	0.363151
146160	hsa-miR-133b	0.0813191	0.245707	0.327026	13.8951	0.663854	0.999293	0.303041	-0.220906	0.698573	0.603217	0.251204	0.275166	0.208671	0.0695185	0.374541	0.300638
42839	hsa-miR-135a	-0.0478629	-0.436303	-0.484166	6.98461	0.878387	0.999293	-1.03381	-0.959122	-0.125576	-0.100186	-0.202133	-0.279833	-0.459815	-1.05721	-0.292655	-0.0920029
10943	hsa-miR-136	0.145728	0.0942969	0.240025	8.26032	0.0233792	0.999293	0.0874406	-0.0857502	0.226614	0.675815	0.296006	-0.0915881	-0.241275	0.238712	0.490518	0.0751179
42512	hsa-miR-136*	0.118616	-0.343882	-0.225266	6.11344	0.245977	0.999293	-0.0745534	-0.671115	-0.287907	0.0618779	-0.154631	-0.292949	-0.476128	-0.606417	-0.0178752	-0.326043
42872	hsa-miR-138-1*	0.231103	-0.349377	-0.118273	9.3312	0.391532	0.999293	0.225505	-0.881339	-0.100294	-0.0824037	0.247166	-0.0461179	-0.174066	-0.634415	-0.676973	-0.215311
145677	hsa-miR-139-5p	0.0179381	0.333032	0.35097	7.75257	0.934427	0.999293	0.540918	-0.295621	0.640953	0.507212	0.361386	0.34282	0.469785	0.287472	0.205943	0.359137
42630	hsa-miR-140-3p	-0.0702843	0.451998	0.381713	9.16412	0.280217	0.999293	0.422005	0.299393	0.213336	0.512736	0.461095	0.429957	0.591229	0.194207	0.542269	0.502327
4700	hsa-miR-140-5p	0.140563	-0.422185	-0.281622	7.69221	0.759885	0.999293	0.415614	-1.42944	-0.342899	-0.087125	0.0357385	-0.255129	-0.165108	-1.62511	0.124843	-0.190425
145798	hsa-miR-142-5p	-0.214965	-0.574252	-0.789217	7.19145	0.104615	0.999293	-1.09509	-0.82419	-1.29835	0.0598231	-0.788279	-1.04804	-0.702877	-1.11956	0.677242	-0.678028
13177	hsa-miR-143	-0.0990072	-0.264122	-0.363129	12.4758	0.771671	0.999293	-0.102925	-1.17519	-0.178958	-0.343503	-0.0150763	-0.222879	-0.129739	-1.09096	0.0138239	0.109142
46467	hsa-miR-143*	-0.0175598	0.207416	0.189856	7.59862	0.770271	0.999293	0.13101	0.149791	0.15721	0.210842	0.300428	0.22842	0.234546	0.295709	0.123751	0.154653
29802	hsa-miR-144	-1.21186	-1.22632	-2.43818	9.36647	0.00970379	0.999293	-3.2697	-1.31178	-2.47107	-2.68254	-2.45581	-1.27297	0.166743	-1.9253	-1.94333	-1.15674
42641	hsa-miR-145	0.0189683	-0.0246778	-0.00570955	10.7791	0.910224	0.999293	0.0852363	-0.442983	0.0721657	0.0715271	0.185506	0.0361003	0.0766046	-0.401411	0.0170351	0.148281
31867	hsa-miR-145*	0.147364	-0.642827	-0.495464	6.70035	0.548409	0.999293	-0.0269527	-1.14094	-0.567373	-0.493471	-0.248582	-0.569025	-0.493336	-1.16727	-0.516177	-0.468325
146072	hsa-miR-1469	-0.0026557	-0.527228	-0.529884	8.69518	0.992387	0.999293	-1.24005	0.675704	-1.20535	-0.146612	-0.73311	-0.98778	-0.151608	-0.429412	-0.215942	-0.851399
10952	hsa-miR-146a	0.238959	-0.201333	0.0376264	6.8389	0.176717	0.999293	0.390733	-0.154295	-0.438447	0.429055	-0.0389143	-0.360659	-0.189113	-0.428916	0.3899	-0.417876
42461	hsa-miR-146b-3p	-0.0911785	-0.7683	-0.859479	6.3363	0.555062	0.999293	-0.95513	-0.479493	-0.9712	-0.793164	-1.09841	-0.75327	-0.952039	-0.682396	-0.580768	-0.873028
10306	hsa-miR-146b-5p	-0.267306	0.00311783	-0.264188	7.3372	0.39629	0.999293	-0.0803741	-0.501463	-0.591773	0.0789353	-0.226266	-0.386039	-0.500622	-0.565758	1.40851	0.0595022
10955	hsa-miR-148a	0.0675099	-0.39886	-0.33135	6.69413	0.74694	0.999293	0.180761	-1.04577	-0.493439	-0.297997	-0.000309513	-0.409537	-0.565409	-0.910884	-0.120137	0.0116658
19585	hsa-miR-148b	-0.0783936	0.364904	0.286511	8.05001	0.326378	0.999293	0.488336	-0.0236746	0.300374	0.333876	0.333642	0.353764	0.267234	0.311266	0.469113	0.423145
42810	hsa-miR-149	0.0899173	0.228868	0.318785	6.37369	0.228693	0.999293	0.401961	0.253982	0.364545	0.097571	0.475867	0.243836	0.301562	0.175437	0.174881	0.248623
42486	hsa-miR-149*	-0.0380894	-0.177832	-0.215921	8.73236	0.866874	0.999293	-0.709343	0.553487	-0.4243	-0.0452589	-0.454192	-0.352806	-0.0778475	0.190995	-0.136802	-0.5127
145678	hsa-miR-150	0.315157	-0.488976	-0.173819	8.13481	0.154205	0.999293	-0.238048	-0.515395	-0.0413803	0.0537187	-0.127988	-0.425377	-0.235037	-0.456286	-0.3862	-0.941978
17463	hsa-miR-151-3p	0.0554747	0.695671	0.751146	7.90028	0.643835	0.999293	0.726669	0.91938	0.698412	0.687909	0.723357	0.713779	0.774465	1.04695	0.525072	0.418083
11260	hsa-miR-151-5p	0.0813892	-0.201416	-0.120027	8.21096	0.779689	0.999293	0.272256	-0.933514	0.0428131	-0.14213	0.160441	-0.0508056	-0.142494	-0.823218	-0.274858	0.284296
17676	hsa-miR-152	-0.124062	0.618033	0.493971	8.52551	0.237592	0.999293	0.537687	0.363351	0.362456	0.717415	0.488945	0.623387	0.669885	0.414894	0.562976	0.819023
145857	hsa-miR-154	0.052869	-0.18757	-0.134701	5.76944	0.401173	0.999293	-0.137035	-0.190683	-0.293934	0.0693353	-0.121188	-0.131976	-0.267577	-0.168902	-0.037128	-0.332266
10964	hsa-miR-155	-0.237077	1.20262	0.965543	7.66724	0.554979	0.999293	0.465683	2.03201	0.750098	1.0355	0.544432	1.16797	1.01933	1.9461	1.2185	0.661202
27720	hsa-miR-15a	0.000589216	-0.265453	-0.264863	9.89976	0.998915	0.999293	0.325623	-1.38796	0.0149324	-0.360215	0.0833001	-0.136878	-0.115473	-1.16855	-0.0956495	0.18929
17280	hsa-miR-15b	-0.0446388	-0.712238	-0.756877	8.32358	0.909707	0.999293	-0.339204	-1.71202	-0.465249	-0.79164	-0.476269	-0.667177	-0.521538	-1.52642	-0.541461	-0.304593
10967	hsa-miR-16	0.0110196	-1.10287	-1.09185	10.3228	0.987333	0.999293	-0.296459	-2.67932	-0.716918	-1.07057	-0.695973	-0.979748	-0.801637	-2.76641	-0.685867	-0.280682
46777	hsa-miR-17	-0.195693	-0.25739	-0.453083	8.36795	0.439191	0.999293	-0.274372	-0.911755	-0.431398	-0.346395	-0.301495	-0.398057	-0.0213441	-0.863466	0.0969223	-0.101004
19588	hsa-miR-17*	0.055547	0.0306795	0.0862265	6.57803	0.701465	0.999293	0.14359	-0.20634	0.11259	0.210732	0.17056	-0.0426603	0.178645	-0.0557035	0.301867	-0.228752
42865	hsa-miR-181a	-0.0545435	0.730301	0.675757	9.69525	0.63316	0.999293	0.423026	1.01607	0.697147	0.582871	0.659672	0.639928	0.732282	0.966225	0.752296	0.560772
17928	hsa-miR-181a-2*	-0.0496344	0.186609	0.136975	6.23207	0.49585	0.999293	0.308155	0.16082	0.116292	-0.0292911	0.128898	0.144333	0.329999	0.0677438	0.120628	0.270343
10972	hsa-miR-181b	0.0280968	0.548545	0.576641	7.70589	0.650776	0.999293	0.414102	0.739736	0.506248	0.499742	0.72338	0.548166	0.58149	0.540142	0.51029	0.562635
145636	hsa-miR-181d	0.0806171	0.0513217	0.131939	7.61286	0.384955	0.999293	0.266978	0.0598737	0.0330186	-0.0496747	0.349499	0.112993	0.161415	-0.247056	0.0799577	0.149299
46810	hsa-miR-1827	0.0553544	-0.604336	-0.548982	9.27349	0.549852	0.999293	-0.431341	-0.569291	-0.517017	-0.603862	-0.623398	-0.558313	-0.804853	-0.647686	-0.649407	-0.361424
17953	hsa-miR-183*	-0.123559	-0.163601	-0.287161	6.27339	0.220283	0.999293	-0.500807	0.0087725	-0.437778	-0.200688	-0.305302	-0.288861	-0.103073	-0.101531	0.0210216	-0.345564
42902	hsa-miR-185	-0.310118	0.284854	-0.0252645	8.49086	0.0504708	0.999293	-0.128955	0.120102	-0.143734	0.0272454	-0.000980769	0.362491	0.602543	0.355249	0.0124028	0.0915835
18739	hsa-miR-186	-0.0745503	0.420862	0.346312	8.11065	0.327216	0.999293	0.420458	0.229946	0.405836	0.192729	0.482592	0.516372	0.484352	0.571594	0.0686937	0.463301
42614	hsa-miR-186*	-0.0250387	0.383794	0.358755	5.99069	0.655221	0.999293	0.424033	0.291302	0.332962	0.429056	0.316423	0.353837	0.461255	0.457271	0.340683	0.305923
145670	hsa-miR-18b	-0.234188	-0.215173	-0.44936	6.19598	0.180087	0.999293	-0.341471	-0.738415	-0.448904	-0.34805	-0.369961	-0.318434	-0.0478699	-0.577606	0.0576246	-0.189578
27536	hsa-miR-190	0.154012	-0.412335	-0.258323	7.48666	0.695646	0.999293	0.399142	-1.35465	-0.157432	-0.153749	-0.0249307	-0.248118	-0.517173	-1.40541	-0.210962	0.319982
148687	hsa-miR-1908	-0.151316	-0.51924	-0.670556	9.48546	0.603824	0.999293	-1.36578	0.450789	-1.20578	-0.378516	-0.853494	-0.757822	-0.324783	-0.446243	-0.309509	-0.757841
146180	hsa-miR-1909	0.0665097	-0.295811	-0.229301	6.28776	0.751695	0.999293	-0.712303	0.610242	-0.550148	-0.0082673	-0.486029	-0.546512	-0.153536	-0.15015	-0.153965	-0.474891
10985	hsa-miR-191	-0.174008	0.267871	0.0938633	8.90453	0.10613	0.999293	0.298213	-0.169718	0.0602712	0.299459	-0.0189083	0.341003	0.240736	0.00433343	0.592017	0.161266
146103	hsa-miR-1913	0.0598441	0.644268	0.704112	7.01405	0.332093	0.999293	0.745026	0.466182	0.772063	0.695144	0.842143	0.680269	0.604394	0.680571	0.501506	0.754597
146091	hsa-miR-1914	-0.102205	-0.262679	-0.364884	5.6863	0.351873	0.999293	-0.544093	-0.347525	-0.377995	-0.228551	-0.326256	-0.298797	-0.455929	-0.450435	0.173444	-0.281678
146068	hsa-miR-1915	-0.00565617	0.101102	0.095446	6.09787	0.927318	0.999293	-0.0809428	0.197088	0.0588288	0.338214	-0.0359579	-0.0923318	0.0320462	0.260002	0.349435	-0.0436402
10986	hsa-miR-193a-3p	-0.0723012	-0.410723	-0.483024	9.17981	0.777712	0.999293	-0.512431	-1.26727	-0.302827	-0.170154	-0.162442	-0.536222	-0.300233	-0.701858	-0.0869779	-0.428322
46443	hsa-miR-193a-5p	-0.0161081	0.391784	0.375676	7.29284	0.803756	0.999293	0.290493	0.261756	0.331647	0.622623	0.371863	0.266631	0.448817	0.341507	0.444103	0.457864
10987	hsa-miR-193b	0.142036	0.0237194	0.165756	8.32955	0.280462	0.999293	0.000711962	-0.0424138	0.0220952	0.537556	0.31083	-0.0394343	0.184034	-0.115791	0.177666	-0.0878778
42962	hsa-miR-193b*	0.131928	-0.291982	-0.160054	6.40762	0.212608	0.999293	-0.197875	0.0282198	-0.421189	-0.00125012	-0.208176	-0.347831	-0.179623	-0.237592	-0.124777	-0.570086
13148	hsa-miR-195	0.0922336	-0.486632	-0.394398	10.0532	0.823305	0.999293	0.00210512	-1.36911	-0.524314	-0.488211	0.407542	-0.2844	-0.151875	-1.68908	-0.388948	0.0811476
42723	hsa-miR-195*	0.0678102	-0.291067	-0.223257	5.92046	0.520082	0.999293	-0.267873	-0.0384878	-0.292288	-0.327738	-0.189897	-0.290679	-0.257103	-0.0956574	-0.277241	-0.534654
42538	hsa-miR-196a*	-0.00385703	0.191104	0.187247	7.46845	0.957324	0.999293	0.272409	0.160578	0.08359	0.3122	0.107459	0.406271	0.161865	0.183025	0.347486	-0.143127
145889	hsa-miR-196b	0.0227962	1.12277	1.14556	6.04125	0.559545	0.999293	1.08588	1.09289	1.24056	1.2126	1.09587	1.1534	1.1261	1.22597	1.07773	1.03063
42783	hsa-miR-197	0.0560078	0.176545	0.232553	7.93692	0.595057	0.999293	0.466843	-0.043139	0.2611	0.195875	0.282088	0.331035	0.233904	0.0718503	-0.0724672	0.318405
146165	hsa-miR-1973	0.113966	1.08457	1.19853	10.3853	0.824064	0.999293	0.735189	2.57779	1.13294	1.12004	0.426716	1.80962	1.38832	2.10093	0.127033	-0.0030523
146140	hsa-miR-1976	-0.0552996	0.0439662	-0.0113334	6.50849	0.421534	0.999293	-0.143536	0.0709468	0.0126396	-0.0120064	0.0152888	0.123233	0.18021	0.0354372	-0.0904059	-0.0286439
10995	hsa-miR-199a-3p/hsa-miR-199b-3p	0.178698	-0.864523	-0.685825	9.36178	0.622369	0.999293	-0.0728884	-1.55826	-0.972794	-0.563738	-0.261442	-0.727391	-0.841724	-2.11115	-0.194181	-0.448172
29562	hsa-miR-199a-5p	0.0926453	-0.436235	-0.343589	9.93935	0.548611	0.999293	-0.358586	-0.527458	-0.56334	-0.269656	0.00109337	-0.527496	-0.419771	-0.706526	0.0191052	-0.546485
19591	hsa-miR-199b-5p	0.0858313	-0.734593	-0.648762	8.30014	0.845475	0.999293	0.0683315	-1.86413	-0.746959	-0.490838	-0.210211	-0.612593	-0.64432	-1.95561	-0.321142	-0.1393
10997	hsa-miR-19a	-0.0792182	-0.0925865	-0.171805	9.21056	0.788767	0.999293	-0.0115754	-0.978894	-0.050708	0.0950597	0.0870945	-0.126763	0.0934908	-0.674864	0.182668	0.0625361
10998	hsa-miR-19b	-0.0789967	0.0933394	0.0143426	10.2166	0.61097	0.999293	-0.0728177	-0.325174	0.116568	0.318989	0.0341481	0.0278422	0.287972	-0.109328	0.293641	-0.0334308
11004	hsa-miR-203	0.0381379	0.326708	0.364845	6.05377	0.515197	0.999293	0.467286	0.243725	0.456827	0.339549	0.31684	0.353913	0.406151	0.315343	0.304623	0.253509
11005	hsa-miR-204	-0.0330624	0.316202	0.28314	5.98512	0.430527	0.999293	0.375181	0.251835	0.234096	0.106022	0.448566	0.485311	0.328506	0.279614	0.148797	0.338782
145996	hsa-miR-205*	0.0745014	-0.0362245	0.0382769	9.08172	0.287666	0.999293	0.0374427	-0.0690608	0.171907	-0.0656468	0.116742	0.0831496	-0.0304557	0.107113	-0.35404	0.0131105
5730	hsa-miR-208a	-0.00043727	0.904513	0.904076	10.14	0.997429	0.999293	1.08769	0.706909	1.04945	0.484554	1.19178	1.23282	1.06169	1.09841	0.095706	1.03394
42555	hsa-miR-208b	-0.258781	0.88468	0.625898	13.1616	0.0601354	0.999293	0.60587	0.929291	0.786913	0.553187	0.254229	1.00631	1.08991	1.13252	0.470576	0.72408
145845	hsa-miR-20a	-0.113824	-0.690201	-0.804025	8.04821	0.793506	0.999293	-0.392646	-1.86465	-0.755013	-0.586873	-0.420939	-0.803803	-0.556259	-1.83995	-0.0855109	-0.165485
42640	hsa-miR-20b	-0.172819	-0.50629	-0.67911	7.18695	0.595669	0.999293	-0.368322	-1.38489	-0.528439	-0.619941	-0.493954	-0.636407	-0.458092	-1.27731	-0.191848	0.0322031
17882	hsa-miR-20b*	0.0105474	0.27616	0.286708	6.03941	0.688836	0.999293	0.250928	0.254569	0.293543	0.323364	0.311134	0.175391	0.298439	0.238282	0.315182	0.353509
147512	hsa-miR-21	-0.628659	0.132234	-0.496425	9.10352	0.191293	0.999293	-0.223483	-1.21978	-0.606733	-0.15754	-0.274588	0.112559	-0.281802	-1.23846	1.66729	0.401585
42524	hsa-miR-21*	-0.45844	0.0669521	-0.391488	6.13195	0.122907	0.999293	-0.465862	-0.212666	-0.421843	-0.336436	-0.520634	-0.0481716	-0.301185	-0.309119	0.941584	0.051652
145852	hsa-miR-210	-0.416833	1.02611	0.609274	8.45596	0.0591042	0.999293	0.545687	0.592948	0.340305	0.546862	1.02057	1.27359	1.08844	0.942575	0.996577	0.82935
146179	hsa-miR-2113	-0.163546	-0.0738263	-0.237373	5.87512	0.59719	0.999293	-0.64495	0.559916	-0.379444	-0.137624	-0.58476	-0.247158	-0.185639	0.614853	-0.201182	-0.350005
146044	hsa-miR-2115	0.0533054	0.341659	0.394965	6.34988	0.290165	0.999293	0.415896	0.220024	0.497649	0.385645	0.45561	0.361684	0.333347	0.382343	0.306168	0.324755
146161	hsa-miR-2115*	-0.0646059	0.454203	0.389597	9.33153	0.739516	0.999293	0.297473	0.0187147	0.524755	0.43037	0.676675	0.633843	0.545146	0.484554	-0.10335	0.710824
146010	hsa-miR-2116	0.00736886	-0.20436	-0.196991	7.66495	0.951802	0.999293	-0.418884	-0.0541985	-0.112509	-0.198911	-0.200454	-0.132684	-0.358862	0.12229	-0.304617	-0.347928
11014	hsa-miR-214	0.0136142	0.180822	0.194436	9.50495	0.926395	0.999293	-6.44563e-05	0.431136	-0.0111764	0.180581	0.371704	0.100341	0.221153	0.257937	0.407185	-0.0825066
145822	hsa-miR-214*	0.0849517	-0.168589	-0.0836369	6.18349	0.209026	0.999293	0.0502898	-0.275964	-0.209479	-0.0497542	0.0667228	-0.0952586	-0.189705	-0.325821	-0.0572738	-0.174884
11018	hsa-miR-218	0.24125	-0.16986	0.0713894	6.60068	0.34009	0.999293	0.0885858	-0.689911	0.128143	0.255664	0.574465	-0.191967	-0.191567	-0.72515	0.15345	0.105934
42509	hsa-miR-219-5p	0.0310263	0.0523606	0.0833869	6.02956	0.736201	0.999293	0.220042	-0.222007	0.170587	0.0643044	0.184008	0.0915666	0.0732529	-0.0264027	-0.0303138	0.1537
11020	hsa-miR-22	-0.298872	0.704931	0.406059	13.8271	0.0108933	0.999293	0.333458	0.534257	0.422231	0.502153	0.238196	0.766142	0.785304	0.81068	0.563363	0.599164
42532	hsa-miR-22*	-0.0288081	0.191235	0.162427	9.07993	0.913817	0.999293	0.688202	-0.726963	0.180984	0.376605	0.293306	0.471867	0.190657	-0.340373	0.143062	0.490962
11022	hsa-miR-221	-0.832669	0.548452	-0.284217	9.50952	0.093859	0.999293	0.223584	-0.399223	-0.566456	0.31384	-0.992831	0.380014	1.13516	0.126232	0.224062	0.876787
11023	hsa-miR-222	-0.749392	0.635232	-0.11416	9.60139	0.0397585	0.999293	0.19186	0.0783621	-0.469686	0.213621	-0.584956	0.506237	1.18087	0.469025	0.242761	0.77727
11024	hsa-miR-223	-0.593639	-0.880044	-1.47368	7.62042	0.232752	0.999293	-1.45925	-1.54514	-1.64572	-1.50004	-1.21826	-1.47628	-1.4492	-1.85545	0.538136	-0.157418
42460	hsa-miR-223*	0.041596	1.26823	1.30983	6.00922	0.466759	0.999293	1.25535	1.35801	1.39549	1.26268	1.27761	1.28953	1.38765	1.40886	1.21852	1.0366
42566	hsa-miR-224	0.0531628	-0.528852	-0.475689	6.61327	0.807218	0.999293	-0.143774	-1.04433	-0.538116	-0.353024	-0.299199	-0.582372	-0.472802	-1.07644	-0.40045	-0.112197
146163	hsa-miR-224*	-0.0849701	-0.0934755	-0.178446	6.85731	0.745124	0.999293	-0.519915	0.933491	-0.547351	-0.459018	-0.299434	-0.410741	0.0946148	0.0416066	-0.134656	-0.0582025
148247	hsa-miR-2355-3p	-0.0506533	-0.234845	-0.285498	6.70991	0.445557	0.999293	-0.274859	-0.274074	-0.293205	-0.363618	-0.221734	-0.119544	-0.30957	-0.281391	-0.141974	-0.321744
42744	hsa-miR-23a	-0.142987	0.283917	0.14093	12.5628	0.0414659	0.999293	0.124206	0.15158	-0.0227399	0.211562	0.240041	0.288729	0.298596	0.0285941	0.520894	0.282771
42638	hsa-miR-23a*	-0.0967478	0.979545	0.882798	6.5803	0.165791	0.999293	0.823498	1.00189	1.01287	0.721703	0.854032	0.940475	0.921473	1.03249	0.925232	1.07805
145841	hsa-miR-23b	-0.00488287	-0.211749	-0.216632	12.9299	0.98897	0.999293	0.247998	-0.980238	-0.0806526	-0.264255	-0.00601214	-0.0497545	-0.102788	-1.17594	-0.0138532	0.283588
148217	hsa-miR-23c	0.0572649	-0.0739262	-0.0166613	10.132	0.851603	0.999293	0.528205	-0.588336	0.296864	-0.413358	0.0933186	0.287463	0.250158	-0.626316	-0.552254	0.271318
17506	hsa-miR-24	-0.121769	0.189397	0.0676287	12.858	0.656827	0.999293	0.411911	-0.544981	0.194252	0.0623235	0.214638	0.350038	0.285555	-0.523782	0.323541	0.511635
146043	hsa-miR-24-1*	0.0210425	-0.0554833	-0.0344408	8.26842	0.954581	0.999293	0.619286	-1.00813	0.144393	-0.12705	0.199299	0.233689	0.142691	-0.81534	-0.169493	0.331036
42950	hsa-miR-24-2*	-0.00159227	-0.258473	-0.260065	6.92249	0.996008	0.999293	0.343847	-1.06399	-0.271557	-0.326457	0.0178307	-0.160069	-0.0759676	-0.978244	-0.0816272	0.00354233
42682	hsa-miR-25	-0.0882131	-0.0296482	-0.117861	7.69347	0.288468	0.999293	0.0438392	-0.213139	-0.168086	-0.189789	-0.0621313	-0.0651371	0.0892319	-0.168561	0.000886849	-0.00466171
42929	hsa-miR-25*	0.0566581	-0.21709	-0.160431	7.42655	0.691212	0.999293	-0.373694	0.240059	-0.277801	-0.163474	-0.227247	-0.297396	-0.17609	0.01496	-0.0876567	-0.539266
147198	hsa-miR-26a	0.0758476	0.00842692	0.0842746	9.59693	0.78818	0.999293	0.481797	-0.644901	0.250147	0.119423	0.214906	0.224393	0.181628	-0.549496	-0.0626155	0.248226
146008	hsa-miR-26b	0.174549	-0.953963	-0.779414	10.3066	0.75245	0.999293	0.00606766	-2.10382	-0.644661	-0.703744	-0.450919	-0.656051	-0.914928	-2.51378	-0.600291	-0.0847677
42523	hsa-miR-26b*	-0.00584376	0.346032	0.340188	5.93215	0.918907	0.999293	0.448961	0.196488	0.314851	0.367426	0.373216	0.522621	0.262938	0.218894	0.220054	0.505653
46483	hsa-miR-27a	-0.0727178	-0.448171	-0.520889	10.1307	0.883049	0.999293	0.0821837	-1.88678	-0.413179	-0.425274	0.0386055	-0.390152	-0.371016	-1.68288	-0.0186529	0.221851
147199	hsa-miR-27b	-0.0474551	0.00690431	-0.0405508	11.1922	0.878423	0.999293	0.476592	-0.755395	0.128358	-0.281517	0.229208	0.221663	0.139087	-0.728391	-0.0996797	0.501842
42823	hsa-miR-27b*	0.0650154	0.428451	0.493467	6.65723	0.498308	0.999293	0.852716	0.339237	0.501717	0.413463	0.360201	0.569068	0.564344	0.464599	0.211817	0.332429
145714	hsa-miR-28-3p	-0.0408138	0.361753	0.320939	6.68216	0.535709	0.999293	0.425116	0.179152	0.306454	0.357515	0.336458	0.40593	0.402837	0.432031	0.35355	0.214416
146049	hsa-miR-28-5p	0.0216228	-0.19254	-0.170917	6.99841	0.941069	0.999293	0.300023	-0.961911	-0.136225	-0.128916	0.0724462	-0.0540635	-0.0391836	-0.845323	-0.240906	0.216778
147898	hsa-miR-2861	0.084241	0.402977	0.487218	5.9064	0.158298	0.999293	0.632777	0.0543266	0.591977	0.824174	0.332837	0.446463	0.0722868	0.499481	0.629228	0.367427
146100	hsa-miR-296-5p	-0.0240917	1.24073	1.21664	7.09138	0.644017	0.999293	1.1425	1.11266	1.29464	1.27	1.26338	1.15113	1.09505	1.37232	1.15136	1.43378
46264	hsa-miR-298	-0.0202853	-0.26635	-0.286635	6.52807	0.894018	0.999293	-0.427059	0.165805	-0.201199	-0.430941	-0.539782	-0.279322	-0.297717	0.203557	-0.496082	-0.462186
148633	hsa-miR-299-5p	-0.0443874	-0.589303	-0.63369	9.62191	0.838151	0.999293	-1.33908	0.335244	-0.834571	-0.300932	-1.02911	-1.01547	-0.258909	-0.52471	-0.576444	-0.570978
11039	hsa-miR-29a	-0.154225	0.0994925	-0.054732	13.1121	0.596224	0.999293	0.254582	-0.70451	0.0531638	-0.0568531	0.179957	0.38186	0.319001	-0.581056	-0.103418	0.481076
145638	hsa-miR-29a*	0.0213976	0.342481	0.363879	7.34045	0.911074	0.999293	0.674875	-0.142454	0.316235	0.488319	0.48242	0.556742	0.500392	-0.0961412	0.259213	0.492202
11040	hsa-miR-29b	-0.396186	0.126515	-0.269671	12.7486	0.305025	0.999293	0.0334791	-1.01593	-0.157258	-0.404611	0.195968	0.400445	0.506391	-0.745665	-0.181881	0.653285
17810	hsa-miR-29b-1*	-0.0146773	0.19313	0.178452	6.80386	0.896012	0.999293	0.138313	-0.696468	0.819974	0.758962	-0.128519	0.272197	-0.593838	0.562556	0.556875	0.167858
42792	hsa-miR-29b-2*	0.0286636	0.0442155	0.0728791	6.70803	0.850256	0.999293	0.357439	-0.451949	0.126649	0.185894	0.146362	0.208344	0.0320655	-0.191376	-0.03382	0.205864
11041	hsa-miR-29c	-0.110744	0.280854	0.17011	12.509	0.63309	0.999293	0.45946	-0.308256	0.33234	0.0361259	0.330879	0.534722	0.553206	-0.0982276	-0.0956472	0.510216
14300	hsa-miR-29c*	0.0226646	0.372874	0.395538	8.36591	0.899861	0.999293	0.72294	-0.0303214	0.386402	0.353529	0.545141	0.606745	0.558494	0.233933	-0.0836393	0.548836
42513	hsa-miR-300	0.0259494	-0.97658	-0.950631	7.34625	0.885544	0.999293	-1.1358	-0.558069	-0.928162	-0.950175	-1.18095	-0.801969	-1.22705	-0.844846	-0.852763	-1.15628
13143	hsa-miR-301a	-0.180177	0.228401	0.0482238	7.29072	0.523091	0.999293	0.387613	-0.559578	0.225178	-0.182155	0.370061	0.40811	0.444136	-0.363652	0.16981	0.483599
147203	hsa-miR-302a	-0.0759314	0.232545	0.156613	7.72972	0.7488	0.999293	-0.195658	0.5245	0.209768	0.283402	-0.038945	0.251815	-0.103971	0.827469	0.132347	0.0550639
11043	hsa-miR-302b	0.0649006	1.34408	1.40898	6.58464	0.317024	0.999293	1.49885	1.29294	1.58144	1.22744	1.44423	1.35552	1.43535	1.47632	1.18847	1.26474
11045	hsa-miR-302c*	0.0128514	0.254631	0.267483	6.69811	0.81446	0.999293	0.127512	0.411097	0.227338	0.252874	0.318593	0.14665	0.274621	0.35216	0.307205	0.19252
27838	hsa-miR-302d	0.292873	0.336948	0.629821	5.82348	0.148995	0.999293	0.894246	0.29377	0.949683	0.326202	0.685205	0.44339	0.532895	0.229181	0.21303	0.266245
45764	hsa-miR-302e	0.170677	-0.169166	0.00151064	6.14811	0.141036	0.999293	0.204642	-0.226318	0.0664921	-0.194755	0.157491	-0.12514	-0.0369857	-0.179738	-0.376809	-0.127159
146086	hsa-miR-30a	-0.0375873	0.26735	0.229762	10.8939	0.891431	0.999293	0.557717	-0.527553	0.439594	0.269722	0.409332	0.503757	0.382245	-0.209685	0.0467434	0.613688
19595	hsa-miR-30a*	0.0324635	0.618442	0.650906	7.88219	0.71318	0.999293	0.861174	0.491725	0.651716	0.682509	0.567405	0.821191	0.681159	0.683995	0.364147	0.54172
146112	hsa-miR-30b	-0.0503264	-0.325031	-0.375358	11.7383	0.908409	0.999293	0.356419	-1.62485	-0.129872	-0.359461	-0.119025	-0.076505	-0.303455	-1.26618	-0.248766	0.269748
42923	hsa-miR-30c	-0.0401181	-0.120724	-0.160842	11.9546	0.886186	0.999293	0.363436	-0.928126	-0.00597879	-0.189965	-0.0435757	0.0419927	-0.116454	-0.719435	-0.103435	0.293712
42702	hsa-miR-30c-1*	0.0196223	-0.202674	-0.183052	5.98703	0.926895	0.999293	-0.304251	0.247323	-0.397234	-0.189514	-0.271583	-0.334522	-0.279277	0.217525	-0.00209235	-0.615005
46626	hsa-miR-30c-2*	0.0890971	0.396805	0.485902	6.01256	0.330062	0.999293	0.610789	0.380139	0.541288	0.394093	0.503199	0.398052	0.551948	0.536499	0.27891	0.218614
19596	hsa-miR-30d	-0.0725955	0.759139	0.686543	11.3041	0.562514	0.999293	0.849789	0.424517	0.889709	0.544339	0.724364	1.01356	0.857651	0.706055	0.374357	0.844074
17853	hsa-miR-30d*	0.067112	0.585848	0.65296	6.24	0.326634	0.999293	0.798557	0.542618	0.721078	0.603591	0.598955	0.61493	0.677143	0.727399	0.460939	0.448827
28191	hsa-miR-30e	0.094196	0.019184	0.11338	11.061	0.818423	0.999293	0.526205	-0.981822	0.404851	0.156226	0.46144	0.226607	0.20438	-0.785715	-0.113763	0.564411
145676	hsa-miR-30e*	0.0863602	0.268224	0.354584	9.68427	0.75086	0.999293	0.800737	-0.463329	0.544522	0.416584	0.474405	0.521044	0.292981	-0.190865	0.0845814	0.633377
147820	hsa-miR-3133	0.229132	-1.25749	-1.02836	7.48104	0.320189	0.999293	-0.610845	-1.64715	-1.03676	-1.14894	-0.698086	-0.928399	-1.0976	-1.33456	-1.737	-1.18988
147988	hsa-miR-3135	0.0925419	-0.249055	-0.156513	6.13155	0.422209	0.999293	-0.372419	0.129018	-0.165251	-0.0825805	-0.291332	-0.240079	-0.236965	-0.0430584	-0.379467	-0.345705
147923	hsa-miR-3142	0.0182189	-0.123215	-0.104996	5.88538	0.781851	0.999293	0.0630384	-0.0567163	-0.269557	0.0639755	-0.325723	-0.156913	-0.134142	-0.153042	0.160682	-0.332661
147904	hsa-miR-3148	-0.0258271	-0.309984	-0.335811	6.48874	0.818269	0.999293	-0.560158	-0.0423979	-0.213183	-0.415689	-0.447627	-0.320104	-0.414759	-0.0635306	-0.354442	-0.397086
147806	hsa-miR-3149	-0.0646312	-0.336617	-0.401248	7.37325	0.7502	0.999293	-0.695732	0.0145861	-0.257955	-0.453454	-0.613684	-0.28445	-0.649278	-0.0140672	-0.372866	-0.362422
147739	hsa-miR-3161	0.0354968	-0.311335	-0.275838	6.41108	0.7163	0.999293	-0.317265	-0.0218042	-0.251792	-0.338343	-0.449985	-0.227933	-0.303199	-0.135382	-0.570841	-0.319318
147891	hsa-miR-3175	-0.0253951	0.521646	0.496251	8.03091	0.834728	0.999293	0.382382	0.467303	0.280774	0.705741	0.645054	0.353205	0.327269	0.497198	1.05624	0.374315
147595	hsa-miR-3178	0.000178299	-0.151542	-0.151364	7.0956	0.999293	0.999293	-0.635954	0.224162	-0.263145	-0.0835185	0.00163571	-0.804804	0.0376662	-0.307563	0.650453	-0.333463
147667	hsa-miR-3182	-0.836359	-0.505409	-1.34177	11.1127	0.0557442	0.999293	-2.17566	-0.730046	-1.35556	-1.18512	-1.26246	-1.34982	-0.82762	-0.347709	0.654317	-0.656211
147805	hsa-miR-3183	0.049755	-0.479962	-0.430207	6.31689	0.286247	0.999293	-0.478776	-0.415655	-0.401217	-0.409419	-0.445969	-0.397504	-0.464182	-0.539434	-0.539365	-0.459326
148000	hsa-miR-3195	-0.0180793	-0.230251	-0.24833	6.10988	0.835974	0.999293	-0.365496	0.0121156	-0.36187	-0.173488	-0.352912	-0.320181	-0.143355	-0.0801277	-0.0985822	-0.509007
147817	hsa-miR-3196	-0.0364544	-0.54729	-0.583744	8.3137	0.91608	0.999293	-1.12226	0.603703	-0.854938	-0.815388	-0.729837	-0.525842	-0.50637	-0.148351	-0.696028	-0.859858
11053	hsa-miR-32	0.0779586	-0.886295	-0.808336	7.45696	0.885519	0.999293	-0.0478763	-2.31235	-0.446219	-0.889401	-0.345836	-0.730837	-0.742336	-1.94322	-0.778889	-0.236194
29575	hsa-miR-32*	-0.0662486	-0.314958	-0.381206	8.28143	0.787352	0.999293	-0.745721	0.194124	-0.337509	-0.412854	-0.60407	-0.326506	-0.575947	0.185709	-0.228559	-0.629486
147851	hsa-miR-3201	-0.0664635	-0.343953	-0.410416	6.0869	0.536165	0.999293	-0.602837	-0.223139	-0.380803	-0.432722	-0.41258	-0.507179	-0.378629	-0.327456	-0.0164329	-0.490067
146158	hsa-miR-3202	-0.168802	-0.630417	-0.799219	7.80981	0.595516	0.999293	-1.72941	0.326847	-1.37785	0.396655	-1.61234	-1.25506	-0.65097	-0.781239	0.627856	-1.09268
27533	hsa-miR-320a	-0.236238	0.861678	0.62544	9.69445	0.185101	0.999293	0.328016	0.86693	0.351697	0.887234	0.693323	0.74477	0.685439	0.979553	1.22552	0.673105
46324	hsa-miR-320b	-0.27388	0.894143	0.620263	9.67974	0.0848688	0.999293	0.331857	0.819343	0.356644	0.897063	0.696407	0.714472	0.727516	0.961986	1.2574	0.809338
46228	hsa-miR-320c	-0.261301	0.888833	0.627533	9.37397	0.0918188	0.999293	0.356664	0.809116	0.375033	0.932173	0.664678	0.730422	0.76334	0.98183	1.2636	0.704975
46870	hsa-miR-320d	-0.20542	0.826806	0.621385	9.16984	0.245253	0.999293	0.352641	0.859077	0.332286	0.897211	0.665711	0.706418	0.710838	0.973586	1.20207	0.54112
147691	hsa-miR-320e	-0.227194	0.755098	0.527904	9.29058	0.174479	0.999293	0.26539	0.724147	0.269434	0.842847	0.537701	0.616429	0.664068	0.874778	1.20321	0.417008
42457	hsa-miR-323-5p	0.0429959	1.38595	1.42894	5.96709	0.256462	0.999293	1.41049	1.51305	1.47354	1.29756	1.45008	1.3305	1.47758	1.50309	1.31522	1.30334
145708	hsa-miR-324-3p	0.0138941	0.38846	0.402354	6.47539	0.588976	0.999293	0.466936	0.346032	0.460699	0.317194	0.420908	0.415699	0.421944	0.452799	0.271246	0.380611
42693	hsa-miR-326	-0.0740748	0.166805	0.0927305	6.47365	0.60219	0.999293	-0.0773577	0.569866	0.015834	0.0582389	-0.102929	0.0555711	0.247667	0.513452	0.0842025	-0.0668666
145640	hsa-miR-328	0.126925	-0.00783437	0.119091	6.4391	0.0794623	0.999293	0.147483	0.0894153	0.155904	0.095311	0.107341	0.0906757	0.0762172	0.099656	-0.116127	-0.189594
42887	hsa-miR-331-3p	0.0420275	0.0386621	0.0806896	8.2304	0.837435	0.999293	0.377506	-0.493658	0.196418	-0.147729	0.470912	0.275217	0.152009	-0.297441	-0.134323	0.197848
11065	hsa-miR-335	-0.503095	-1.18953	-1.69262	6.75082	0.166932	0.999293	-1.35354	-2.19415	-1.84263	-1.38546	-1.68733	-1.51714	-0.947065	-2.08445	-0.590354	-0.808625
145745	hsa-miR-335*	-0.0147184	-0.0025304	-0.0172488	9.43634	0.786359	0.999293	-0.289336	0.113513	0.0276566	0.0457404	0.016182	-0.19865	-0.0322489	0.121283	-0.0198515	0.116815
42673	hsa-miR-337-3p	0.00471704	0.268624	0.273341	6.48793	0.961325	0.999293	0.295075	0.0404047	0.299666	0.354652	0.376907	0.194086	0.188748	0.207528	0.61661	0.136148
17944	hsa-miR-337-5p	0.0511373	0.0452285	0.0963658	6.45962	0.765448	0.999293	0.136896	-0.411196	0.121359	0.325084	0.309685	-0.08591	-0.14088	-0.209781	0.721917	-0.0592022
42592	hsa-miR-338-3p	-0.19452	0.18081	-0.0137098	8.03951	0.438314	0.999293	0.636577	-0.707355	-0.0574614	0.0310193	0.0286714	0.299648	0.0923472	-0.197107	0.0172998	0.691861
17825	hsa-miR-338-5p	-0.0295169	0.138775	0.109258	5.72028	0.701254	0.999293	0.183824	0.105599	0.0572044	0.0338321	0.165831	0.159467	0.166044	0.10915	0.285126	-0.0259104
42739	hsa-miR-339-5p	-0.0965779	-0.109612	-0.20619	6.47334	0.503237	0.999293	-0.0162142	-0.500989	-0.337515	-0.127564	-0.0486654	-0.0232373	-0.040265	-0.374941	0.202592	-0.312207
145859	hsa-miR-33a	0.141922	-0.0649273	0.0769943	7.61788	0.540015	0.999293	0.313478	-0.660404	0.0232918	0.223751	0.484855	-0.161401	0.00495938	-0.279084	0.100923	0.00996623
145950	hsa-miR-33b	0.104742	-0.208181	-0.103439	6.19309	0.479606	0.999293	0.0795386	-0.468901	-0.277179	0.165417	-0.0160725	-0.237661	-0.173597	-0.236977	0.0947821	-0.487452
29872	hsa-miR-340	-0.00294041	0.0712305	0.0682901	7.94862	0.976563	0.999293	-0.0325236	0.278433	-0.106168	0.098259	0.103449	0.153965	0.0141999	0.0724318	0.190911	-0.0753557
32884	hsa-miR-342-3p	0.0455462	-0.138255	-0.0927085	7.44165	0.812226	0.999293	0.211243	-0.603042	-0.143825	0.11956	-0.0474783	-0.0094534	-0.123822	-0.713319	0.00501925	0.150301
27217	hsa-miR-34a	0.0104628	-0.653152	-0.64269	8.14872	0.95779	0.999293	0.0375264	-1.12825	-1.16553	-0.822536	-0.134658	-0.408301	-0.616157	-1.5242	-0.51224	-0.204867
148420	hsa-miR-3607-3p	0.266744	0.348455	0.615198	9.5473	0.0466528	0.999293	0.707148	0.507075	0.694879	0.841879	0.325011	0.612598	0.422131	0.45656	0.243855	0.00712733
148418	hsa-miR-3607-5p	0.300904	0.0593561	0.36026	8.2074	0.110743	0.999293	0.648385	-0.080675	0.451855	0.577571	0.204164	0.296328	0.154707	-0.0886363	-0.0144673	-0.0511507
145865	hsa-miR-361-3p	-0.0281725	0.730523	0.70235	7.4777	0.532833	0.999293	0.593027	0.600006	0.716521	0.917369	0.684829	0.585214	0.622906	0.834441	0.812666	0.797387
14301	hsa-miR-361-5p	-0.0374589	0.402656	0.365197	8.55788	0.69655	0.999293	0.522411	0.154137	0.429101	0.352326	0.368011	0.564034	0.499512	0.317834	0.186974	0.444925
148465	hsa-miR-3611	-0.172366	-0.568426	-0.740792	7.08976	0.473258	0.999293	-1.06213	-0.199399	-0.747087	-0.637357	-1.05798	-0.685642	-0.787748	-0.424446	0.0731734	-1.01747
148493	hsa-miR-3613-3p	-0.129195	0.0698058	-0.059389	13.0335	0.573238	0.999293	-0.696998	0.34014	-0.00782335	0.217825	-0.150089	-0.0352841	-0.201833	0.477105	0.289977	-0.180937
147334	hsa-miR-3613-5p	-0.0668008	0.177378	0.110577	5.91081	0.589228	0.999293	0.292664	-0.0340019	0.12594	0.136402	0.0318803	0.161521	0.131921	-0.0316981	0.132354	0.492791
148413	hsa-miR-3614-3p	0.153104	1.07545	1.22856	6.73694	0.235337	0.999293	1.26963	1.00031	1.33549	1.11349	1.42387	1.18977	1.18266	1.14546	0.936313	0.923069
148125	hsa-miR-3618	0.0777287	-0.470596	-0.392867	6.1002	0.354507	0.999293	-0.368036	-0.260697	-0.52475	-0.415987	-0.394865	-0.588815	-0.523216	-0.485407	-0.288675	-0.466866
17893	hsa-miR-362-3p	0.105155	-0.524554	-0.4194	5.9064	0.680596	0.999293	-0.0284408	-1.05352	-0.433696	-0.359459	-0.22188	-0.489902	-0.35114	-1.06246	-0.24071	-0.478564
42503	hsa-miR-362-5p	-0.072709	0.699818	0.627109	6.41807	0.179322	0.999293	0.663319	0.55087	0.628349	0.594095	0.698909	0.569587	0.698495	0.691151	0.744395	0.79546
148317	hsa-miR-3621	-0.266049	-0.650963	-0.917012	7.57449	0.230605	0.999293	-1.25826	-0.397971	-1.19515	-0.81203	-0.921642	-0.931076	-0.692862	-0.54865	-0.140581	-0.941646
148132	hsa-miR-3622a-3p	0.0319566	-0.0658806	-0.033924	6.73631	0.80048	0.999293	0.206819	-0.393219	-0.114797	-0.0267284	0.158306	0.22277	-0.0396424	-0.284461	-0.388812	0.160743
11077	hsa-miR-363	-0.148459	0.0912693	-0.0571893	6.29904	0.397417	0.999293	-0.225591	-0.282297	0.340929	-0.0543337	-0.0646533	-0.14162	0.0469879	-0.0225917	0.0525382	0.521032
27544	hsa-miR-363*	-0.0131349	-0.0247043	-0.0378392	7.28538	0.928562	0.999293	0.150782	-0.479148	0.184451	-0.231632	0.186352	0.167243	0.0140965	-0.179989	-0.261383	0.136511
148481	hsa-miR-3646	-0.0818949	0.256705	0.17481	9.84692	0.516032	0.999293	0.0329936	0.403986	0.195422	0.148189	0.0934589	0.284772	0.147808	0.578496	0.0582001	0.214248
148269	hsa-miR-3647-3p	0.137332	0.368673	0.506005	8.67873	0.111023	0.999293	0.687258	0.304657	0.360573	0.761064	0.416472	0.479099	0.41962	0.23192	0.57266	0.140068
148319	hsa-miR-3647-5p	0.127394	-0.346905	-0.219511	5.95322	0.403111	0.999293	0.136747	-0.664314	-0.336945	-0.043288	-0.189753	-0.32148	-0.308343	-0.613461	-0.114832	-0.376406
11078	hsa-miR-365	0.113008	-0.69092	-0.577912	9.04459	0.731604	0.999293	-0.213821	-1.57264	-0.577287	-0.27003	-0.255779	-0.707511	-0.670961	-1.50815	-0.407292	-0.160681
148327	hsa-miR-3651	0.101244	-0.18151	-0.0802663	6.16547	0.584988	0.999293	0.112885	-0.532793	0.0304836	-0.172857	0.16095	-0.141334	-0.208066	-0.550314	0.0806926	-0.0885292
148377	hsa-miR-3653	0.126715	0.813546	0.940261	8.64529	0.34512	0.999293	0.82937	1.09122	0.822859	1.11562	0.842232	0.784534	0.800891	1.118	0.894708	0.469595
148379	hsa-miR-3654	-0.0155507	0.390026	0.374476	9.00549	0.925452	0.999293	0.170268	0.67232	0.208506	0.67704	0.144244	0.352688	0.334693	0.749173	0.553192	-0.0396137
148228	hsa-miR-3656	-0.226248	-0.087221	-0.313469	8.38395	0.378752	0.999293	-0.928223	0.591269	-0.525737	-0.0672806	-0.637371	-0.32708	0.0560572	0.24099	-0.024829	-0.381244
148597	hsa-miR-3663-5p	-0.15272	-0.245575	-0.398295	6.26261	0.400621	0.999293	-0.546715	-0.0193676	-0.494842	-0.500741	-0.42981	-0.104503	-0.461532	-0.181501	-0.110718	-0.369622
148206	hsa-miR-3664-5p	-0.00337616	0.82709	0.823713	5.979	0.962534	0.999293	0.726957	0.83256	0.904302	0.755009	0.89974	0.862869	0.946352	0.901929	0.768882	0.655416
148264	hsa-miR-3665	-0.0391429	-0.259451	-0.298594	6.04416	0.550271	0.999293	-0.388977	-0.14526	-0.404058	-0.194557	-0.360116	-0.297384	-0.149759	-0.222499	-0.364866	-0.262744
148234	hsa-miR-3667-5p	0.00877023	-0.685275	-0.676505	8.7008	0.960408	0.999293	-0.856495	-0.382966	-0.653723	-0.648114	-0.841228	-0.550864	-0.792527	-0.205176	-0.92592	-0.951891
148214	hsa-miR-3675-3p	-0.0910067	0.171791	0.0807846	7.23473	0.236757	0.999293	-0.0613417	0.1427	0.0953309	0.105496	0.121738	0.236766	0.11722	0.20162	0.0354424	0.267909
148410	hsa-miR-3676	-0.00416262	0.145944	0.141782	9.17506	0.949608	0.999293	0.0778878	0.211132	0.135827	0.135131	0.14893	0.202716	0.0887755	0.30297	0.000958539	0.134301
148038	hsa-miR-3679-3p	-0.0580758	1.71654	1.65846	8.65031	0.449831	0.999293	1.53936	1.44238	1.78492	1.82035	1.7053	1.72122	1.48619	2.03037	1.70129	1.64363
148599	hsa-miR-3680	0.0588613	-0.273907	-0.215046	7.02075	0.732051	0.999293	-0.379515	-0.381128	-0.234441	-0.159981	0.0798362	-0.242713	-0.224114	0.0629416	-0.66307	-0.302579
148032	hsa-miR-3685	-0.0808785	-0.670395	-0.751274	9.03466	0.774382	0.999293	-0.977551	-0.407432	-0.857925	-0.809036	-0.704424	-0.503272	-0.833536	0.0641067	-1.15066	-0.928618
148156	hsa-miR-3686	-0.0554765	-0.0062044	-0.0616809	10.9256	0.725489	0.999293	-0.317785	0.212536	-0.0546683	-0.0390625	-0.109425	0.10179	-0.00356468	0.338033	-0.0953702	-0.37191
148085	hsa-miR-3687	-0.396608	-0.337575	-0.734184	6.49547	0.0276284	0.999293	-1.12719	-0.271444	-0.947917	-0.433564	-0.890801	-0.805509	-0.260958	-0.249724	0.132231	-0.503917
148077	hsa-miR-3690	-0.0239166	-0.416307	-0.440224	6.21384	0.757796	0.999293	-0.458959	-0.439556	-0.431675	-0.355736	-0.515195	-0.446035	-0.386254	-0.505041	-0.506084	-0.238123
145844	hsa-miR-374a	0.0370274	-0.70472	-0.667692	7.94497	0.940561	0.999293	0.0909495	-2.06378	-0.588154	-0.551718	-0.225761	-0.530156	-0.703449	-1.99427	-0.436663	0.140941
148098	hsa-miR-374b	0.0848194	-0.0968196	-0.0120003	8.85558	0.792848	0.999293	0.511005	-0.943589	0.187534	-0.0568797	0.241929	0.130338	0.00297294	-0.714724	-0.139985	0.2373
148430	hsa-miR-374c	0.00475606	-0.171559	-0.166803	8.65367	0.988852	0.999293	0.322793	-1.16179	0.0182647	-0.136077	0.122799	0.0336306	-0.129855	-0.891138	-0.240537	0.370104
146009	hsa-miR-376a	0.0636126	-0.283501	-0.219888	6.12233	0.407246	0.999293	-0.174473	-0.398785	-0.387842	0.166205	-0.304547	-0.454825	-0.561953	-0.320601	0.154377	-0.234503
42629	hsa-miR-376c	0.127947	0.0214471	0.149394	6.95638	0.150564	0.999293	0.104568	-0.184803	0.0555014	0.452053	0.319652	-0.142652	-0.133721	-0.135239	0.489479	0.0293676
11091	hsa-miR-377	0.108756	-0.0426711	0.0660853	7.1332	0.362767	0.999293	-0.0075229	-0.174169	-0.0752864	0.395598	0.191806	-0.306303	-0.306354	-0.0145654	0.590124	-0.176256
148668	hsa-miR-378	0.40322	0.58186	0.98508	12.1397	0.0429285	0.999293	0.509265	0.951267	1.3533	1.10362	1.00795	0.394951	0.53494	1.24917	0.269562	0.460675
11092	hsa-miR-378*	0.431016	0.0271535	0.458169	7.24067	0.0189639	0.999293	0.379458	0.159815	0.726643	0.565528	0.459401	-0.0525946	0.03733	0.453094	-0.216439	-0.0856226
11105	hsa-miR-378/hsa-miR-378c/hsa-miR-378d	0.354642	0.590761	0.945403	11.6633	0.0440275	0.999293	0.507235	0.852401	1.36115	1.03665	0.969581	0.405313	0.565149	1.19801	0.249111	0.536222
147530	hsa-miR-378b	0.348951	0.504714	0.853665	9.71351	0.0865913	0.999293	0.487258	0.710293	1.1742	1.0307	0.865874	0.363739	0.484633	1.10931	0.110907	0.454984
147755	hsa-miR-378c	0.342455	0.615658	0.958113	11.2638	0.110403	0.999293	0.503885	0.870509	1.23665	1.13886	1.04066	0.321227	0.564129	1.33508	0.21603	0.641818
145832	hsa-miR-381	0.0652204	-0.252326	-0.187106	5.79806	0.692693	0.999293	-0.19891	-0.568876	-0.272633	0.134944	-0.0300539	-0.291603	-0.48734	-0.351843	0.487681	-0.618526
145643	hsa-miR-382	-0.0103658	0.154079	0.143713	5.92826	0.892541	0.999293	0.110438	0.11167	0.148309	0.268553	0.0795968	0.102287	-0.0480745	0.241101	0.508192	-0.0331091
148216	hsa-miR-3907	0.0885265	-0.204017	-0.115491	6.15359	0.131525	0.999293	0.0214957	-0.111238	-0.131045	-0.195615	-0.161051	-0.180675	-0.188407	-0.179111	-0.369885	-0.102008
148361	hsa-miR-3911	0.00479988	0.176275	0.181075	6.27917	0.94273	0.999293	0.0739661	0.222505	0.267875	0.104494	0.236535	0.194157	0.0899692	0.40803	0.117384	0.0718355
148495	hsa-miR-3915	-0.1539	-0.411814	-0.565714	7.13423	0.529031	0.999293	-0.940574	0.0709943	-0.636062	-0.600418	-0.722512	-0.59314	-0.627211	-0.0911226	-0.158997	-0.588602
148049	hsa-miR-3924	-0.0144181	0.0867568	0.0723386	6.47874	0.669367	0.999293	0.0382842	0.093348	0.158714	-0.0412352	0.112582	0.150278	0.0406543	0.20651	-0.0236225	0.0599642
148064	hsa-miR-3926	0.0570982	-0.221536	-0.164438	6.3907	0.470423	0.999293	-0.337986	0.0756244	-0.00277681	-0.278706	-0.278345	-0.241878	-0.238885	-0.0386368	-0.362121	-0.226158
148265	hsa-miR-3935	0.0630546	-0.551166	-0.488111	7.16211	0.621365	0.999293	-0.374219	-0.216708	-0.522527	-0.639461	-0.687642	-0.357179	-0.631648	-0.25859	-0.871041	-0.637372
148285	hsa-miR-3941	0.0679233	-0.367972	-0.300048	7.74609	0.528523	0.999293	-0.127022	-0.579415	-0.234945	-0.369057	-0.189801	-0.241016	-0.525923	-0.566463	-0.555131	0.048676
148577	hsa-miR-3943	-0.0359679	0.601709	0.565741	6.24938	0.187189	0.999293	0.54542	0.476485	0.645396	0.614709	0.546698	0.661441	0.510485	0.689716	0.611001	0.535902
11104	hsa-miR-422a	0.229622	0.605428	0.835049	9.25354	0.172045	0.999293	0.558228	0.648914	1.07074	1.02355	0.873816	0.422666	0.443255	1.23417	0.328993	0.598051
42730	hsa-miR-423-3p	-0.0393981	0.28254	0.243142	8.44378	0.571529	0.999293	0.335129	0.123008	0.210241	0.162133	0.385198	0.340722	0.388635	0.180402	0.232798	0.270142
27565	hsa-miR-423-5p	-0.105154	0.179092	0.0739379	9.21659	0.431826	0.999293	-0.119707	0.354007	-0.0440309	0.160203	0.0192169	0.151372	0.257096	0.456676	0.103067	-0.0727511
42965	hsa-miR-424	0.239755	-0.175332	0.0644222	8.66165	0.345545	0.999293	0.324211	-0.795438	0.208252	0.164151	0.420935	-0.192579	-0.483159	-0.754378	0.110325	0.44313
17608	hsa-miR-425	-0.258076	0.888767	0.630691	7.29215	0.0246269	0.999293	0.670081	0.534006	0.614481	0.673602	0.661285	0.827223	0.829519	0.657366	0.995963	1.13376
11108	hsa-miR-425*	-0.044435	0.177691	0.133256	5.97307	0.39858	0.999293	0.0495529	0.243223	0.144	0.135086	0.0944162	0.170101	0.204806	0.193838	0.305922	0.0137875
147631	hsa-miR-4258	-0.0481198	0.852902	0.804782	7.47197	0.458321	0.999293	0.631535	0.698788	0.832756	1.08618	0.774655	0.755113	0.664579	1.03033	0.953646	0.860839
147942	hsa-miR-4268	-0.126548	-1.77774	-1.90429	9.75194	0.766804	0.999293	-2.21964	-0.654237	-2.42986	-1.73815	-2.47955	-1.41547	-1.95538	-1.48443	-1.58095	-2.45246
147751	hsa-miR-4274	0.018992	1.57852	1.59752	6.90962	0.763634	0.999293	1.56051	1.51091	1.73009	1.50257	1.6835	1.59378	1.62728	1.76344	1.45585	1.45227
147743	hsa-miR-4275	0.142992	0.00712328	0.150115	7.90735	0.173788	0.999293	0.390793	-0.130393	0.192898	0.138216	0.159061	0.104495	0.0208991	0.0416571	-0.203356	0.0719214
147767	hsa-miR-4279	-0.0388986	-1.97261	-2.0115	10.8532	0.905722	0.999293	-2.16274	-0.9418	-2.48197	-1.95079	-2.52022	-1.68674	-2.05644	-1.83485	-1.8077	-2.47729
147636	hsa-miR-4284	0.222216	-0.657799	-0.435583	14.2147	0.669403	0.999293	0.314449	-1.87935	-0.559392	-0.0822148	0.02859	-0.129042	-0.367843	-1.96615	-0.747149	-0.0788097
147604	hsa-miR-4285	-0.190357	-0.590764	-0.781121	9.62955	0.536295	0.999293	-1.49139	0.40605	-1.27718	-0.613753	-0.92933	-0.757682	-0.311853	-0.434967	-0.590974	-0.858345
147744	hsa-miR-4286	0.095622	0.199898	0.29552	14.1047	0.0285237	0.999293	0.249093	0.260233	0.502408	0.203674	0.262191	0.243772	0.124437	0.351072	0.152019	0.12819
147588	hsa-miR-4288	-1.06347	0.89092	-0.172551	10.0776	0.056384	0.999293	0.157895	0.23063	-0.542578	0.515011	-1.22371	0.556823	1.55571	1.00543	0.431244	0.905389
147735	hsa-miR-4289	-0.0668513	-0.238396	-0.305247	7.77049	0.809232	0.999293	0.00460264	-1.02576	-0.183714	-0.413873	0.0925068	-0.0975313	-0.127073	-0.894446	-0.21077	0.137839
147920	hsa-miR-4290	-0.131101	-1.67249	-1.80359	9.34954	0.778441	0.999293	-2.2099	-0.491891	-2.49058	-1.72733	-2.09827	-1.347	-1.91292	-1.45565	-1.51531	-2.13158
147616	hsa-miR-4291	-0.225669	0.51292	0.287251	10.378	0.0112033	0.999293	0.291283	0.212592	0.31661	0.308763	0.307005	0.582048	0.583368	0.438381	0.412069	0.548734
147600	hsa-miR-4292	-0.067413	0.448234	0.380821	6.34356	0.379519	0.999293	0.179745	0.443488	0.396866	0.546886	0.337121	0.266217	0.369318	0.570306	0.797923	0.237406
147632	hsa-miR-4297	-0.0421497	-0.37344	-0.415589	6.15955	0.325755	0.999293	-0.474085	-0.409422	-0.437906	-0.355284	-0.401251	-0.316501	-0.44807	-0.347049	-0.391356	-0.364222
147614	hsa-miR-4299	0.28883	-0.253789	0.0350407	8.50257	0.158688	0.999293	-0.389542	0.341697	0.0226948	0.313071	-0.112718	-0.112734	-0.201649	-0.103754	-0.343461	-0.507348
147861	hsa-miR-4301	-0.0805007	0.573324	0.492823	12.817	0.445388	0.999293	0.283902	0.685515	0.543357	0.255636	0.695706	0.685424	0.740521	0.681408	0.236753	0.522513
147722	hsa-miR-4306	-0.257326	-0.139935	-0.39726	9.23643	0.170802	0.999293	-0.988778	0.178347	-0.711499	0.193114	-0.657485	-0.395753	-0.0832017	-0.16131	0.432636	-0.492045
147947	hsa-miR-4308	-0.0231926	-0.355333	-0.378526	6.17971	0.810283	0.999293	-0.349096	-0.26267	-0.478766	-0.387759	-0.414338	-0.263767	-0.498534	-0.323122	-0.52343	-0.167813
147907	hsa-miR-4312	0.0233003	0.633804	0.657105	6.5151	0.637623	0.999293	0.560194	0.578962	0.718883	0.703192	0.724292	0.620549	0.632512	0.748243	0.53128	0.636438
147776	hsa-miR-4317	0.0384683	-0.171983	-0.133515	8.84556	0.89903	0.999293	0.38161	-0.951559	-0.0826166	-0.124013	0.109006	0.0271367	-0.0655789	-0.925216	-0.050817	0.154561
147671	hsa-miR-4323	-0.0122001	0.38849	0.37629	6.09589	0.831675	0.999293	0.339425	0.311259	0.432586	0.297795	0.500384	0.413744	0.299142	0.533771	0.38344	0.312352
147847	hsa-miR-4324	0.0207988	-0.257914	-0.237115	8.75709	0.731614	0.999293	0.0370667	-0.295852	-0.464733	-0.238988	-0.223071	-0.10738	-0.161791	-0.380977	-0.375188	-0.264235
147771	hsa-miR-4328	-0.0201573	-0.0132543	-0.0334116	10.8427	0.902724	0.999293	0.0862212	-0.472811	0.0359814	0.0158664	0.167684	0.0594682	0.103435	-0.346997	-0.0242829	0.142105
147926	hsa-miR-4329	0.0584303	-0.229276	-0.170845	7.43629	0.0818906	0.999293	-0.0340499	-0.244378	-0.228569	-0.170076	-0.177154	-0.139529	-0.219284	-0.273849	-0.28637	-0.227347
18847	hsa-miR-450a	0.0948497	0.621956	0.716806	6.73899	0.30759	0.999293	0.921815	0.382184	0.867227	0.6241	0.788703	0.67107	0.519984	0.567384	0.553598	0.797744
42866	hsa-miR-451	-1.10548	-2.10458	-3.21007	10.7202	0.0734874	0.999293	-3.38746	-3.10016	-3.53739	-2.91647	-3.10886	-2.4218	-0.975117	-4.11276	-1.4162	-1.59704
29379	hsa-miR-452	0.0544255	0.167149	0.221575	7.34032	0.612168	0.999293	0.160408	0.436808	0.181567	0.238862	0.0902305	0.342272	0.531404	-0.143187	0.26619	-0.160932
28950	hsa-miR-455-3p	0.207959	-0.63569	-0.427732	5.99269	0.306886	0.999293	-0.0176679	-0.95094	-0.368549	-0.599997	-0.201503	-0.541063	-0.631198	-0.999661	-0.540688	-0.465842
13179	hsa-miR-455-5p	0.199708	0.20013	0.399837	6.57467	0.109291	0.999293	0.561185	0.172627	0.529701	0.273269	0.462406	0.30049	0.29625	0.097861	0.173799	0.132248
148682	hsa-miR-483-3p	-0.182007	-1.7183	-1.90031	10.5308	0.694548	0.999293	-2.15769	-0.712661	-2.33439	-1.78177	-2.51502	-1.35782	-2.00975	-1.09512	-1.62929	-2.49952
42654	hsa-miR-483-5p	-0.385163	-0.0196505	-0.404813	7.35943	0.169547	0.999293	-0.955823	0.0415125	-0.714668	0.0750271	-0.470115	-0.701217	-0.388825	0.0614376	0.550075	0.380277
145753	hsa-miR-484	-0.0196504	0.404637	0.384986	6.81038	0.546626	0.999293	0.416186	0.340493	0.388609	0.322699	0.456945	0.437995	0.469449	0.400383	0.27521	0.440147
42694	hsa-miR-485-3p	-0.148704	-0.522921	-0.671625	6.58571	0.350441	0.999293	-1.04536	-0.212069	-0.753968	-0.572381	-0.774352	-0.67461	-0.548432	-0.299751	-0.351096	-0.740717
42480	hsa-miR-485-5p	0.105169	1.08447	1.18964	6.03464	0.25964	0.999293	1.12331	1.16756	1.21717	1.1541	1.28606	1.04057	1.16539	1.23686	1.11145	0.86811
32946	hsa-miR-486-5p	0.0536258	0.268435	0.32206	8.59846	0.782061	0.999293	-0.0342842	0.185937	0.383078	0.954944	0.120627	0.0960318	0.239618	0.541928	0.180577	0.284019
14285	hsa-miR-487b	0.0809989	0.0690134	0.150012	8.99013	0.319838	0.999293	0.178807	-0.0507313	0.215128	0.0786852	0.328173	0.0988508	-0.0192054	0.315697	-0.0701734	0.0198984
42704	hsa-miR-488	0.000251041	0.0986551	0.0989061	6.14925	0.99556	0.999293	0.139241	0.134577	0.179867	0.123185	-0.0823404	0.0652909	0.0523302	0.253105	0.0773315	0.0452183
42703	hsa-miR-490-3p	0.175188	-0.1591	0.0160883	7.10421	0.147389	0.999293	-0.239391	0.313788	0.323937	-0.180757	-0.137137	-0.197147	-0.120794	0.350787	-0.542478	-0.285868
17822	hsa-miR-490-5p	0.141922	0.472684	0.614606	6.52791	0.0065015	0.999293	0.561367	0.58679	0.919169	0.413575	0.592129	0.485467	0.492142	0.777155	0.245691	0.362964
147701	hsa-miR-491-3p	-0.0563059	-1.33133	-1.38763	12.873	0.612871	0.999293	-1.3008	-1.27326	-1.39803	-1.4688	-1.49726	-0.850292	-1.39123	-1.38951	-1.43408	-1.59152
147953	hsa-miR-491-5p	0.0552828	0.0119567	0.0672395	6.27783	0.327157	0.999293	0.265851	-0.00641397	0.179506	0.0111441	-0.113889	0.141643	0.132573	0.094238	-0.0674187	-0.241252
42661	hsa-miR-492	-0.00271616	-0.418697	-0.421413	5.91313	0.988273	0.999293	-0.525952	-0.3686	-0.549418	-0.301955	-0.361141	-0.661948	-0.513019	-0.502302	0.336963	-0.75318
42847	hsa-miR-497	-0.00902801	0.0100608	0.00103277	8.07165	0.929513	0.999293	0.182679	-0.117923	-0.357843	-0.170525	0.468776	0.120603	0.247073	-0.320354	-0.284943	0.287925
42442	hsa-miR-498	-0.000671324	-0.12146	-0.122132	7.74413	0.997336	0.999293	-0.547188	0.566403	-0.275344	-0.0882023	-0.266327	-0.243271	-0.01441	0.231007	-0.162628	-0.418
145692	hsa-miR-499-3p	-0.269824	-0.175553	-0.445377	8.84829	0.429466	0.999293	0.723174	-0.125397	0.996738	-2.0494	-1.772	0.949399	0.955653	0.663874	-2.51457	-0.932126
14313	hsa-miR-499-5p	-0.0199517	0.25126	0.231308	12.2275	0.941783	0.999293	0.497532	-0.348273	0.525438	0.185402	0.29644	0.430637	0.429048	-0.220958	-0.0159912	0.633563
17875	hsa-miR-500a	0.0161901	0.473137	0.489328	6.14853	0.812143	0.999293	0.536106	0.491764	0.495549	0.417313	0.505904	0.455544	0.543209	0.502702	0.577229	0.287003
46406	hsa-miR-500a*	-0.00502436	0.34971	0.344686	6.21253	0.957283	0.999293	0.456256	0.199388	0.346965	0.309253	0.411568	0.347308	0.444238	0.242988	0.496771	0.217246
145675	hsa-miR-501-5p	-0.211434	0.779985	0.568551	6.47937	0.569866	0.999293	0.140223	1.55016	0.360456	0.460883	0.33103	0.673737	0.630421	1.54058	0.544467	0.510724
146178	hsa-miR-502-3p	0.0476073	0.027035	0.0746423	6.05842	0.642584	0.999293	0.249817	-0.040232	0.0667858	0.0481228	0.048718	0.0769229	0.143604	-0.0117254	0.194654	-0.268281
42490	hsa-miR-505*	-0.085895	0.660403	0.574508	6.88521	0.158287	0.999293	0.439349	0.630159	0.746901	0.505167	0.550964	0.684919	0.647329	0.836646	0.628673	0.504448
42812	hsa-miR-508-5p	0.0241912	0.102248	0.126439	6.1354	0.771837	0.999293	0.0730954	0.305886	0.129819	0.0217415	0.101654	0.0922311	0.0957808	0.356628	0.0334787	-0.066879
42581	hsa-miR-513a-5p	-0.0557296	0.459457	0.403727	9.05567	0.828044	0.999293	-0.197304	0.985655	0.468495	0.61316	0.148631	0.491607	0.501701	1.04377	0.309065	-0.0488596
46789	hsa-miR-513b	0.056708	1.02869	1.0854	6.57585	0.492979	0.999293	0.827869	1.33001	1.14984	1.06473	1.05454	0.983069	1.08641	1.22304	0.978092	0.872847
11151	hsa-miR-516b	-0.00328856	-0.169578	-0.172867	6.50897	0.967428	0.999293	-0.341355	0.0898379	-0.0509937	-0.201746	-0.360077	-0.224442	-0.187401	0.0941603	-0.150319	-0.37989
148641	hsa-miR-518b	-0.0763444	-0.47615	-0.552495	6.26512	0.202954	0.999293	-0.498434	-0.448596	-0.692596	-0.55852	-0.564326	-0.387137	-0.446981	-0.593454	-0.620199	-0.33298
13137	hsa-miR-518e*/hsa-miR-519a*/hsa-miR-519b-5p/hsa-miR-519c-5p/hsa-miR-522*/hsa-miR-523*	-0.131123	-0.454476	-0.585599	6.77615	0.447417	0.999293	-0.813905	-0.0338961	-0.878247	-0.559772	-0.642175	-0.571086	-0.481454	-0.422451	-0.251014	-0.546374
46221	hsa-miR-519d	-0.00819036	0.322459	0.314269	6.40683	0.869558	0.999293	0.32778	0.323002	0.399637	0.185094	0.33583	0.452575	0.294746	0.346531	0.295507	0.222937
11164	hsa-miR-519e	0.0691334	0.138968	0.208102	6.72671	0.363921	0.999293	0.417886	0.0995229	0.10612	0.161763	0.255216	0.213777	0.174136	0.213713	0.0441926	0.049022
13132	hsa-miR-519e*	-0.0262391	-0.188054	-0.214293	7.37366	0.845677	0.999293	-0.326395	0.144829	-0.3716	-0.258762	-0.259537	-0.373595	-0.155855	0.0422153	-0.0574432	-0.395592
11175	hsa-miR-525-5p	-0.0392998	-0.275719	-0.315019	7.34227	0.802204	0.999293	-0.318052	-0.0462688	-0.637675	-0.13577	-0.437329	-0.255937	-0.42333	-0.0975672	-0.169599	-0.432162
42732	hsa-miR-532-3p	0.00188151	0.185373	0.187255	5.91933	0.979449	0.999293	0.189453	0.139516	0.19983	0.153069	0.254405	0.357576	0.200445	-0.0210272	0.22604	0.163831
17624	hsa-miR-532-5p	0.00227177	-0.031821	-0.0295492	5.86884	0.977925	0.999293	0.101531	-0.166378	-0.0896027	0.0224568	-0.0157527	-0.058774	0.0564486	-0.116412	0.143751	-0.184118
14272	hsa-miR-542-3p	0.185584	0.161495	0.347079	6.82	0.116656	0.999293	0.499223	-0.000861133	0.472923	0.335171	0.42894	0.258617	0.159427	0.0698302	0.101645	0.217958
42811	hsa-miR-542-5p	0.12587	0.0617335	0.187604	6.12682	0.0914145	0.999293	0.19069	0.274308	0.22184	0.155819	0.0953611	0.0517464	0.00660783	0.282813	-0.053282	0.0207825
46705	hsa-miR-548k	0.0278461	-0.136682	-0.108836	5.8466	0.84057	0.999293	-0.2481	0.160084	-0.214124	0.0236083	-0.265647	-0.117011	-0.202787	0.101511	-0.271274	-0.193849
147584	hsa-miR-548t	-0.049295	-0.112565	-0.16186	5.70084	0.742667	0.999293	-0.288327	0.191465	-0.222146	-0.1244	-0.365894	-0.175839	-0.156434	0.296736	-0.120611	-0.406678
145789	hsa-miR-550a	0.0488048	0.268551	0.317356	6.52367	0.323101	0.999293	0.356847	0.274566	0.171078	0.53657	0.247717	0.287034	0.268307	0.231364	0.50871	0.047341
17272	hsa-miR-551a	-0.0162198	-0.0824241	-0.0986439	6.47096	0.901829	0.999293	-0.0998652	0.0795853	-0.160562	-0.0686441	-0.243733	0.0829235	-0.162565	0.218867	-0.332443	-0.218903
148644	hsa-miR-551b	0.259429	-0.172026	0.0874034	5.95425	0.102924	0.999293	0.262099	-0.406133	0.235029	0.279753	0.0662695	-0.141606	-0.191151	-0.252776	-0.0203811	-0.254213
42781	hsa-miR-551b*	-0.251106	-0.119174	-0.37028	6.28223	0.147147	0.999293	-0.715562	0.0386837	-0.14915	-0.461236	-0.564137	-0.254161	-0.262941	0.221815	-0.0623469	-0.238236
17668	hsa-miR-552	-0.0858148	0.255687	0.169873	5.79128	0.718279	0.999293	-0.0677849	0.871335	0.0956923	0.0677317	-0.117611	0.0747559	0.237634	0.844493	0.257271	-0.135717
28966	hsa-miR-574-3p	-0.0384234	-0.077092	-0.115515	7.6879	0.583061	0.999293	0.0338462	-0.364815	-0.350199	0.0681611	0.0354294	-0.056598	-0.137849	-0.204191	0.0745037	-0.0613254
27740	hsa-miR-574-5p	-0.162933	0.0260888	-0.136844	7.85776	0.379646	0.999293	-0.354226	0.180335	-0.1779	-0.0902348	-0.242193	0.0635855	-0.188999	0.405214	0.0731437	-0.222501
42446	hsa-miR-576-5p	0.0144435	0.468285	0.482728	6.36273	0.751339	0.999293	0.501004	0.425151	0.579629	0.307957	0.5999	0.537196	0.51289	0.532089	0.320083	0.439166
145647	hsa-miR-584	0.0466035	0.344007	0.39061	6.7886	0.431856	0.999293	0.261583	0.331273	0.291756	0.636875	0.431565	0.259109	0.265008	0.3944	0.596354	0.205163
17546	hsa-miR-585	-0.147862	0.00279292	-0.145069	6.81245	0.167176	0.999293	-0.466783	0.353505	-0.341519	-0.073802	-0.196746	-0.376194	0.32074	0.0314631	0.263825	-0.225869
42542	hsa-miR-589	0.0132897	0.0773178	0.0906075	6.84283	0.895707	0.999293	0.21323	-0.0805332	-0.217272	0.183791	0.353822	0.0641292	0.0365208	0.0667032	-0.0614978	0.280734
17503	hsa-miR-590-5p	0.0625516	-0.247517	-0.184965	6.46991	0.843177	0.999293	0.352185	-1.04426	-0.0503843	-0.298981	0.11661	-0.141411	-0.113437	-0.863108	-0.221961	0.102333
42504	hsa-miR-593	0.0145291	1.23235	1.24688	6.03371	0.807353	0.999293	1.27127	1.24212	1.21789	1.23283	1.2703	1.19984	1.31591	1.36177	1.05984	1.2244
42818	hsa-miR-597	0.0673395	0.00486215	0.0722016	6.54778	0.385358	0.999293	0.233303	-0.0156715	0.0539238	-0.0151855	0.104638	0.0252563	0.0234148	0.0343674	-0.265579	0.206851
17377	hsa-miR-600	0.209062	0.0524834	0.261545	9.20764	0.513416	0.999293	0.722848	-0.645499	0.353588	0.321941	0.554849	0.489098	0.215881	-0.329481	-0.463881	0.350801
17498	hsa-miR-601	0.0547465	0.452369	0.507116	6.13877	0.514334	0.999293	0.320538	0.4737	0.836659	0.307493	0.59719	0.474687	0.50487	0.673937	0.2958	0.312554
145736	hsa-miR-605	-0.175014	-0.00863218	-0.183646	6.15255	0.4861	0.999293	-0.450466	0.910281	-0.62373	-0.547825	-0.20649	-0.191555	0.229288	0.0299786	-0.102352	-0.00851962
27672	hsa-miR-615-3p	-0.0803183	-0.4538	-0.534118	5.99062	0.19038	0.999293	-0.54927	-0.372653	-0.639596	-0.508855	-0.600218	-0.419722	-0.476769	-0.470186	-0.462805	-0.439519
17336	hsa-miR-618	0.098291	1.10046	1.19875	6.24024	0.19591	0.999293	1.22633	1.18768	1.27578	1.07529	1.2287	1.20614	1.20282	1.21715	0.99002	0.886185
148652	hsa-miR-620	0.0502393	-0.504115	-0.453875	6.61411	0.230547	0.999293	-0.514413	-0.399081	-0.378072	-0.611054	-0.366757	-0.461173	-0.561796	-0.407268	-0.693883	-0.396453
145740	hsa-miR-625*	-0.127426	-0.590873	-0.718299	8.06242	0.36961	0.999293	-0.961758	-0.247446	-0.978227	-0.498858	-0.905207	-0.795137	-0.58041	-0.693567	-0.0890107	-0.796243
148684	hsa-miR-628-3p	0.00444518	-0.273566	-0.269121	5.89902	0.912198	0.999293	-0.180595	-0.215132	-0.330691	-0.303439	-0.315749	-0.0877886	-0.215773	-0.32834	-0.443467	-0.292462
17961	hsa-miR-629	-0.0288682	0.695257	0.666389	6.01756	0.730351	0.999293	0.578791	0.648678	0.718585	0.650942	0.734948	0.706991	0.733559	0.789851	0.79022	0.455664
17566	hsa-miR-629*	0.0816498	0.129545	0.211194	6.88825	0.222215	0.999293	0.438938	0.129568	0.120939	0.173207	0.193319	0.199131	0.166146	0.160059	-0.00842	0.130805
17327	hsa-miR-630	-0.0956503	-0.345525	-0.441176	6.23813	0.447954	0.999293	-0.636149	-0.130323	-0.512032	-0.34226	-0.585114	-0.446715	-0.441639	-0.280538	0.000876282	-0.559612
42591	hsa-miR-634	0.103937	-0.589422	-0.485486	9.05788	0.481786	0.999293	-0.479171	-0.41095	-0.580602	-0.469513	-0.487193	-0.304914	-0.664793	-0.330062	-0.909676	-0.737667
42750	hsa-miR-636	0.0795278	0.303864	0.383392	5.90264	0.138938	0.999293	0.346924	0.312831	0.477187	0.330891	0.449128	0.368197	0.271806	0.404735	0.264167	0.210416
42832	hsa-miR-638	-0.110135	0.113199	0.00306377	8.26745	0.590788	0.999293	-0.454065	0.655178	-0.246205	0.137336	-0.0769236	-0.06618	0.15885	0.359384	0.101423	0.0125158
148396	hsa-miR-642b	-0.443191	-0.602255	-1.04545	8.10963	0.287062	0.999293	-1.43697	-0.243596	-1.62673	-0.474491	-1.44544	-1.09582	-0.904012	-0.468496	0.825889	-1.36883
42746	hsa-miR-647	0.0712488	0.0185777	0.0898265	6.5063	0.118277	0.999293	0.0282653	0.0927229	0.161232	0.0628176	0.104095	0.0680293	0.0495768	0.092946	-0.115393	-0.00227034
17394	hsa-miR-651	0.0725908	1.12074	1.19333	6.262	0.311271	0.999293	1.43408	1.06545	1.28573	1.02138	1.16001	1.32409	1.18	1.17536	1.02408	0.90016
42827	hsa-miR-652	-0.287871	0.493787	0.205916	7.87048	0.192596	0.999293	0.475571	-0.0253592	0.112003	0.437224	0.0301422	0.666134	0.81375	0.154213	0.246005	0.588834
21498	hsa-miR-654-3p	0.0315293	0.0983713	0.129901	5.86921	0.751341	0.999293	0.207978	-0.0556035	0.0893647	0.201965	0.205799	-0.0263238	0.0105952	0.070082	0.459134	-0.0216306
17460	hsa-miR-657	0.0853777	-0.356205	-0.270827	5.88543	0.196841	0.999293	-0.045352	-0.437705	-0.348978	-0.312319	-0.209781	-0.0909096	-0.360909	-0.422317	-0.575442	-0.331446
42749	hsa-miR-659	-0.112085	-0.0138938	-0.125979	7.58942	0.411985	0.999293	-0.566473	-0.00690061	-0.0106629	0.318654	-0.364514	-0.361878	-0.325342	0.41755	0.496735	-0.296533
17338	hsa-miR-660	0.00602309	-0.0399922	-0.0339692	6.24008	0.976645	0.999293	0.355676	-0.546136	-0.0762404	-0.0448202	0.141675	-0.0676832	0.0355002	-0.520602	0.0961341	0.25669
42807	hsa-miR-663	-0.0555508	0.296217	0.240667	5.97596	0.634988	0.999293	0.23381	0.320598	0.321644	0.244591	0.0826895	0.0839366	0.296651	0.196244	0.68265	0.221605
145973	hsa-miR-664	-0.0407398	0.114234	0.0734943	8.13144	0.67833	0.999293	-0.0944269	0.190772	0.0209592	0.152541	0.0976257	0.12057	-0.0372282	0.294631	0.118545	0.0746527
46829	hsa-miR-664*	0.000399614	0.195265	0.195664	5.91238	0.993019	0.999293	0.282223	0.0959327	0.212765	0.120315	0.267087	0.269567	0.249969	0.198404	0.102985	0.155399
145768	hsa-miR-665	-0.254057	-0.821062	-1.07512	7.62714	0.455116	0.999293	-1.91845	0.00586673	-1.4508	-0.573747	-1.43846	-1.3321	-0.898332	-0.547058	-0.204386	-1.12343
145701	hsa-miR-668	0.0226685	-0.226926	-0.204257	6.80406	0.881426	0.999293	-0.0571671	-0.653404	-0.0849303	-0.268711	0.0429247	-0.0541968	-0.273431	-0.573204	-0.388087	0.154289
42761	hsa-miR-675	-0.292791	-0.437891	-0.730681	7.33964	0.0948136	0.999293	-1.29514	-0.00690499	-1.19461	-0.062135	-1.09461	-0.962451	-0.203976	-0.588178	0.375521	-0.810369
42859	hsa-miR-675*	-0.129532	0.564053	0.434521	5.92434	0.380022	0.999293	0.547189	0.28891	0.165176	0.551772	0.61956	0.721537	0.634339	0.58618	0.577322	0.300887
148118	hsa-miR-676*	0.163086	-0.164571	-0.00148532	6.91483	0.418243	0.999293	0.604568	-0.0357286	-0.792316	0.133497	0.0825525	0.638629	0.0943101	-0.915931	-0.73475	0.0948844
29490	hsa-miR-7	-0.100645	0.240559	0.139914	6.61247	0.187912	0.999293	0.0967211	0.0769461	0.301126	0.129911	0.0948669	0.160043	0.185279	0.209617	0.435161	0.212697
42964	hsa-miR-7-2*	-0.095076	-0.0883707	-0.183447	5.70407	0.629183	0.999293	-0.506093	0.344172	-0.288585	-0.148602	-0.318126	-0.254698	-0.190141	0.279709	-0.150408	-0.126315
29190	hsa-miR-708	0.0785406	-0.239963	-0.161422	6.01157	0.607884	0.999293	0.0350714	-0.593045	-0.0860747	-0.247436	0.084372	-0.220307	-0.27468	-0.513613	-0.0611817	-0.130033
146196	hsa-miR-711	-0.0287682	-0.358482	-0.38725	6.23289	0.86545	0.999293	-0.708899	0.00513498	-0.386894	-0.363034	-0.48256	-0.404422	-0.437427	-0.0798748	-0.122225	-0.748461
146064	hsa-miR-718	-0.00749403	1.72262	1.71513	6.90351	0.842121	0.999293	1.63948	1.65341	1.73361	1.71419	1.83496	1.68647	1.74753	1.73188	1.59654	1.85071
148679	hsa-miR-720	-0.00857292	-0.0230943	-0.0316672	15.0084	0.927245	0.999293	-0.221562	0.10778	-0.00859404	-0.0552348	0.0192747	-0.0762551	-0.179872	0.125274	0.0986178	-0.0832362
27568	hsa-miR-744	0.168671	-0.576479	-0.407808	8.518	0.304985	0.999293	-0.624998	0.258137	-0.669881	-0.391538	-0.610763	-0.581524	-0.347813	-0.43961	-0.67261	-0.84084
146111	hsa-miR-767-5p	-0.0123595	0.56838	0.556021	8.07773	0.925485	0.999293	0.574204	0.733041	0.412619	0.436916	0.623323	0.58629	0.508242	0.890362	0.403953	0.453054
32891	hsa-miR-769-5p	-0.0233481	0.307632	0.284284	5.82382	0.801947	0.999293	0.213556	0.25499	0.436715	0.172446	0.343715	0.353374	0.444702	0.54878	0.139731	0.0515738
42808	hsa-miR-874	-0.0491431	0.20817	0.159027	6.72653	0.710863	0.999293	0.0572905	0.275289	0.122431	0.0496431	0.290481	0.115266	0.213144	0.239154	0.495084	-0.021798
28884	hsa-miR-876-3p	-0.0802198	-0.0356998	-0.11592	5.70968	0.473231	0.999293	-0.132052	-0.62066	0.209301	0.363045	-0.399232	0.139714	-0.512676	0.106518	0.166151	-0.0782054
30033	hsa-miR-877	-0.0471093	-0.0487909	-0.0959002	6.84915	0.701747	0.999293	-0.378285	0.184116	-0.120029	-0.084862	-0.0804416	-0.0722755	-0.129646	0.161029	-0.129483	-0.0735782
148622	hsa-miR-877*	-0.0374619	-0.913851	-0.951313	7.99491	0.840034	0.999293	-1.20288	-0.411329	-1.03001	-0.955985	-1.15636	-0.723631	-0.877006	-0.66311	-0.97357	-1.33194
46259	hsa-miR-885-5p	-0.0966884	1.24217	1.14549	6.43795	0.246769	0.999293	0.972562	1.17242	1.24037	1.12842	1.21365	1.33524	1.26251	1.23555	1.21027	1.16731
27961	hsa-miR-891a	-0.0163473	-0.296818	-0.313166	6.36971	0.916576	0.999293	-0.301362	-0.117804	-0.497065	-0.152449	-0.497148	-0.333073	-0.377618	-0.0894592	-0.482546	-0.201396
148621	hsa-miR-892a	-0.0591531	0.34414	0.284987	5.99196	0.118917	0.999293	0.222405	0.297735	0.338066	0.224312	0.342419	0.376764	0.344099	0.322667	0.240485	0.436687
42932	hsa-miR-920	-0.0308127	-0.139545	-0.170358	6.54974	0.836778	0.999293	-0.417139	0.192204	-0.144625	-0.215048	-0.267179	-0.20066	-0.298753	0.113145	-0.249672	-0.0617848
46507	hsa-miR-921	-0.0457339	0.39027	0.344536	6.13592	0.642606	0.999293	0.196345	0.683719	0.399945	0.212012	0.230659	0.3219	0.390322	0.640468	0.239153	0.359506
145693	hsa-miR-92a	-0.011945	0.0811962	0.0692512	8.75289	0.933929	0.999293	0.0808663	-0.281807	0.108058	0.288026	0.151114	0.0497233	0.201419	-0.25128	0.310837	0.0952825
145897	hsa-miR-92b	-0.037344	-0.234209	-0.271553	6.58155	0.669881	0.999293	-0.131539	-0.479328	-0.413	-0.136583	-0.197316	-0.263806	-0.186861	-0.530631	0.0127506	-0.202497
30687	hsa-miR-93	-0.181385	0.161806	-0.0195783	8.22343	0.12719	0.999293	-0.00381984	-0.074059	-0.0355989	-0.107081	0.122668	0.0489563	0.31567	-0.0591235	0.322123	0.181406
17863	hsa-miR-934	0.0225268	-0.221917	-0.199391	6.27538	0.781475	0.999293	-0.317495	-0.0221707	-0.147078	-0.311321	-0.198888	-0.14522	-0.256799	-0.0513776	-0.302773	-0.353417
42514	hsa-miR-937	0.0401582	0.321503	0.361661	7.67074	0.866571	0.999293	0.593144	0.34658	-0.0322047	0.464348	0.436439	0.610795	0.314189	0.539403	-0.360879	0.504006
146115	hsa-miR-940	-0.00323078	0.393213	0.389982	6.0267	0.96087	0.999293	0.354398	0.218462	0.394501	0.443678	0.538869	0.331419	0.378076	0.505456	0.403992	0.347119
42696	hsa-miR-943	-0.0554222	-0.124478	-0.1799	7.79378	0.771663	0.999293	-0.700705	0.533037	-0.374904	-0.0119876	-0.344939	-0.422703	0.0835192	-0.160955	-0.281789	0.15954
13147	hsa-miR-96	-0.0681482	0.355601	0.287453	6.02231	0.349499	0.999293	0.277145	0.194227	0.361755	0.178182	0.425957	0.346379	0.508858	0.356492	0.131103	0.435175
11182	hsa-miR-98	0.182451	-0.444846	-0.262395	9.59404	0.550231	0.999293	0.110252	-0.994782	-0.107105	-0.316513	-0.00382668	-0.193598	-0.224116	-1.0903	-0.555935	-0.16028
42708	hsa-miR-99a	0.146736	-0.313828	-0.167092	9.83716	0.568625	0.999293	0.177223	-0.861864	-0.0733074	-0.0931059	0.0155927	-0.200193	-0.140808	-0.776167	-0.289788	-0.162184
145651	hsa-miR-99a*	0.17849	-0.233216	-0.0547256	6.08856	0.26012	0.999293	0.317907	-0.524258	-0.0866309	0.00989324	0.00946004	-0.0530852	-0.205464	-0.545207	-0.243168	-0.119154
11184	hsa-miR-99b	0.0210854	0.131051	0.152136	8.78509	0.867174	0.999293	0.427564	-0.0890337	0.216476	-0.0612182	0.266893	0.313581	0.294965	-0.0130107	0.0364598	0.0232582
17898	hsa-miR-99b*	-0.170326	0.608262	0.437936	7.41152	0.48013	0.999293	0.22579	0.969367	0.298574	0.386628	0.309321	0.508785	0.519891	1.20121	0.461973	0.349448
28302	hsa-miRPlus-A1015	0.190577	0.593926	0.784503	9.95528	0.188101	0.999293	0.661434	0.997117	0.62551	1.16635	0.472106	0.563237	0.569314	0.858771	0.889675	0.088634
42780	hsa-miRPlus-A1065	-0.0495026	-0.114386	-0.163889	6.78166	0.743113	0.999293	-0.147094	-0.555029	-0.0109044	0.00387663	-0.110294	0.104612	-0.0857873	-0.0918483	-0.0468608	-0.452047
42793	hsa-miRPlus-A1072	-0.197702	-0.153726	-0.351428	7.68387	0.490772	0.999293	-0.69088	0.365283	-0.529501	-0.435343	-0.466698	-0.257221	-0.363493	0.260217	0.0260398	-0.434171
17858	hsa-miRPlus-A1073	0.021336	1.52964	1.55098	6.94957	0.771396	0.999293	1.4437	1.47987	1.63159	1.52954	1.67019	1.56907	1.60585	1.57395	1.46998	1.42936
145956	hsa-miRPlus-A1083	-0.0282903	0.924675	0.896385	6.92794	0.604918	0.999293	0.753744	0.880867	0.921856	0.962112	0.963346	0.872911	0.954936	0.922179	1.06619	0.807156
17885	hsa-miRPlus-A1086	-0.508359	-1.38689	-1.89525	7.06908	0.00998264	0.999293	-1.29196	-2.11347	-2.0385	-2.18193	-1.85039	-0.517011	-1.83988	-1.62098	-1.87581	-1.08078
17848	hsa-miRPlus-A1087	-0.618961	-0.318227	-0.937188	7.89226	0.0457039	0.999293	-0.467833	-1.66114	-0.74973	-1.21077	-0.596468	0.203577	-0.475047	-0.899568	-0.576319	0.156222
17653	hsa-miRPlus-C1049	0.128934	0.975399	1.10433	9.68257	0.447261	0.999293	1.0425	0.677505	1.3637	1.34447	1.09349	1.03497	0.954671	1.04347	0.734089	1.1098
42838	hsa-miRPlus-C1076	-0.0814091	0.144258	0.0628491	6.10862	0.334977	0.999293	-0.0504436	0.247404	-0.0360793	0.198385	-0.0450209	0.0517671	0.0989937	0.0330253	0.262728	0.274777
17841	hsa-miRPlus-C1100	-0.0751924	0.462585	0.387393	5.92665	0.410131	0.999293	0.407697	0.155159	0.33329	0.483204	0.557615	0.49269	0.451326	0.299336	0.678792	0.390783
17955	hsa-miRPlus-C1110	0.0743766	-0.150727	-0.0763503	7.17914	0.724505	0.999293	-0.35392	0.898727	-0.345163	-0.333313	-0.248082	-0.322485	0.053914	-0.10054	-0.174493	-0.21003
145933	hsa-miRPlus-C1115	-0.205824	0.581683	0.375859	6.52767	0.635901	0.999293	-0.0942736	1.49033	0.110833	0.38684	-0.014439	0.410564	0.480159	1.58367	0.456099	-0.0220742
146166	hsa-miRPlus-G1065-5p	0.342057	-0.28755	0.00702659	5.81684	0.128232	0.999293	-0.123168	0.386688	-0.080392	0.0349008	-0.182896	-0.164325	-0.210102	-0.157363	-0.61841
146113	hsa-miRPlus-G1246-3p	0.114251	-0.0594479	0.0548027	6.58581	0.288177	0.999293	0.106174	-0.130206	0.0693364	0.14784	0.0808703	-0.11956	-0.107294	-0.0616831	0.296288	-0.30499
147536	hsa-miRPlus-I107*	0.0265448	-0.0161783	0.0103664	5.94156	0.777254	0.999293	0.24299	-0.24881	0.0187285	-0.0441163	0.08304	0.135648	0.0598994	-0.181619	-0.138246	0.0434257
148504	hsa-miRPlus-I874*	-0.0521204	0.259857	0.207736	6.55124	0.394286	0.999293	0.175781	0.0817028	0.224231	0.307624	0.249343	0.265425	0.327959	0.196634	0.24668	0.262587
147975	hsa-miRPlus-J1003	-0.0316768	0.127371	0.0956946	6.1085	0.591966	0.999293	0.0413719	0.181218	0.109431	0.0861112	0.060341	0.244245	0.135157	0.206432	-0.0211027	0.0721248
147415	hsa-miRPlus-J1011	-0.0543107	-0.536173	-0.590483	6.32368	0.585977	0.999293	-0.651367	-0.388601	-0.566008	-0.594308	-0.752132	-0.355181	-0.602964	-0.37884	-0.678556	-0.665323
147280	hsa-miRPlus-J1185-1*	0.0333343	1.32067	1.35401	6.59669	0.524838	0.999293	1.22922	1.39534	1.41167	1.30548	1.42831	1.28433	1.4162	1.3632	1.32412	1.21551
42502	hsa-miRPlus-J204*	0.0408933	-0.0999136	-0.0590203	8.25473	0.825414	0.999293	-0.630985	0.513043	-0.045671	0.221832	-0.35332	-0.216458	-0.0918222	0.171335	0.0988532	-0.461475
147576	hsv1-miR-H1*	0.0221236	0.708514	0.730637	6.00335	0.754756	0.999293	0.664596	0.667686	0.777973	0.727425	0.815507	0.78231	0.742058	0.773277	0.692622	0.552301
147889	hsv1-miR-H14-3p	0.0308592	0.0521866	0.0830458	5.93023	0.776817	0.999293	-0.0391197	0.176325	-0.0115602	0.149289	0.140295	-0.0945135	-0.0531115	0.148117	0.389902	-0.129461
147804	hsv1-miR-H17	0.12788	-0.320042	-0.192163	6.43374	0.209458	0.999293	-0.419734	0.290736	-0.466884	0.0138367	-0.378768	-0.476007	-0.0353287	-0.317214	-0.27223	-0.49943
146058	hsv1-miR-H3	0.0210388	1.33083	1.35187	6.1349	0.772682	0.999293	1.2652	1.33069	1.31815	1.3307	1.51463	1.3386	1.38264	1.44533	1.2094	1.27819
146159	hsv1-miR-H4*	0.0185247	-0.411851	-0.393327	8.38939	0.763014	0.999293	-0.29165	-0.635082	-0.400158	-0.475937	-0.163808	-0.236948	-0.493067	-0.414032	-0.557601	-0.357609
146098	hsv1-miR-H5-3p	0.249245	-0.515611	-0.266366	6.98383	0.196486	0.999293	0.336589	-0.699112	-0.278339	-0.411933	-0.279034	0.000542961	-0.38157	-0.813096	-0.969522	-0.414409
146117	hsv1-miR-H6-3p	0.0545086	-0.828926	-0.774417	10.1508	0.777051	0.999293	-1.37857	0.146708	-1.06337	-0.575438	-1.00141	-1.03147	-0.453058	-0.764775	-0.880239	-1.01509
146090	hsv1-miR-H7*	-0.613701	-1.06128	-1.67498	8.75831	0.156096	0.999293	-2.85146	-0.131445	-2.49383	-0.976941	-1.92121	-1.57513	-0.528287	-0.961222	-0.714781	-1.52696
146042	hsv1-miR-H8*	-0.00299453	0.78977	0.786775	7.49937	0.962089	0.999293	0.575146	0.64276	0.775877	1.03678	0.903315	0.694047	0.631453	0.929955	0.942794	0.750599
147803	hsv2-miR-H10	-0.252573	-0.189951	-0.442525	8.47387	0.410105	0.999293	-1.22423	0.647903	-0.764134	0.0075572	-0.879721	-0.543226	0.0807237	0.215539	-0.0950258	-0.607767
147738	hsv2-miR-H20	0.0838359	-0.0126979	0.071138	7.12863	0.577271	0.999293	0.306409	-0.291655	-0.0467857	0.169835	0.217887	0.166053	0.0579821	-0.192223	-0.334613	0.239311
147864	hsv2-miR-H24	-0.0125505	0.584501	0.57195	6.71752	0.686516	0.999293	0.495321	0.438396	0.658561	0.674209	0.593264	0.58007	0.485583	0.701037	0.623253	0.53256
147884	hsv2-miR-H25	-0.16848	-0.636567	-0.805048	8.21078	0.558998	0.999293	-1.44883	0.310295	-1.36539	-0.614026	-0.907287	-0.863983	-0.310079	-0.477018	-0.734709	-0.797046
147900	hsv2-miR-H6*	0.0510191	-0.82143	-0.770411	7.88802	0.77852	0.999293	-1.08803	-0.408045	-0.759166	-0.815243	-0.781573	-0.655731	-0.895361	-0.509251	-1.04837	-0.998437
147790	hsv2-miR-H7-3p	-0.547484	-0.988101	-1.53559	8.2852	0.182873	0.999293	-2.41003	-0.0570823	-2.23956	-1.0593	-1.91195	-1.3865	-0.570349	-0.754768	-0.794664	-1.43422
147836	hsv2-miR-H7-5p	-0.110778	0.226479	0.115701	5.88204	0.340648	0.999293	-0.0604127	0.393188	-0.06864	0.23193	0.0824397	0.0587206	0.25085	0.361717	0.161958	0.299151
147840	hsv2-miR-H9-3p	-0.0282409	-0.48388	-0.512121	6.22216	0.377058	0.999293	-0.539445	-0.62361	-0.497489	-0.430104	-0.469957	-0.471443	-0.639447	-0.424681	-0.492228	-0.391601
42656	kshv-miR-K12-10a	0.00315353	1.62595	1.62911	7.04538	0.954541	0.999293	1.55851	1.54913	1.66843	1.63172	1.73774	1.70749	1.56971	1.7162	1.48324	1.65314
42624	kshv-miR-K12-10b	-0.0372949	1.56577	1.52847	6.75926	0.63816	0.999293	1.49246	1.46689	1.39993	1.59918	1.68389	1.52796	1.52162	1.69845	1.47674	1.60406
147919	kshv-miR-K12-12	-0.0193878	-0.00528924	-0.0246771	6.18853	0.889178	0.999293	-0.409564	0.479497	-0.15466	0.0765151	-0.115173	-0.153142	0.00833491	0.0728794	0.118008	-0.0725261
42795	kshv-miR-K12-3	-0.132429	-0.196367	-0.328796	7.24696	0.338344	0.999293	-0.559141	0.258061	-0.564258	-0.300685	-0.477958	-0.31556	-0.0134594	-0.117765	-0.285477	-0.249574
147885	kshv-miR-K12-5*	-0.145766	-0.185941	-0.331707	8.15693	0.351547	0.999293	-0.386536	-0.00301621	-0.338109	-0.537077	-0.393796	-0.0168221	-0.333388	0.0564786	-0.241098	-0.394875
17488	kshv-miR-K12-6-3p	0.0395066	-0.872614	-0.833107	8.58511	0.904554	0.999293	-1.35582	0.322202	-1.13727	-0.670706	-1.32394	-1.02957	-0.826841	-0.565175	-0.932883	-1.0086
19011	SNORD10	0.0694109	-0.0964674	-0.0270565	8.77712	0.801857	0.999293	0.344572	-0.756392	-0.110647	0.230726	0.15646	0.0600864	-0.135502	-0.881743	0.661499	-0.186677
19005	SNORD118	0.104056	-0.0817683	0.022288	8.09477	0.190061	0.999293	0.122243	-0.446168	0.0445108	0.603796	-0.212942	0.0141247	-0.549117	0.165408	0.46581	-0.505067
19606	SNORD12	0.0218799	0.00699816	0.0288781	6.40171	0.768938	0.999293	0.225858	-0.223808	0.0327032	-0.00676357	0.116401	0.114224	-0.00622153	-0.154433	0.024056	0.0573655
19603	SNORD13	0.148565	-0.208284	-0.0597192	8.35289	0.622567	0.999293	0.383911	-0.612856	0.0257296	0.274168	-0.369548	-0.0239562	0.00505025	-1.0246	0.24927	-0.247183
19013	SNORD14B	0.0399354	-0.140346	-0.10041	6.30431	0.743746	0.999293	0.0966779	-0.387333	-0.0275327	-0.149833	-0.0340314	-0.107295	-0.106987	-0.40479	-0.0894874	0.00683023
19008	SNORD2	0.0827775	0.0392911	0.122069	9.55566	0.658134	0.999293	0.338642	-0.279337	0.134081	0.274205	0.142753	0.0869825	-0.00525875	-0.368781	0.655742	-0.17223
19007	SNORD3@	-0.0565778	-0.228109	-0.284687	10.0604	0.764977	0.999293	-0.627471	-0.251772	-0.507466	0.224231	-0.260956	-0.514177	-0.638449	-0.211287	0.776923	-0.553555
46204	SNORD38B	0.0787937	-0.291933	-0.21314	8.52455	0.814492	0.999293	0.298307	-1.19618	-0.160029	-0.017087	0.00929105	-0.0774102	-0.241646	-1.0765	0.194499	-0.258613
46206	SNORD44	0.146461	-0.762387	-0.615926	7.71197	0.57533	0.999293	-0.117655	-1.43888	-0.721334	-0.325625	-0.476138	-0.712161	-0.920332	-1.4842	-0.108814	-0.586431
46205	SNORD48	0.091471	-0.0329205	0.0585505	8.73281	0.393495	0.999293	0.29772	-0.289906	-0.0896846	0.278327	0.0962956	0.0855725	-0.172462	-0.412735	0.4335	-0.0984774
46203	SNORD49A	0.154811	-0.646898	-0.492088	7.20852	0.632362	0.999293	0.0183884	-1.51096	-0.521322	-0.159581	-0.286965	-0.496777	-0.676256	-1.47101	-0.0936529	-0.496798
19604	SNORD4A	0.0642385	0.30019	0.364429	8.79881	0.401856	0.999293	0.458342	0.160783	0.254651	0.555934	0.392434	0.382606	0.28562	0.236105	0.50482	0.0917999
19605	SNORD6	0.00806071	0.525866	0.533926	9.24935	0.889125	0.999293	0.486486	0.549317	0.409583	0.937995	0.286251	0.508908	0.412594	0.581718	0.941847	0.18426
145663	SNORD65	0.00465523	0.138917	0.143573	10.7712	0.959943	0.999293	0.217263	-0.0622775	0.0240652	0.397442	0.14137	0.24993	0.114848	-0.122799	0.571302	-0.118694
145666	SNORD68	0.0187863	0.0755048	0.0942912	7.3559	0.839102	0.999293	0.318047	-0.294069	0.0715025	0.209693	0.166282	0.160772	-0.0180008	-0.143613	0.260677	0.11769
17492	sv40-miR-S1-5p	-0.282622	-0.757215	-1.03984	8.95466	0.514555	0.999293	-2.22098	0.292658	-1.90143	0.438917	-1.80835	-1.54539	-0.828904	-1.06932	0.406061	-0.748515

## Sheet: Table B
Supplemental file 4. Table B. Q-PCR array analysis of miR expression in tissue in pf-LVAD supported patients (pre vs control)
			Avg	Avg
ProbeID	Annotation	AvgHy3	Control	pre-LVAD	logFC	control 2	control 3	patient 1 pre	patient 2 pre	patient 3 pre	patient 5 pre	patient 6 pre
17415	ebv-miR-BART10	7.0172	0.458898	0.250066	-0.208832	0.482203	0.435593	0.34327	0.356192	0.211299	-0.198266	0.537837
27537	ebv-miR-BART13	7.36005	-0.136433	0.225613	0.362045	-0.152244	-0.120621	0.14063	0.249812	0.442456	0.239527	0.055638
17358	ebv-miR-BART16	6.88621	0.279416	0.25153	-0.0278858	0.257791	0.30104	0.332492	0.0132351	0.46118	0.102372	0.34837
42522	ebv-miR-BART19-3p	9.64575	-0.32877	2.09401	2.42278	-0.481559	-0.175982	1.86343	1.93821	3.7553	1.6894	1.22372
17532	ebv-miR-BART5	6.33697	-0.619391	-0.345228	0.274163	-0.56765	-0.671132	-0.495443	-0.195716	-0.303372	-0.562066	-0.169545
17561	ebv-miR-BART6-3p	7.8461	-1.11956	0.718327	1.83789	-1.34356	-0.895563	0.494517	0.446787	2.277	0.602848	-0.229511
17328	ebv-miR-BART8*	7.843	-1.86934	-0.643452	1.22589	-1.95291	-1.78577	-1.10708	-0.154332	-0.629038	-0.328899	-0.99791
42906	ebv-miR-BHRF1-1	6.38395	-0.5873	-0.416603	0.170698	-0.649552	-0.525049	-0.49071	-0.337094	-0.274361	-0.359611	-0.621237
42951	ebv-miR-BHRF1-2	8.17792	-0.613269	-0.215504	0.397765	-0.656639	-0.569898	-0.140334	-0.104518	-0.0917864	-0.585595	-0.155288
42782	hcmv-miR-UL148D	7.72427	0.131088	-0.70367	-0.834758	-0.413293	0.675469	-0.569452	-0.488651	-0.841521	-0.98002	-0.638708
147162	hsa-let-7a	10.7878	-0.0325839	-0.845277	-0.812693	0.0424017	-0.107569	-0.528612	-0.624986	-2.10188	-0.741137	-0.229765
42530	hsa-let-7a-2*	6.33854	-0.331348	-0.276437	0.054911	-0.339845	-0.322852	-0.195885	-0.278071	-0.163614	-0.38585	-0.358768
17888	hsa-let-7a*	6.19386	0.226072	-0.0201096	-0.246182	0.301177	0.150967	0.0205847	0.0369106	-0.111392	-0.0707797	0.0241282
147165	hsa-let-7b	11.8964	-0.300537	0.318315	0.618852	-0.292417	-0.308657	0.350025	0.428798	0.202053	0.315364	0.295335
42769	hsa-let-7b*	6.64946	-0.301862	-0.120924	0.180938	-0.289924	-0.313799	-0.133003	-0.122369	-0.167448	-0.196346	0.0145464
145820	hsa-let-7c	11.2369	-0.375254	0.0989179	0.474172	-0.337603	-0.412906	0.219723	0.229533	-0.0986696	0.030269	0.113735
145968	hsa-let-7d	10.0387	-0.0629219	-0.379528	-0.316606	-0.00373901	-0.122105	-0.138085	-0.2085	-0.869635	-0.531675	-0.149744
145633	hsa-let-7d*	7.39909	-0.473066	0.0479396	0.521006	-0.53741	-0.408722	0.0248786	0.178633	0.378401	-0.103579	-0.238635
145846	hsa-let-7e	9.60955	-0.0649795	-0.596529	-0.53155	-0.0818611	-0.0480979	-0.423206	-0.580863	-0.830045	-0.657134	-0.491398
145840	hsa-let-7f-1*	6.82404	-0.220015	-0.0846699	0.135345	-0.272976	-0.167054	-0.0768005	0.0208712	0.00139317	-0.110337	-0.258476
46438	hsa-let-7g	10.7986	0.0273607	-0.457019	-0.48438	0.119478	-0.064757	-0.219408	-0.340573	-1.41948	-0.314625	0.00899514
9938	hsa-let-7i	10.541	-0.302277	0.0936928	0.395969	-0.301632	-0.302921	0.17266	0.189175	-0.338243	0.386496	0.0583762
145746	hsa-let-7i*	6.16896	-0.130732	-0.287185	-0.156454	-0.131137	-0.130326	-0.187961	-0.252182	-0.655207	-0.129582	-0.210994
10916	hsa-miR-1	12.3851	1.08546	-1.09967	-2.18512	1.03128	1.13963	-0.969509	-1.22305	-3.05611	-0.406586	0.15692
145943	hsa-miR-100	8.85364	-0.495053	-0.406802	0.0882517	-0.456255	-0.533852	-0.308474	-0.239558	-0.999599	-0.276204	-0.210173
31026	hsa-miR-101	11.3279	0.00703428	0.0495993	0.0425651	0.0527237	-0.0386552	0.209843	0.337922	-0.574989	-0.0742973	0.349517
17935	hsa-miR-101*	6.14763	0.1484	0.122967	-0.0254325	0.18036	0.116439	0.194955	0.352935	0.0384637	-0.0369647	0.0654473
10919	hsa-miR-103a	9.57317	0.0373007	0.109583	0.0722819	0.018752	0.0558493	0.205105	0.16125	-0.392103	0.220863	0.352798
146223	hsa-miR-103a-2*	6.01227	-0.124213	-0.0777849	0.046428	-0.161304	-0.0871215	-0.0416431	-0.0181566	-0.0382715	-0.153405	-0.137448
46801	hsa-miR-106a	7.45025	-0.535546	-0.485074	0.0504727	-0.409874	-0.661219	-0.651436	-0.192344	-1.23808	0.00605726	-0.349566
19582	hsa-miR-106b	8.88095	-0.296789	0.152915	0.449704	-0.232246	-0.361333	0.0857321	0.358135	-0.0452186	0.233238	0.13269
17854	hsa-miR-106b*	6.73063	-0.519037	0.151533	0.67057	-0.613789	-0.424284	0.091416	0.22534	0.633917	-0.0409859	-0.152023
10923	hsa-miR-107	8.7154	0.00477461	-0.03513	-0.0399046	-0.053386	0.0629352	0.0861547	0.0814607	-0.525738	-0.0308919	0.213364
13485	hsa-miR-10a	6.91725	0.191414	-0.581458	-0.772872	-0.225515	0.608344	-0.703611	-0.539813	-1.09574	-0.474925	-0.093196
10925	hsa-miR-10b	6.59585	0.19361	-0.802773	-0.996383	-0.238659	0.625879	-0.983272	-0.66958	-1.2833	-0.628737	-0.448979
46258	hsa-miR-1184	7.19243	-0.56258	-0.163013	0.399568	-0.693676	-0.431485	-0.224134	-0.000643174	-0.194387	-0.196547	-0.199353
46345	hsa-miR-1207-3p	6.4353	1.01563	1.14977	0.134138	1.10191	0.929355	1.2099	1.1598	1.24979	1.00658	1.12277
46806	hsa-miR-1227	6.05481	0.543465	0.544154	0.000688985	0.599886	0.487045	0.528159	0.587139	0.603674	0.503037	0.498763
46222	hsa-miR-1228*	6.24831	0.609719	1.00612	0.396406	0.597706	0.621732	1.10655	1.10761	1.30608	0.963473	0.546914
46624	hsa-miR-1236	6.90149	0.120876	0.139529	0.0186527	-0.0483326	0.290085	0.0642093	0.124103	0.367535	0.00714607	0.13465
42898	hsa-miR-124*	6.20713	-0.730829	-0.0875728	0.643256	-0.720559	-0.741099	-0.20046	0.108837	0.0800591	-0.0964919	-0.329809
46404	hsa-miR-1244	6.03277	0.85151	1.00151	0.149999	0.924083	0.778937	0.909456	1.21781	1.10961	0.973365	0.797307
148642	hsa-miR-1246	11.3714	-2.07889	-0.0789537	1.99994	-1.73952	-2.41825	-0.619778	-0.706584	0.154702	2.17411	-1.39722
145977	hsa-miR-1247	6.54967	-0.0251648	0.144643	0.169808	-0.0287811	-0.0215486	0.0344667	0.127618	0.0834569	0.185822	0.291854
46427	hsa-miR-1248	6.39476	-0.309632	-0.591119	-0.281487	-0.250071	-0.369193	-0.565546	-0.639555	-0.751633	-0.71469	-0.284171
46210	hsa-miR-1249	7.19295	1.77659	1.97395	0.197358	1.80618	1.747	2.01315	2.07018	2.10747	1.80393	1.87504
46214	hsa-miR-1250	6.11252	1.11413	1.12242	0.00828735	1.08314	1.14512	1.19457	1.15852	1.12274	1.09348	1.04278
46380	hsa-miR-1255a	7.68955	0.150827	-0.326949	-0.477776	-0.174368	0.476021	-0.242138	-0.391753	-0.0403886	-0.396165	-0.564302
17942	hsa-miR-125a-3p	6.5378	0.608861	0.849469	0.240608	0.663863	0.553858	0.854791	0.873999	1.00214	0.827693	0.688721
10928	hsa-miR-125a-5p	11.0147	-0.119384	-0.126735	-0.00735083	-0.129123	-0.109645	0.00322625	-0.0019443	-0.413861	-0.116763	-0.104331
30787	hsa-miR-125b	12.9995	-0.435119	-0.0779793	0.357139	-0.373519	-0.496718	0.00619877	0.0505333	-0.39017	0.00479818	-0.0612569
145838	hsa-miR-125b-1*	6.08258	-0.0753424	0.244905	0.320247	-0.122353	-0.0283321	0.239608	0.315232	0.202134	0.196442	0.27111
42845	hsa-miR-125b-2*	6.06251	0.0393192	-0.704199	-0.743518	-0.396838	0.475477	-0.605076	-0.743453	-0.805151	-0.781269	-0.586047
4610	hsa-miR-126	12.1427	0.595953	-0.224976	-0.820929	0.667394	0.524512	0.0304672	-0.0740638	-1.62644	0.0787743	0.466385
33596	hsa-miR-126*	9.89469	0.594466	-0.417556	-1.01202	0.634002	0.55493	-0.152326	-0.358049	-1.77682	-0.266067	0.465487
145975	hsa-miR-1260	14.9286	-0.131878	-0.202063	-0.0701842	-0.127001	-0.136756	-0.0444035	-0.424684	-0.199675	-0.29477	-0.0467794
147791	hsa-miR-1260b	15.3501	-0.309494	0.242085	0.551579	-0.30283	-0.316157	-0.00889375	0.306943	0.286587	0.485023	0.140768
46732	hsa-miR-1264	10.6313	0.322737	0.414401	0.091664	0.381686	0.263788	0.477591	0.399261	0.773926	0.133989	0.28724
46737	hsa-miR-1265	7.03552	0.15555	0.132377	-0.0231729	0.208667	0.102433	0.298315	0.185724	0.138959	-0.12578	0.16467
46558	hsa-miR-1268/hsa-miR-1268b	5.84465	0.761377	0.604364	-0.157013	0.839241	0.683513	0.843769	0.79036	0.489747	0.357881	0.540064
42829	hsa-miR-127-3p	6.28144	-0.397529	0.0782779	0.475807	-0.371222	-0.423836	-0.148108	-0.080887	0.228488	0.606423	-0.214526
46752	hsa-miR-1270	5.96807	0.304977	0.509174	0.204197	0.244494	0.365461	0.302941	0.527729	0.692217	0.495253	0.52773
46627	hsa-miR-1271	6.01318	0.247149	0.201516	-0.0456321	0.234304	0.259993	0.248865	0.25502	0.0631911	0.164121	0.276384
148263	hsa-miR-1273e	6.76568	-0.501292	-0.602537	-0.101245	-0.642934	-0.35965	-0.564937	-0.741209	-0.424047	-0.599415	-0.683078
46620	hsa-miR-1275	12.0358	-2.14083	0.960818	3.10165	-2.29363	-1.98803	0.743789	0.824655	2.71426	0.895171	-0.373785
33902	hsa-miR-128	6.25939	0.2597	0.192056	-0.0676445	0.335188	0.184212	0.266737	0.288216	0.0274014	0.0935641	0.28436
148675	hsa-miR-1280	15.0461	-0.0411577	0.0414921	0.0826498	0.0115634	-0.0938788	0.105836	0.00745369	-0.0150955	-0.0273729	0.13664
46634	hsa-miR-1281	6.28494	0.726175	0.842621	0.116446	0.806464	0.645887	0.854564	0.95768	0.908408	0.790478	0.701974
46336	hsa-miR-1284	6.59925	-0.0601269	-0.0405391	0.0195878	-0.0761312	-0.0441226	0.0487198	-0.0953337	-0.0724535	-0.136558	0.0529299
145981	hsa-miR-1285	6.57193	-0.19247	-0.547405	-0.354935	-0.23787	-0.147069	-0.489889	-0.694274	-0.602775	-0.452064	-0.498022
42571	hsa-miR-129*	8.23171	1.04644	-0.295786	-1.34223	0.934753	1.15813	0.116133	-0.0574036	-1.02612	-0.735517	0.223981
46921	hsa-miR-1290	10.8336	-2.60534	-0.00304297	2.6023	-2.3505	-2.86018	-0.568009	-0.740931	0.182073	2.59349	-1.48184
46416	hsa-miR-1293	6.03858	0.927832	0.692758	-0.235073	0.851918	1.00374	0.677528	0.547595	0.813151	0.834953	0.590563
46944	hsa-miR-1297	7.76259	0.417584	-0.807711	-1.2253	0.586234	0.248934	-0.676065	-0.866329	-1.93849	-0.65371	0.0960374
46381	hsa-miR-1298	6.46252	-0.558142	-0.172344	0.385798	-0.47645	-0.639834	-0.123876	-0.332225	-0.000656575	-0.46019	0.0552295
46788	hsa-miR-1299	6.7501	0.0721349	-0.103697	-0.175832	0.00901004	0.13526	-0.0472875	-0.193141	0.0324758	-0.154169	-0.156365
46215	hsa-miR-1301	6.29313	0.345767	0.596549	0.250782	0.390115	0.301419	0.492473	0.591275	0.716907	0.676448	0.505641
46479	hsa-miR-1304	6.68947	-0.656809	-0.535155	0.121653	-0.812862	-0.500756	-0.562395	-0.580895	-0.368075	-0.436606	-0.727806
42681	hsa-miR-1307	6.88402	0.249107	0.712263	0.463156	0.329987	0.168227	0.792518	0.711196	0.829953	0.487799	0.739848
10138	hsa-miR-130a	10.1919	0.0783812	0.369068	0.290687	0.223246	-0.0664841	0.552026	0.375368	-0.268598	0.587094	0.599451
10936	hsa-miR-130b	7.05517	0.112554	0.757255	0.6447	0.17931	0.045798	0.738469	0.760372	0.605319	1.22176	0.460351
46866	hsa-miR-1321	7.33443	0.268963	-0.24307	-0.512033	0.0706232	0.467303	-0.132769	-0.308246	0.0833821	-0.562601	-0.295113
146137	hsa-miR-133a	13.3806	0.535223	0.277161	-0.258063	0.345256	0.725191	0.309049	0.24876	0.134897	0.329946	0.363151
146160	hsa-miR-133b	13.8685	0.522286	0.245707	-0.276579	0.333687	0.710885	0.275166	0.208671	0.0695185	0.374541	0.300638
42839	hsa-miR-135a	6.95806	0.250257	-0.436303	-0.686561	0.22991	0.270605	-0.279833	-0.459815	-1.05721	-0.292655	-0.0920029
10943	hsa-miR-136	8.33808	-0.205189	0.0942969	0.299486	-0.173965	-0.236413	-0.0915881	-0.241275	0.238712	0.490518	0.0751179
42512	hsa-miR-136*	6.12924	-0.295967	-0.343882	-0.0479149	-0.312473	-0.279462	-0.292949	-0.476128	-0.606417	-0.0178752	-0.326043
42872	hsa-miR-138-1*	9.2752	0.706918	-0.349377	-1.05629	0.522889	0.890946	-0.0461179	-0.174066	-0.634415	-0.676973	-0.215311
145677	hsa-miR-139-5p	7.7486	0.21396	0.333032	0.119072	0.237722	0.190198	0.34282	0.469785	0.287472	0.205943	0.359137
42630	hsa-miR-140-3p	9.21271	-0.180948	0.451998	0.632946	-0.233367	-0.128529	0.429957	0.591229	0.194207	0.542269	0.502327
4700	hsa-miR-140-5p	7.67174	-0.0453561	-0.422185	-0.376829	-0.118096	0.0273836	-0.255129	-0.165108	-1.62511	0.124843	-0.190425
145798	hsa-miR-142-5p	7.29702	-1.66771	-0.574252	1.09346	-1.43878	-1.89664	-1.04804	-0.702877	-1.11956	0.677242	-0.678028
13177	hsa-miR-143	12.47	0.0224938	-0.264122	-0.286616	0.063743	-0.0187555	-0.222879	-0.129739	-1.09096	0.0138239	0.109142
46467	hsa-miR-143*	7.64043	-0.133985	0.207416	0.341401	-0.118848	-0.149122	0.22842	0.234546	0.295709	0.123751	0.154653
29802	hsa-miR-144	9.38114	-5.09214	-1.22632	3.86582	-4.68358	-5.50071	-1.27297	0.166743	-1.9253	-1.94333	-1.15674
42641	hsa-miR-145	10.7929	-0.168081	-0.0246778	0.143403	-0.218459	-0.117703	0.0361003	0.0766046	-0.401411	0.0170351	0.148281
31867	hsa-miR-145*	6.70515	-0.260262	-0.642827	-0.382565	-0.338233	-0.182292	-0.569025	-0.493336	-1.16727	-0.516177	-0.468325
146072	hsa-miR-1469	8.7976	-1.03213	-0.527228	0.504898	-1.586	-0.478252	-0.98778	-0.151608	-0.429412	-0.215942	-0.851399
10952	hsa-miR-146a	6.882	0.0524466	-0.201333	-0.253779	0.136185	-0.0312921	-0.360659	-0.189113	-0.428916	0.3899	-0.417876
42461	hsa-miR-146b-3p	6.38267	-0.570782	-0.7683	-0.197518	-0.787589	-0.353975	-0.75327	-0.952039	-0.682396	-0.580768	-0.873028
10306	hsa-miR-146b-5p	7.40547	-0.0240518	0.00311783	0.0271697	0.282677	-0.330781	-0.386039	-0.500622	-0.565758	1.40851	0.0595022
10955	hsa-miR-148a	6.68453	0.0885205	-0.39886	-0.487381	-0.0759459	0.252987	-0.409537	-0.565409	-0.910884	-0.120137	0.0116658
19585	hsa-miR-148b	8.07724	0.199408	0.364904	0.165496	0.227494	0.171323	0.353764	0.267234	0.311266	0.469113	0.423145
42810	hsa-miR-149	6.39296	0.226555	0.228868	0.00231269	0.285217	0.167893	0.243836	0.301562	0.175437	0.174881	0.248623
42486	hsa-miR-149*	8.79413	-0.897243	-0.177832	0.719411	-1.0501	-0.744382	-0.352806	-0.0778475	0.190995	-0.136802	-0.5127
145678	hsa-miR-150	8.13092	-0.313318	-0.488976	-0.175657	-0.619261	-0.00737501	-0.425377	-0.235037	-0.456286	-0.3862	-0.941978
17463	hsa-miR-151-3p	7.94059	0.152615	0.695671	0.543056	0.186823	0.118407	0.713779	0.774465	1.04695	0.525072	0.418083
11260	hsa-miR-151-5p	8.18705	0.295846	-0.201416	-0.497263	0.379005	0.212688	-0.0508056	-0.142494	-0.823218	-0.274858	0.284296
17676	hsa-miR-152	8.55308	0.313665	0.618033	0.304368	0.372706	0.254624	0.623387	0.669885	0.414894	0.562976	0.819023
145857	hsa-miR-154	5.80154	-0.243397	-0.18757	0.0558269	-0.241059	-0.245734	-0.131976	-0.267577	-0.168902	-0.037128	-0.332266
10964	hsa-miR-155	7.75313	-0.137348	1.20262	1.33997	-0.100094	-0.174602	1.16797	1.01933	1.9461	1.2185	0.661202
27720	hsa-miR-15a	9.87413	-0.0928184	-0.265453	-0.172634	-0.0578733	-0.127764	-0.136878	-0.115473	-1.16855	-0.0956495	0.18929
17280	hsa-miR-15b	8.29125	-0.364364	-0.712238	-0.347875	-0.221647	-0.507081	-0.667177	-0.521538	-1.52642	-0.541461	-0.304593
10967	hsa-miR-16	10.2482	-0.377989	-1.10287	-0.724879	-0.267981	-0.487997	-0.979748	-0.801637	-2.76641	-0.685867	-0.280682
46777	hsa-miR-17	8.35486	-0.403422	-0.25739	0.146032	-0.269509	-0.537334	-0.398057	-0.0213441	-0.863466	0.0969223	-0.101004
19588	hsa-miR-17*	6.59201	-0.108849	0.0306795	0.139528	-0.0738672	-0.14383	-0.0426603	0.178645	-0.0557035	0.301867	-0.228752
42865	hsa-miR-181a	9.73509	-0.0146955	0.730301	0.744996	-0.0142914	-0.0150997	0.639928	0.732282	0.966225	0.752296	0.560772
17928	hsa-miR-181a-2*	6.24197	0.0647259	0.186609	0.121883	0.115946	0.0135054	0.144333	0.329999	0.0677438	0.120628	0.270343
10972	hsa-miR-181b	7.71825	0.279617	0.548545	0.268928	0.337829	0.221406	0.548166	0.58149	0.540142	0.51029	0.562635
145636	hsa-miR-181d	7.62216	-0.0540107	0.0513217	0.105332	-0.0267551	-0.0812663	0.112993	0.161415	-0.247056	0.0799577	0.149299
46810	hsa-miR-1827	9.29699	0.0637379	-0.604336	-0.668074	0.00293376	0.124542	-0.558313	-0.804853	-0.647686	-0.649407	-0.361424
17953	hsa-miR-183*	6.28553	-0.567299	-0.163601	0.403698	-0.627382	-0.507216	-0.288861	-0.103073	-0.101531	0.0210216	-0.345564
42902	hsa-miR-185	8.50987	-0.0346133	0.284854	0.319467	-0.142827	0.0736005	0.362491	0.602543	0.355249	0.0124028	0.0915835
18739	hsa-miR-186	8.13716	0.028285	0.420862	0.392577	0.0272569	0.0293131	0.516372	0.484352	0.571594	0.0686937	0.463301
42614	hsa-miR-186*	5.99698	0.368329	0.383794	0.0154648	0.233715	0.502943	0.353837	0.461255	0.457271	0.340683	0.305923
145670	hsa-miR-18b	6.1906	-0.33746	-0.215173	0.122288	-0.262676	-0.412245	-0.318434	-0.0478699	-0.577606	0.0576246	-0.189578
27536	hsa-miR-190	7.43212	0.613317	-0.412335	-1.02565	0.851276	0.375357	-0.248118	-0.517173	-1.40541	-0.210962	0.319982
148687	hsa-miR-1908	9.54765	-1.44469	-0.51924	0.92545	-1.72004	-1.16933	-0.757822	-0.324783	-0.446243	-0.309509	-0.757841
146180	hsa-miR-1909	6.36323	-0.849936	-0.295811	0.554125	-1.04468	-0.655192	-0.546512	-0.153536	-0.15015	-0.153965	-0.474891
10985	hsa-miR-191	8.92515	-0.168497	0.267871	0.436368	-0.240742	-0.0962519	0.341003	0.240736	0.00433343	0.592017	0.161266
146103	hsa-miR-1913	7.01823	0.73693	0.644268	-0.0926629	0.803088	0.670773	0.680269	0.604394	0.680571	0.501506	0.754597
146091	hsa-miR-1914	5.71964	-0.499348	-0.262679	0.236669	-0.487757	-0.51094	-0.298797	-0.455929	-0.450435	0.173444	-0.281678
146068	hsa-miR-1915	6.09564	-0.0530044	0.101102	0.154107	-0.0681687	-0.0378401	-0.0923318	0.0320462	0.260002	0.349435	-0.0436402
10986	hsa-miR-193a-3p	9.23544	-0.54842	-0.410723	0.137698	-0.42658	-0.670261	-0.536222	-0.300233	-0.701858	-0.0869779	-0.428322
46443	hsa-miR-193a-5p	7.34326	0.0472072	0.391784	0.344577	0.17263	-0.0782152	0.266631	0.448817	0.341507	0.444103	0.457864
10987	hsa-miR-193b	8.38561	-0.316457	0.0237194	0.340176	-0.264016	-0.368897	-0.0394343	0.184034	-0.115791	0.177666	-0.0878778
42962	hsa-miR-193b*	6.44516	-0.56365	-0.291982	0.271668	-0.592492	-0.534807	-0.347831	-0.179623	-0.237592	-0.124777	-0.570086
13148	hsa-miR-195	10.0398	-0.283987	-0.486632	-0.202645	-0.159699	-0.408275	-0.2844	-0.151875	-1.68908	-0.388948	0.0811476
42723	hsa-miR-195*	5.9547	-0.373402	-0.291067	0.0823349	-0.420678	-0.326126	-0.290679	-0.257103	-0.0956574	-0.277241	-0.534654
42538	hsa-miR-196a*	7.48932	0.0722745	0.191104	0.11883	0.0893163	0.0552326	0.406271	0.161865	0.183025	0.347486	-0.143127
145889	hsa-miR-196b	6.04456	0.987428	1.12277	0.135338	1.02456	0.9503	1.1534	1.1261	1.22597	1.07773	1.03063
42783	hsa-miR-197	7.94101	0.0483965	0.176545	0.128149	0.13007	-0.0332768	0.331035	0.233904	0.0718503	-0.0724672	0.318405
146165	hsa-miR-1973	10.4766	-0.0556143	1.08457	1.14018	-0.383244	0.272016	1.80962	1.38832	2.10093	0.127033	-0.0030523
146140	hsa-miR-1976	6.51135	0.0499861	0.0439662	-0.00601995	-0.0179724	0.117945	0.123233	0.18021	0.0354372	-0.0904059	-0.0286439
10995	hsa-miR-199a-3p/hsa-miR-199b-3p	9.37354	-0.554686	-0.864523	-0.309837	-0.623063	-0.48631	-0.727391	-0.841724	-2.11115	-0.194181	-0.448172
29562	hsa-miR-199a-5p	10.0251	-0.842308	-0.436235	0.406074	-0.978654	-0.705962	-0.527496	-0.419771	-0.706526	0.0191052	-0.546485
19591	hsa-miR-199b-5p	8.28541	-0.471891	-0.734593	-0.262702	-0.512156	-0.431625	-0.612593	-0.64432	-1.95561	-0.321142	-0.1393
10997	hsa-miR-19a	9.19236	-0.141112	-0.0925865	0.0485252	-0.0601174	-0.222106	-0.126763	0.0934908	-0.674864	0.182668	0.0625361
10998	hsa-miR-19b	10.2272	-0.243469	0.0933394	0.336808	-0.16209	-0.324848	0.0278422	0.287972	-0.109328	0.293641	-0.0334308
11004	hsa-miR-203	6.04606	0.347295	0.326708	-0.0205873	0.379558	0.315032	0.353913	0.406151	0.315343	0.304623	0.253509
11005	hsa-miR-204	6.00191	0.212952	0.316202	0.10325	0.244628	0.181277	0.485311	0.328506	0.279614	0.148797	0.338782
145996	hsa-miR-205*	9.08472	0.178119	-0.0362245	-0.214343	0.143987	0.21225	0.0831496	-0.0304557	0.107113	-0.35404	0.0131105
5730	hsa-miR-208a	10.2197	0.553285	0.904513	0.351227	0.0930857	1.01349	1.23282	1.06169	1.09841	0.095706	1.03394
42555	hsa-miR-208b	13.1973	0.478023	0.88468	0.406656	0.436239	0.519808	1.00631	1.08991	1.13252	0.470576	0.72408
145845	hsa-miR-20a	7.98702	-0.0679492	-0.690201	-0.622252	0.164666	-0.300564	-0.803803	-0.556259	-1.83995	-0.0855109	-0.165485
42640	hsa-miR-20b	7.14306	-0.0580858	-0.50629	-0.448205	0.190156	-0.306328	-0.636407	-0.458092	-1.27731	-0.191848	0.0322031
17882	hsa-miR-20b*	6.05281	0.122857	0.27616	0.153303	0.16173	0.0839852	0.175391	0.298439	0.238282	0.315182	0.353509
147512	hsa-miR-21	9.13436	-0.313075	0.132234	0.445309	0.141417	-0.767567	0.112559	-0.281802	-1.23846	1.66729	0.401585
42524	hsa-miR-21*	6.164	-0.355049	0.0669521	0.422001	-0.0164494	-0.693649	-0.0481716	-0.301185	-0.309119	0.941584	0.051652
145852	hsa-miR-210	8.4885	-0.176232	1.02611	1.20234	-0.0921063	-0.260359	1.27359	1.08844	0.942575	0.996577	0.82935
146179	hsa-miR-2113	5.94874	-0.488548	-0.0738263	0.414721	-0.627646	-0.349449	-0.247158	-0.185639	0.614853	-0.201182	-0.350005
146044	hsa-miR-2115	6.35618	0.430872	0.341659	-0.0892126	0.48494	0.376804	0.361684	0.333347	0.382343	0.306168	0.324755
146161	hsa-miR-2115*	9.2902	0.651029	0.454203	-0.196825	0.674132	0.627926	0.633843	0.545146	0.484554	-0.10335	0.710824
146010	hsa-miR-2116	7.67887	0.0502806	-0.20436	-0.254641	-0.123321	0.223882	-0.132684	-0.358862	0.12229	-0.304617	-0.347928
11014	hsa-miR-214	9.59111	-0.526666	0.180822	0.707488	-0.621606	-0.431727	0.100341	0.221153	0.257937	0.407185	-0.0825066
145822	hsa-miR-214*	6.21943	-0.232079	-0.168589	0.0634901	-0.202333	-0.261825	-0.0952586	-0.189705	-0.325821	-0.0572738	-0.174884
11018	hsa-miR-218	6.58879	0.218103	-0.16986	-0.387963	0.178947	0.257259	-0.191967	-0.191567	-0.72515	0.15345	0.105934
42509	hsa-miR-219-5p	6.0323	0.123088	0.0523606	-0.0707274	0.20426	0.0419157	0.0915666	0.0732529	-0.0264027	-0.0303138	0.1537
11020	hsa-miR-22	13.8625	0.236821	0.704931	0.468109	0.244891	0.228752	0.766142	0.785304	0.81068	0.563363	0.599164
42532	hsa-miR-22*	9.0529	0.601586	0.191235	-0.410351	0.50659	0.696582	0.471867	0.190657	-0.340373	0.143062	0.490962
11022	hsa-miR-221	9.43252	1.24525	0.548452	-0.696797	1.42396	1.06654	0.380014	1.13516	0.126232	0.224062	0.876787
11023	hsa-miR-222	9.57309	0.837486	0.635232	-0.202254	1.01093	0.664042	0.506237	1.18087	0.469025	0.242761	0.77727
11024	hsa-miR-223	7.63386	-1.34982	-0.880044	0.469778	-0.764618	-1.93503	-1.47628	-1.4492	-1.85545	0.538136	-0.157418
42460	hsa-miR-223*	6.00632	1.0751	1.26823	0.193137	1.0883	1.06189	1.28953	1.38765	1.40886	1.21852	1.0366
42566	hsa-miR-224	6.60559	-0.033408	-0.528852	-0.495444	0.211319	-0.278135	-0.582372	-0.472802	-1.07644	-0.40045	-0.112197
146163	hsa-miR-224*	6.90463	-0.556679	-0.0934755	0.463204	-0.410311	-0.703047	-0.410741	0.0946148	0.0416066	-0.134656	-0.0582025
148247	hsa-miR-2355-3p	6.73388	-0.021497	-0.234845	-0.213348	-0.0983636	0.0553696	-0.119544	-0.30957	-0.281391	-0.141974	-0.321744
42744	hsa-miR-23a	12.5848	-0.0821268	0.283917	0.366043	-0.193532	0.0292785	0.288729	0.298596	0.0285941	0.520894	0.282771
42638	hsa-miR-23a*	6.58753	0.827993	0.979545	0.151553	0.959329	0.696656	0.940475	0.921473	1.03249	0.925232	1.07805
145841	hsa-miR-23b	12.9064	0.262818	-0.211749	-0.474567	0.285908	0.239729	-0.0497545	-0.102788	-1.17594	-0.0138532	0.283588
148217	hsa-miR-23c	10.1105	0.153164	-0.0739262	-0.22709	0.260939	0.0453897	0.287463	0.250158	-0.626316	-0.552254	0.271318
17506	hsa-miR-24	12.841	0.292626	0.189397	-0.103228	0.261945	0.323306	0.350038	0.285555	-0.523782	0.323541	0.511635
146043	hsa-miR-24-1*	8.22641	0.640211	-0.0554833	-0.695694	0.688515	0.591906	0.233689	0.142691	-0.81534	-0.169493	0.331036
42950	hsa-miR-24-2*	6.88205	0.229431	-0.258473	-0.487904	0.231519	0.227344	-0.160069	-0.0759676	-0.978244	-0.0816272	0.00354233
42682	hsa-miR-25	7.72247	-0.416934	-0.0296482	0.387286	-0.389441	-0.444427	-0.0651371	0.0892319	-0.168561	0.000886849	-0.00466171
42929	hsa-miR-25*	7.46724	-0.577251	-0.21709	0.360162	-0.793864	-0.360639	-0.297396	-0.17609	0.01496	-0.0876567	-0.539266
147198	hsa-miR-26a	9.57131	0.0752521	0.00842692	-0.0668252	0.145914	0.00459059	0.224393	0.181628	-0.549496	-0.0626155	0.248226
146008	hsa-miR-26b	10.2328	0.165668	-0.953963	-1.11963	0.303466	0.0278692	-0.656051	-0.914928	-2.51378	-0.600291	-0.0847677
42523	hsa-miR-26b*	5.9342	0.288329	0.346032	0.057703	0.340593	0.236065	0.522621	0.262938	0.218894	0.220054	0.505653
46483	hsa-miR-27a	10.0488	0.381665	-0.448171	-0.829835	0.361363	0.401966	-0.390152	-0.371016	-1.68288	-0.0186529	0.221851
147199	hsa-miR-27b	11.1719	0.460777	0.00690431	-0.453872	0.5509	0.370653	0.221663	0.139087	-0.728391	-0.0996797	0.501842
42823	hsa-miR-27b*	6.6676	0.293419	0.428451	0.135032	0.34963	0.237209	0.569068	0.564344	0.464599	0.211817	0.332429
145714	hsa-miR-28-3p	6.70632	0.000702548	0.361753	0.36105	0.0382821	-0.036877	0.40593	0.402837	0.432031	0.35355	0.214416
146049	hsa-miR-28-5p	6.97572	0.234945	-0.19254	-0.427485	0.327278	0.142613	-0.0540635	-0.0391836	-0.845323	-0.240906	0.216778
147898	hsa-miR-2861	5.87497	0.558942	0.402977	-0.155965	0.42407	0.693814	0.446463	0.0722868	0.499481	0.629228	0.367427
146100	hsa-miR-296-5p	7.08975	1.17027	1.24073	0.0704577	1.21569	1.12485	1.15113	1.09505	1.37232	1.15136	1.43378
46264	hsa-miR-298	6.54467	-0.174051	-0.26635	-0.0922995	-0.452622	0.10452	-0.279322	-0.297717	0.203557	-0.496082	-0.462186
148633	hsa-miR-299-5p	9.68743	-0.852025	-0.589303	0.262723	-1.24531	-0.45874	-1.01547	-0.258909	-0.52471	-0.576444	-0.570978
11039	hsa-miR-29a	13.0944	0.158884	0.0994925	-0.0593913	0.184568	0.133199	0.38186	0.319001	-0.581056	-0.103418	0.481076
145638	hsa-miR-29a*	7.33918	0.263652	0.342481	0.0788297	0.204921	0.322382	0.556742	0.500392	-0.0961412	0.259213	0.492202
11040	hsa-miR-29b	12.6924	0.225024	0.126515	-0.0985087	0.108849	0.341198	0.400445	0.506391	-0.745665	-0.181881	0.653285
17810	hsa-miR-29b-1*	6.74604	0.923232	0.19313	-0.730102	0.799622	1.04684	0.272197	-0.593838	0.562556	0.556875	0.167858
42792	hsa-miR-29b-2*	6.68109	0.36855	0.0442155	-0.324334	0.360086	0.377013	0.208344	0.0320655	-0.191376	-0.03382	0.205864
11041	hsa-miR-29c	12.4921	0.370234	0.280854	-0.0893796	0.392857	0.34761	0.534722	0.553206	-0.0982276	-0.0956472	0.510216
14300	hsa-miR-29c*	8.36603	0.409324	0.372874	-0.03645	0.494511	0.324136	0.606745	0.558494	0.233933	-0.0836393	0.548836
42513	hsa-miR-300	7.39369	-0.32312	-0.97658	-0.653461	-0.806471	0.160232	-0.801969	-1.22705	-0.844846	-0.852763	-1.15628
13143	hsa-miR-301a	7.27597	0.327981	0.228401	-0.0995805	0.368406	0.287556	0.40811	0.444136	-0.363652	0.16981	0.483599
147203	hsa-miR-302a	7.77594	0.279375	0.232545	-0.0468305	0.153208	0.405542	0.251815	-0.103971	0.827469	0.132347	0.0550639
11043	hsa-miR-302b	6.58281	1.34036	1.34408	0.00372382	1.43212	1.24859	1.35552	1.43535	1.47632	1.18847	1.26474
11045	hsa-miR-302c*	6.70164	0.12461	0.254631	0.130022	0.120875	0.128344	0.14665	0.274621	0.35216	0.307205	0.19252
27838	hsa-miR-302d	5.82768	0.330244	0.336948	0.00670372	0.343413	0.317076	0.44339	0.532895	0.229181	0.21303	0.266245
45764	hsa-miR-302e	6.16443	-0.0714762	-0.169166	-0.0976899	-0.0976265	-0.0453259	-0.12514	-0.0369857	-0.179738	-0.376809	-0.127159
146086	hsa-miR-30a	10.8501	0.597112	0.26735	-0.329763	0.601723	0.592502	0.503757	0.382245	-0.209685	0.0467434	0.613688
19595	hsa-miR-30a*	7.88424	0.343595	0.618442	0.274847	0.301081	0.386109	0.821191	0.681159	0.683995	0.364147	0.54172
146112	hsa-miR-30b	11.6783	0.634427	-0.325031	-0.959458	0.659888	0.608966	-0.076505	-0.303455	-1.26618	-0.248766	0.269748
42923	hsa-miR-30c	11.9214	0.412522	-0.120724	-0.533246	0.518525	0.306519	0.0419927	-0.116454	-0.719435	-0.103435	0.293712
42702	hsa-miR-30c-1*	6.0109	-0.647421	-0.202674	0.444746	-0.67295	-0.621891	-0.334522	-0.279277	0.217525	-0.00209235	-0.615005
46626	hsa-miR-30c-2*	6.01261	0.325276	0.396805	0.0715289	0.291139	0.359412	0.398052	0.551948	0.536499	0.27891	0.218614
19596	hsa-miR-30d	11.3016	0.535521	0.759139	0.223618	0.486476	0.584566	1.01356	0.857651	0.706055	0.374357	0.844074
17853	hsa-miR-30d*	6.23784	0.511785	0.585848	0.0740629	0.43053	0.59304	0.61493	0.677143	0.727399	0.460939	0.448827
28191	hsa-miR-30e	11.002	0.685098	0.019184	-0.665914	0.819778	0.550417	0.226607	0.20438	-0.785715	-0.113763	0.564411
145676	hsa-miR-30e*	9.65032	0.685657	0.268224	-0.417433	0.749483	0.62183	0.521044	0.292981	-0.190865	0.0845814	0.633377
147820	hsa-miR-3133	7.4323	0.814404	-1.25749	-2.07189	0.863045	0.765764	-0.928399	-1.0976	-1.33456	-1.737	-1.18988
147988	hsa-miR-3135	6.15734	-0.149782	-0.249055	-0.0992726	-0.303008	0.00344358	-0.240079	-0.236965	-0.0430584	-0.379467	-0.345705
147923	hsa-miR-3142	5.91917	-0.519997	-0.123215	0.396782	-0.498363	-0.541632	-0.156913	-0.134142	-0.153042	0.160682	-0.332661
147904	hsa-miR-3148	6.525	-0.104215	-0.309984	-0.205769	-0.234637	0.0262068	-0.320104	-0.414759	-0.0635306	-0.354442	-0.397086
147806	hsa-miR-3149	7.41378	-0.0963765	-0.336617	-0.24024	-0.283195	0.0904415	-0.28445	-0.649278	-0.0140672	-0.372866	-0.362422
147739	hsa-miR-3161	6.43516	-0.0924804	-0.311335	-0.218854	-0.178657	-0.00630394	-0.227933	-0.303199	-0.135382	-0.570841	-0.319318
147891	hsa-miR-3175	8.03927	-0.0581465	0.521646	0.579792	-0.062921	-0.0533721	0.353205	0.327269	0.497198	1.05624	0.374315
147595	hsa-miR-3178	7.12432	-1.03398	-0.151542	0.882441	-1.1944	-0.873562	-0.804804	0.0376662	-0.307563	0.650453	-0.333463
147667	hsa-miR-3182	11.2042	-1.05559	-0.505409	0.550184	-1.3963	-0.714889	-1.34982	-0.82762	-0.347709	0.654317	-0.656211
147805	hsa-miR-3183	6.32236	-0.237693	-0.479962	-0.24227	-0.317751	-0.157634	-0.397504	-0.464182	-0.539434	-0.539365	-0.459326
148000	hsa-miR-3195	6.12552	-0.506588	-0.230251	0.276337	-0.583338	-0.429837	-0.320181	-0.143355	-0.0801277	-0.0985822	-0.509007
147817	hsa-miR-3196	8.39809	-1.44284	-0.54729	0.895546	-1.53224	-1.35344	-0.525842	-0.50637	-0.148351	-0.696028	-0.859858
11053	hsa-miR-32	7.38096	0.567521	-0.886295	-1.45382	0.719542	0.4155	-0.730837	-0.742336	-1.94322	-0.778889	-0.236194
29575	hsa-miR-32*	8.34714	-0.201661	-0.314958	-0.113296	-0.417064	0.0137411	-0.326506	-0.575947	0.185709	-0.228559	-0.629486
147851	hsa-miR-3201	6.0966	-0.0723129	-0.343953	-0.27164	-0.271087	0.126461	-0.507179	-0.378629	-0.327456	-0.0164329	-0.490067
146158	hsa-miR-3202	7.83094	-1.38585	-0.630417	0.755429	-1.71219	-1.0595	-1.25506	-0.65097	-0.781239	0.627856	-1.09268
27533	hsa-miR-320a	9.74892	-0.175123	0.861678	1.0368	-0.166377	-0.183869	0.74477	0.685439	0.979553	1.22552	0.673105
46324	hsa-miR-320b	9.7368	-0.208302	0.894143	1.10244	-0.229986	-0.186617	0.714472	0.727516	0.961986	1.2574	0.809338
46228	hsa-miR-320c	9.42004	-0.195993	0.888833	1.08483	-0.227231	-0.164755	0.730422	0.76334	0.98183	1.2636	0.704975
46870	hsa-miR-320d	9.2172	-0.175257	0.826806	1.00206	-0.258035	-0.0924789	0.706418	0.710838	0.973586	1.20207	0.54112
147691	hsa-miR-320e	9.34524	-0.364455	0.755098	1.11955	-0.491042	-0.237869	0.616429	0.664068	0.874778	1.20321	0.417008
42457	hsa-miR-323-5p	5.96024	1.18391	1.38595	0.202036	1.14176	1.22606	1.3305	1.47758	1.50309	1.31522	1.30334
145708	hsa-miR-324-3p	6.4979	0.222923	0.38846	0.165537	0.313309	0.132537	0.415699	0.421944	0.452799	0.271246	0.380611
42693	hsa-miR-326	6.51516	-0.234415	0.166805	0.40122	-0.159001	-0.309828	0.0555711	0.247667	0.513452	0.0842025	-0.0668666
145640	hsa-miR-328	6.45875	-0.22934	-0.00783437	0.221506	-0.191651	-0.267029	0.0906757	0.0762172	0.099656	-0.116127	-0.189594
42887	hsa-miR-331-3p	8.22435	0.176812	0.0386621	-0.138149	0.334637	0.0189861	0.275217	0.152009	-0.297441	-0.134323	0.197848
11065	hsa-miR-335	6.78825	-1.11418	-1.18953	-0.0753493	-1.03069	-1.19767	-1.51714	-0.947065	-2.08445	-0.590354	-0.808625
145745	hsa-miR-335*	9.47295	0.0358833	-0.0025304	-0.0384137	-0.014469	0.0862356	-0.19865	-0.0322489	0.121283	-0.0198515	0.116815
42673	hsa-miR-337-3p	6.50148	0.0603918	0.268624	0.208232	0.157655	-0.036871	0.194086	0.188748	0.207528	0.61661	0.136148
17944	hsa-miR-337-5p	6.47633	-0.036729	0.0452285	0.0819576	0.0402592	-0.113717	-0.08591	-0.14088	-0.209781	0.721917	-0.0592022
42592	hsa-miR-338-3p	8.08973	0.601711	0.18081	-0.420901	0.734746	0.468676	0.299648	0.0923472	-0.197107	0.0172998	0.691861
17825	hsa-miR-338-5p	5.76037	-0.0458108	0.138775	0.184586	-0.0275058	-0.0641157	0.159467	0.166044	0.10915	0.285126	-0.0259104
42739	hsa-miR-339-5p	6.49675	-0.508494	-0.109612	0.398883	-0.546279	-0.47071	-0.0232373	-0.040265	-0.374941	0.202592	-0.312207
145859	hsa-miR-33a	7.63796	0.240873	-0.0649273	-0.3058	0.267162	0.214583	-0.161401	0.00495938	-0.279084	0.100923	0.00996623
145950	hsa-miR-33b	6.24609	-0.383944	-0.208181	0.175763	-0.370926	-0.396962	-0.237661	-0.173597	-0.236977	0.0947821	-0.487452
29872	hsa-miR-340	7.95981	-0.0780865	0.0712305	0.149317	-0.134728	-0.0214455	0.153965	0.0141999	0.0724318	0.190911	-0.0753557
32884	hsa-miR-342-3p	7.44146	0.178459	-0.138255	-0.316714	0.306221	0.0506978	-0.0094534	-0.123822	-0.713319	0.00501925	0.150301
27217	hsa-miR-34a	8.18185	-0.588044	-0.653152	-0.0651085	-0.57753	-0.598557	-0.408301	-0.616157	-1.5242	-0.51224	-0.204867
148420	hsa-miR-3607-3p	9.58669	0.121265	0.348455	0.227189	0.401678	-0.159147	0.612598	0.422131	0.45656	0.243855	0.00712733
148418	hsa-miR-3607-5p	8.21936	0.226284	0.0593561	-0.166928	0.365086	0.0874828	0.296328	0.154707	-0.0886363	-0.0144673	-0.0511507
145865	hsa-miR-361-3p	7.47408	0.678755	0.730523	0.0517678	0.695843	0.661667	0.585214	0.622906	0.834441	0.812666	0.797387
14301	hsa-miR-361-5p	8.57369	0.167439	0.402656	0.235217	0.235642	0.0992365	0.564034	0.499512	0.317834	0.186974	0.444925
148465	hsa-miR-3611	7.12933	-0.291816	-0.568426	-0.27661	-0.568456	-0.015175	-0.685642	-0.787748	-0.424446	0.0731734	-1.01747
148493	hsa-miR-3613-3p	13.0447	0.126755	0.0698058	-0.0569492	0.129164	0.124346	-0.0352841	-0.201833	0.477105	0.289977	-0.180937
147334	hsa-miR-3613-5p	5.91094	0.37858	0.177378	-0.201202	0.43532	0.321839	0.161521	0.131921	-0.0316981	0.132354	0.492791
148413	hsa-miR-3614-3p	6.72937	1.31016	1.07545	-0.234707	1.31866	1.30167	1.18977	1.18266	1.14546	0.936313	0.923069
148125	hsa-miR-3618	6.11631	-0.464783	-0.470596	-0.00581224	-0.521144	-0.408422	-0.588815	-0.523216	-0.485407	-0.288675	-0.466866
17893	hsa-miR-362-3p	5.88948	-0.108486	-0.524554	-0.416069	-0.157991	-0.0589807	-0.489902	-0.35114	-1.06246	-0.24071	-0.478564
42503	hsa-miR-362-5p	6.43124	0.410431	0.699818	0.289387	0.454121	0.36674	0.569587	0.698495	0.691151	0.744395	0.79546
148317	hsa-miR-3621	7.582	-1.31878	-0.650963	0.667814	-1.54384	-1.09371	-0.931076	-0.692862	-0.54865	-0.140581	-0.941646
148132	hsa-miR-3622a-3p	6.72702	0.417335	-0.0658806	-0.483216	0.340223	0.494447	0.22277	-0.0396424	-0.284461	-0.388812	0.160743
11077	hsa-miR-363	6.28876	-0.109702	0.0912693	0.200971	0.087031	-0.306435	-0.14162	0.0469879	-0.0225917	0.0525382	0.521032
27544	hsa-miR-363*	7.276	0.0821955	-0.0247043	-0.1069	0.130422	0.0339686	0.167243	0.0140965	-0.179989	-0.261383	0.136511
148481	hsa-miR-3646	9.88311	0.1602	0.256705	0.0965044	0.145829	0.174572	0.284772	0.147808	0.578496	0.0582001	0.214248
148269	hsa-miR-3647-3p	8.72827	-0.146878	0.368673	0.515552	0.0176851	-0.311442	0.479099	0.41962	0.23192	0.57266	0.140068
148319	hsa-miR-3647-5p	5.95946	-0.292415	-0.346905	-0.05449	-0.20682	-0.378009	-0.32148	-0.308343	-0.613461	-0.114832	-0.376406
11078	hsa-miR-365	9.02817	0.116186	-0.69092	-0.807105	0.371608	-0.139237	-0.707511	-0.670961	-1.50815	-0.407292	-0.160681
148327	hsa-miR-3651	6.17549	-0.248361	-0.18151	0.0668509	-0.196279	-0.300443	-0.141334	-0.208066	-0.550314	0.0806926	-0.0885292
148377	hsa-miR-3653	8.71113	0.28979	0.813546	0.523756	0.339456	0.240124	0.784534	0.800891	1.118	0.894708	0.469595
148379	hsa-miR-3654	9.06515	-0.222241	0.390026	0.612267	-0.228496	-0.215985	0.352688	0.334693	0.749173	0.553192	-0.0396137
148228	hsa-miR-3656	8.43399	-1.11822	-0.087221	1.03099	-1.27102	-0.965407	-0.32708	0.0560572	0.24099	-0.024829	-0.381244
148597	hsa-miR-3663-5p	6.29976	-0.533482	-0.245575	0.287906	-0.448633	-0.618331	-0.104503	-0.461532	-0.181501	-0.110718	-0.369622
148206	hsa-miR-3664-5p	5.98004	0.922229	0.82709	-0.0951389	0.906168	0.93829	0.862869	0.946352	0.901929	0.768882	0.655416
148264	hsa-miR-3665	6.04735	-0.604602	-0.259451	0.345152	-0.677133	-0.532072	-0.297384	-0.149759	-0.222499	-0.364866	-0.262744
148234	hsa-miR-3667-5p	8.72732	0.054066	-0.685275	-0.739341	-0.104326	0.212458	-0.550864	-0.792527	-0.205176	-0.92592	-0.951891
148214	hsa-miR-3675-3p	7.24484	0.343474	0.171791	-0.171683	0.225534	0.461415	0.236766	0.11722	0.20162	0.0354424	0.267909
148410	hsa-miR-3676	9.20128	0.156385	0.145944	-0.0104407	0.059162	0.253608	0.202716	0.0887755	0.30297	0.000958539	0.134301
148038	hsa-miR-3679-3p	8.64453	1.70297	1.71654	0.0135732	1.72172	1.68421	1.72122	1.48619	2.03037	1.70129	1.64363
148599	hsa-miR-3680	7.00832	0.996205	-0.273907	-1.27011	0.849898	1.14251	-0.242713	-0.224114	0.0629416	-0.66307	-0.302579
148032	hsa-miR-3685	9.06838	0.805774	-0.670395	-1.47617	0.413679	1.19787	-0.503272	-0.833536	0.0641067	-1.15066	-0.928618
148156	hsa-miR-3686	10.9407	-0.549014	-0.0062044	0.542809	-0.62713	-0.470897	0.10179	-0.00356468	0.338033	-0.0953702	-0.37191
148085	hsa-miR-3687	6.52135	-0.926911	-0.337575	0.589336	-0.847551	-1.00627	-0.805509	-0.260958	-0.249724	0.132231	-0.503917
148077	hsa-miR-3690	6.22747	-0.0261335	-0.416307	-0.390174	-0.188584	0.136317	-0.446035	-0.386254	-0.505041	-0.506084	-0.238123
145844	hsa-miR-374a	7.89171	0.315413	-0.70472	-1.02013	0.386689	0.244137	-0.530156	-0.703449	-1.99427	-0.436663	0.140941
148098	hsa-miR-374b	8.83558	0.147428	-0.0968196	-0.244248	0.221255	0.0736012	0.130338	0.00297294	-0.714724	-0.139985	0.2373
148430	hsa-miR-374c	8.6261	0.144796	-0.171559	-0.316355	0.22411	0.0654827	0.0336306	-0.129855	-0.891138	-0.240537	0.370104
146009	hsa-miR-376a	6.15399	-0.486044	-0.283501	0.202543	-0.464831	-0.507257	-0.454825	-0.561953	-0.320601	0.154377	-0.234503
42629	hsa-miR-376c	6.99353	-0.0679152	0.0214471	0.0893623	0.0317806	-0.167611	-0.142652	-0.133721	-0.135239	0.489479	0.0293676
11091	hsa-miR-377	7.19637	-0.422733	-0.0426711	0.380062	-0.376732	-0.468734	-0.306303	-0.306354	-0.0145654	0.590124	-0.176256
148668	hsa-miR-378	12.1666	0.557001	0.58186	0.0248584	0.615129	0.498873	0.394951	0.53494	1.24917	0.269562	0.460675
11092	hsa-miR-378*	7.24867	0.196652	0.0271535	-0.169498	0.16681	0.226493	-0.0525946	0.03733	0.453094	-0.216439	-0.0856226
11105	hsa-miR-378/hsa-miR-378c/hsa-miR-378d	11.6874	0.543136	0.590761	0.0476247	0.594118	0.492153	0.405313	0.565149	1.19801	0.249111	0.536222
147530	hsa-miR-378b	9.69786	0.503159	0.504714	0.001555	0.540481	0.465838	0.363739	0.484633	1.10931	0.110907	0.454984
147755	hsa-miR-378c	11.2814	0.565464	0.615658	0.0501931	0.632722	0.498206	0.321227	0.564129	1.33508	0.21603	0.641818
145832	hsa-miR-381	5.82373	-0.653523	-0.252326	0.401197	-0.67282	-0.634225	-0.291603	-0.48734	-0.351843	0.487681	-0.618526
145643	hsa-miR-382	5.94734	0.118897	0.154079	0.0351822	0.162076	0.0757181	0.102287	-0.0480745	0.241101	0.508192	-0.0331091
148216	hsa-miR-3907	6.17012	-0.16137	-0.204017	-0.0426468	-0.0989489	-0.223792	-0.180675	-0.188407	-0.179111	-0.369885	-0.102008
148361	hsa-miR-3911	6.27518	0.21487	0.176275	-0.0385948	0.178284	0.251456	0.194157	0.0899692	0.40803	0.117384	0.0718355
148495	hsa-miR-3915	7.15886	-0.376399	-0.411814	-0.0354156	-0.579975	-0.172822	-0.59314	-0.627211	-0.0911226	-0.158997	-0.588602
148049	hsa-miR-3924	6.48726	0.240214	0.0867568	-0.153457	0.126429	0.353998	0.150278	0.0406543	0.20651	-0.0236225	0.0599642
148064	hsa-miR-3926	6.39819	0.0231163	-0.221536	-0.244652	-0.199077	0.24531	-0.241878	-0.238885	-0.0386368	-0.362121	-0.226158
148265	hsa-miR-3935	7.19174	0.207088	-0.551166	-0.758254	-0.0889025	0.503079	-0.357179	-0.631648	-0.25859	-0.871041	-0.637372
148285	hsa-miR-3941	7.73161	0.661753	-0.367972	-1.02972	0.586316	0.737189	-0.241016	-0.525923	-0.566463	-0.555131	0.048676
148577	hsa-miR-3943	6.25156	0.542426	0.601709	0.0592832	0.554701	0.530151	0.661441	0.510485	0.689716	0.611001	0.535902
11104	hsa-miR-422a	9.23728	0.580753	0.605428	0.024675	0.606119	0.555386	0.422666	0.443255	1.23417	0.328993	0.598051
42730	hsa-miR-423-3p	8.46722	-0.0382843	0.28254	0.320824	0.0493867	-0.125955	0.340722	0.388635	0.180402	0.232798	0.270142
27565	hsa-miR-423-5p	9.26199	-0.535037	0.179092	0.714129	-0.621631	-0.448443	0.151372	0.257096	0.456676	0.103067	-0.0727511
42965	hsa-miR-424	8.62029	0.510763	-0.175332	-0.686096	0.43928	0.582246	-0.192579	-0.483159	-0.754378	0.110325	0.44313
17608	hsa-miR-425	7.30016	0.53273	0.888767	0.356037	0.645356	0.420104	0.827223	0.829519	0.657366	0.995963	1.13376
11108	hsa-miR-425*	5.98331	-0.203151	0.177691	0.380841	-0.182224	-0.224077	0.170101	0.204806	0.193838	0.305922	0.0137875
147631	hsa-miR-4258	7.46986	0.658074	0.852902	0.194827	0.688634	0.627515	0.755113	0.664579	1.03033	0.953646	0.860839
147942	hsa-miR-4268	9.81207	-0.680159	-1.77774	-1.09758	-1.39661	0.0362964	-1.41547	-1.95538	-1.48443	-1.58095	-2.45246
147751	hsa-miR-4274	6.90587	1.46179	1.57852	0.116736	1.57488	1.34869	1.59378	1.62728	1.76344	1.45585	1.45227
147743	hsa-miR-4275	7.8984	0.183271	0.00712328	-0.176148	0.226239	0.140303	0.104495	0.0208991	0.0416571	-0.203356	0.0719214
147767	hsa-miR-4279	10.8832	-0.360941	-1.97261	-1.61167	-1.20011	0.478231	-1.68674	-2.05644	-1.83485	-1.8077	-2.47729
147636	hsa-miR-4284	14.123	0.921074	-0.657799	-1.57887	0.738681	1.10347	-0.129042	-0.367843	-1.96615	-0.747149	-0.0788097
147604	hsa-miR-4285	9.69355	-1.55496	-0.590764	0.964192	-1.74171	-1.3682	-0.757682	-0.311853	-0.434967	-0.590974	-0.858345
147744	hsa-miR-4286	14.1284	0.0213666	0.199898	0.178531	0.104291	-0.0615577	0.243772	0.124437	0.351072	0.152019	0.12819
147588	hsa-miR-4288	10.0142	1.17767	0.89092	-0.286747	1.39911	0.956222	0.556823	1.55571	1.00543	0.431244	0.905389
147735	hsa-miR-4289	7.74047	-0.0368222	-0.238396	-0.201574	0.0205281	-0.0941724	-0.0975313	-0.127073	-0.894446	-0.21077	0.137839
147920	hsa-miR-4290	9.4143	-1.09482	-1.67249	-0.577671	-1.74722	-0.442419	-1.347	-1.91292	-1.45565	-1.51531	-2.13158
147616	hsa-miR-4291	10.3884	-0.0154139	0.51292	0.528334	-0.0325834	0.00175557	0.582048	0.583368	0.438381	0.412069	0.548734
147600	hsa-miR-4292	6.33247	0.221971	0.448234	0.226264	0.203199	0.240742	0.266217	0.369318	0.570306	0.797923	0.237406
147632	hsa-miR-4297	6.17508	-0.0874155	-0.37344	-0.286024	-0.163785	-0.0110459	-0.316501	-0.44807	-0.347049	-0.391356	-0.364222
147614	hsa-miR-4299	8.51411	-0.337309	-0.253789	0.0835195	-0.495577	-0.179041	-0.112734	-0.201649	-0.103754	-0.343461	-0.507348
147861	hsa-miR-4301	12.8284	-0.0637411	0.573324	0.637065	0.076791	-0.204273	0.685424	0.740521	0.681408	0.236753	0.522513
147722	hsa-miR-4306	9.25605	-0.787963	-0.139935	0.648028	-1.0047	-0.571228	-0.395753	-0.0832017	-0.16131	0.432636	-0.492045
147947	hsa-miR-4308	6.20162	-0.188626	-0.355333	-0.166708	-0.259059	-0.118192	-0.263767	-0.498534	-0.323122	-0.52343	-0.167813
147907	hsa-miR-4312	6.51858	0.570809	0.633804	0.0629957	0.566016	0.575601	0.620549	0.632512	0.748243	0.53128	0.636438
147776	hsa-miR-4317	8.8105	0.294289	-0.171983	-0.466272	0.295932	0.292647	0.0271367	-0.0655789	-0.925216	-0.050817	0.154561
147671	hsa-miR-4323	6.1074	0.326777	0.38849	0.0617125	0.480253	0.173302	0.413744	0.299142	0.533771	0.38344	0.312352
147847	hsa-miR-4324	8.78862	-0.386426	-0.257914	0.128512	-0.372726	-0.400126	-0.10738	-0.161791	-0.380977	-0.375188	-0.264235
147771	hsa-miR-4328	10.8653	-0.177748	-0.0132543	0.164494	-0.222004	-0.133492	0.0594682	0.103435	-0.346997	-0.0242829	0.142105
147926	hsa-miR-4329	7.44756	-0.199042	-0.229276	-0.030234	-0.23335	-0.164733	-0.139529	-0.219284	-0.273849	-0.28637	-0.227347
18847	hsa-miR-450a	6.7269	0.730871	0.621956	-0.108915	0.7266	0.735142	0.67107	0.519984	0.567384	0.553598	0.797744
42866	hsa-miR-451	10.6472	-5.73554	-2.10458	3.63095	-4.99081	-6.48026	-2.4218	-0.975117	-4.11276	-1.4162	-1.59704
29379	hsa-miR-452	7.40911	-0.151133	0.167149	0.318282	0.281995	-0.584261	0.342272	0.531404	-0.143187	0.26619	-0.160932
28950	hsa-miR-455-3p	5.97869	0.134072	-0.63569	-0.769762	0.16686	0.101283	-0.541063	-0.631198	-0.999661	-0.540688	-0.465842
13179	hsa-miR-455-5p	6.58863	0.276255	0.20013	-0.076125	0.305538	0.246972	0.30049	0.29625	0.097861	0.173799	0.132248
148682	hsa-miR-483-3p	10.5867	-0.572898	-1.7183	-1.1454	-1.34724	0.201445	-1.35782	-2.00975	-1.09512	-1.62929	-2.49952
42654	hsa-miR-483-5p	7.35898	-1.2206	-0.0196505	1.20095	-1.38933	-1.05187	-0.701217	-0.388825	0.0614376	0.550075	0.380277
145753	hsa-miR-484	6.82644	0.358748	0.404637	0.0458884	0.472575	0.244922	0.437995	0.469449	0.400383	0.27521	0.440147
42694	hsa-miR-485-3p	6.62005	-0.692816	-0.522921	0.169895	-0.762837	-0.622794	-0.67461	-0.548432	-0.299751	-0.351096	-0.740717
42480	hsa-miR-485-5p	6.03287	0.936519	1.08447	0.147955	0.930135	0.942903	1.04057	1.16539	1.23686	1.11145	0.86811
32946	hsa-miR-486-5p	8.60204	-0.0118185	0.268435	0.280253	0.0417132	-0.0653503	0.0960318	0.239618	0.541928	0.180577	0.284019
14285	hsa-miR-487b	9.00023	-0.0183518	0.0690134	0.0873653	0.019983	-0.0566867	0.0988508	-0.0192054	0.315697	-0.0701734	0.0198984
42704	hsa-miR-488	6.15215	0.118027	0.0986551	-0.0193716	0.010732	0.225321	0.0652909	0.0523302	0.253105	0.0773315	0.0452183
42703	hsa-miR-490-3p	7.13991	-0.243663	-0.1591	0.0845624	-0.337121	-0.150204	-0.197147	-0.120794	0.350787	-0.542478	-0.285868
17822	hsa-miR-490-5p	6.54214	0.323552	0.472684	0.149132	0.460412	0.186691	0.485467	0.492142	0.777155	0.245691	0.362964
147701	hsa-miR-491-3p	12.9022	-1.022	-1.33133	-0.309323	-1.20928	-0.834723	-0.850292	-1.39123	-1.38951	-1.43408	-1.59152
147953	hsa-miR-491-5p	6.29551	-0.0973108	0.0119567	0.109268	-0.117823	-0.0767985	0.141643	0.132573	0.094238	-0.0674187	-0.241252
42661	hsa-miR-492	5.91981	-0.909044	-0.418697	0.490347	-0.977491	-0.840597	-0.661948	-0.513019	-0.502302	0.336963	-0.75318
42847	hsa-miR-497	8.11543	-0.563305	0.0100608	0.573365	-0.517523	-0.609086	0.120603	0.247073	-0.320354	-0.284943	0.287925
42442	hsa-miR-498	7.78172	-0.657832	-0.12146	0.536372	-0.844575	-0.471089	-0.243271	-0.01441	0.231007	-0.162628	-0.418
145692	hsa-miR-499-3p	8.87643	0.519304	-0.175553	-0.694858	0.883189	0.155419	0.949399	0.955653	0.663874	-2.51457	-0.932126
14313	hsa-miR-499-5p	12.1925	0.597448	0.25126	-0.346189	0.626617	0.56828	0.430637	0.429048	-0.220958	-0.0159912	0.633563
17875	hsa-miR-500a	6.1576	0.332414	0.473137	0.140723	0.415447	0.249382	0.455544	0.543209	0.502702	0.577229	0.287003
46406	hsa-miR-500a*	6.22287	0.213954	0.34971	0.135756	0.235676	0.192233	0.347308	0.444238	0.242988	0.496771	0.217246
145675	hsa-miR-501-5p	6.55353	-0.0334595	0.779985	0.813445	-0.0247159	-0.042203	0.673737	0.630421	1.54058	0.544467	0.510724
146178	hsa-miR-502-3p	6.07474	-0.125159	0.027035	0.152194	-0.176193	-0.0741248	0.0769229	0.143604	-0.0117254	0.194654	-0.268281
42490	hsa-miR-505*	6.90637	0.393876	0.660403	0.266527	0.399174	0.388577	0.684919	0.647329	0.836646	0.628673	0.504448
42812	hsa-miR-508-5p	6.14784	-0.195699	0.102248	0.297947	-0.141993	-0.249406	0.0922311	0.0957808	0.356628	0.0334787	-0.066879
42581	hsa-miR-513a-5p	9.12334	-0.499278	0.459457	0.958735	-0.744356	-0.2542	0.491607	0.501701	1.04377	0.309065	-0.0488596
46789	hsa-miR-513b	6.60817	0.704398	1.02869	0.324292	0.764448	0.644347	0.983069	1.08641	1.22304	0.978092	0.872847
11151	hsa-miR-516b	6.51853	-0.0278093	-0.169578	-0.141769	-0.248055	0.192437	-0.224442	-0.187401	0.0941603	-0.150319	-0.37989
148641	hsa-miR-518b	6.26403	0.200512	-0.47615	-0.676662	-0.149923	0.550947	-0.387137	-0.446981	-0.593454	-0.620199	-0.33298
13137	hsa-miR-518e*/hsa-miR-519a*/hsa-miR-519b-5p/hsa-miR-519c-5p/hsa-miR-522*/hsa-miR-523*	6.82267	-0.955104	-0.454476	0.500628	-1.03881	-0.871397	-0.571086	-0.481454	-0.422451	-0.251014	-0.546374
46221	hsa-miR-519d	6.41767	0.175686	0.322459	0.146773	0.299112	0.0522606	0.452575	0.294746	0.346531	0.295507	0.222937
11164	hsa-miR-519e	6.74361	0.108588	0.138968	0.0303805	0.166085	0.0510907	0.213777	0.174136	0.213713	0.0441926	0.049022
13132	hsa-miR-519e*	7.41062	-0.591811	-0.188054	0.403757	-0.573894	-0.609728	-0.373595	-0.155855	0.0422153	-0.0574432	-0.395592
11175	hsa-miR-525-5p	7.37707	-0.410747	-0.275719	0.135028	-0.486206	-0.335288	-0.255937	-0.42333	-0.0975672	-0.169599	-0.432162
42732	hsa-miR-532-3p	5.93786	0.19824	0.185373	-0.0128665	0.20519	0.191289	0.357576	0.200445	-0.0210272	0.22604	0.163831
17624	hsa-miR-532-5p	5.88574	-0.2173	-0.031821	0.185479	-0.140898	-0.293702	-0.058774	0.0564486	-0.116412	0.143751	-0.184118
14272	hsa-miR-542-3p	6.78892	0.319656	0.161495	-0.158161	0.165196	0.474116	0.258617	0.159427	0.0698302	0.101645	0.217958
42811	hsa-miR-542-5p	6.14639	-0.210416	0.0617335	0.27215	-0.258866	-0.161967	0.0517464	0.00660783	0.282813	-0.053282	0.0207825
46705	hsa-miR-548k	5.883	-0.436054	-0.136682	0.299372	-0.396259	-0.475848	-0.117011	-0.202787	0.101511	-0.271274	-0.193849
147584	hsa-miR-548t	5.735	-0.2778	-0.112565	0.165235	-0.349282	-0.206319	-0.175839	-0.156434	0.296736	-0.120611	-0.406678
145789	hsa-miR-550a	6.5481	-0.0831596	0.268551	0.351711	-0.061362	-0.104957	0.287034	0.268307	0.231364	0.50871	0.047341
17272	hsa-miR-551a	6.49876	-0.182953	-0.0824241	0.100529	-0.327552	-0.0383548	0.0829235	-0.162565	0.218867	-0.332443	-0.218903
148644	hsa-miR-551b	5.94384	0.0796033	-0.172026	-0.251629	0.0542004	0.105006	-0.141606	-0.191151	-0.252776	-0.0203811	-0.254213
42781	hsa-miR-551b*	6.30469	-0.514757	-0.119174	0.395583	-0.564557	-0.464957	-0.254161	-0.262941	0.221815	-0.0623469	-0.238236
17668	hsa-miR-552	5.83133	-0.325724	0.255687	0.581412	-0.362415	-0.289033	0.0747559	0.237634	0.844493	0.257271	-0.135717
28966	hsa-miR-574-3p	7.70455	0.320298	-0.077092	-0.39739	0.185549	0.455048	-0.056598	-0.137849	-0.204191	0.0745037	-0.0613254
27740	hsa-miR-574-5p	7.91674	-0.102615	0.0260888	0.128704	-0.270963	0.0657324	0.0635855	-0.188999	0.405214	0.0731437	-0.222501
42446	hsa-miR-576-5p	6.36364	0.358761	0.468285	0.109524	0.444894	0.272628	0.537196	0.51289	0.532089	0.320083	0.439166
145647	hsa-miR-584	6.81287	0.131827	0.344007	0.21218	0.106225	0.157428	0.259109	0.265008	0.3944	0.596354	0.205163
17546	hsa-miR-585	6.82396	-0.699952	0.00279292	0.702745	-0.857563	-0.54234	-0.376194	0.32074	0.0314631	0.263825	-0.225869
42542	hsa-miR-589	6.87321	0.0315639	0.0773178	0.045754	-0.0445199	0.107648	0.0641292	0.0365208	0.0667032	-0.0614978	0.280734
17503	hsa-miR-590-5p	6.43717	0.438849	-0.247517	-0.686366	0.521408	0.35629	-0.141411	-0.113437	-0.863108	-0.221961	0.102333
42504	hsa-miR-593	6.03073	1.08084	1.23235	0.151513	1.05204	1.10964	1.19984	1.31591	1.36177	1.05984	1.2244
42818	hsa-miR-597	6.54384	0.0375502	0.00486215	-0.032688	0.0573497	0.0177506	0.0252563	0.0234148	0.0343674	-0.265579	0.206851
17377	hsa-miR-600	9.14259	0.990598	0.0524834	-0.938115	0.862516	1.11868	0.489098	0.215881	-0.329481	-0.463881	0.350801
17498	hsa-miR-601	6.1289	0.465579	0.452369	-0.0132099	0.482069	0.449089	0.474687	0.50487	0.673937	0.2958	0.312554
145736	hsa-miR-605	6.1693	-0.613663	-0.00863218	0.605031	-0.526347	-0.70098	-0.191555	0.229288	0.0299786	-0.102352	-0.00851962
27672	hsa-miR-615-3p	6.00545	-0.417159	-0.4538	-0.0366411	-0.398023	-0.436295	-0.419722	-0.476769	-0.470186	-0.462805	-0.439519
17336	hsa-miR-618	6.24057	1.01688	1.10046	0.083581	1.06469	0.969079	1.20614	1.20282	1.21715	0.99002	0.886185
148652	hsa-miR-620	6.61458	0.235564	-0.504115	-0.739678	0.0564461	0.414681	-0.461173	-0.561796	-0.407268	-0.693883	-0.396453
145740	hsa-miR-625*	8.10219	-0.544671	-0.590873	-0.0462025	-0.874586	-0.214756	-0.795137	-0.58041	-0.693567	-0.0890107	-0.796243
148684	hsa-miR-628-3p	5.9136	-0.183364	-0.273566	-0.0902023	-0.244782	-0.121945	-0.0877886	-0.215773	-0.32834	-0.443467	-0.292462
17961	hsa-miR-629	6.01738	0.5046	0.695257	0.190657	0.583035	0.426164	0.706991	0.733559	0.789851	0.79022	0.455664
17566	hsa-miR-629*	6.90579	0.16364	0.129545	-0.034095	0.155029	0.17225	0.199131	0.166146	0.160059	-0.00842	0.130805
17327	hsa-miR-630	6.26465	-0.268876	-0.345525	-0.0766495	-0.383525	-0.154227	-0.446715	-0.441639	-0.280538	0.000876282	-0.559612
42591	hsa-miR-634	9.06945	0.0283901	-0.589422	-0.617813	-0.32807	0.38485	-0.304914	-0.664793	-0.330062	-0.909676	-0.737667
42750	hsa-miR-636	5.88503	0.390496	0.303864	-0.0866317	0.477279	0.303713	0.368197	0.271806	0.404735	0.264167	0.210416
42832	hsa-miR-638	8.30494	-0.703062	0.113199	0.816261	-0.816454	-0.58967	-0.06618	0.15885	0.359384	0.101423	0.0125158
148396	hsa-miR-642b	8.16324	-1.76185	-0.602255	1.15959	-1.89284	-1.63086	-1.09582	-0.904012	-0.468496	0.825889	-1.36883
42746	hsa-miR-647	6.5101	0.542334	0.0185777	-0.523757	0.374694	0.709974	0.0680293	0.0495768	0.092946	-0.115393	-0.00227034
17394	hsa-miR-651	6.26312	1.03492	1.12074	0.0858194	1.10988	0.959959	1.32409	1.18	1.17536	1.02408	0.90016
42827	hsa-miR-652	7.86298	0.216269	0.493787	0.277518	0.337572	0.094966	0.666134	0.81375	0.154213	0.246005	0.588834
21498	hsa-miR-654-3p	5.87964	-0.00866605	0.0983713	0.107037	0.0594615	-0.0767936	-0.0263238	0.0105952	0.070082	0.459134	-0.0216306
17460	hsa-miR-657	5.87019	0.0637903	-0.356205	-0.419995	-0.111792	0.239373	-0.0909096	-0.360909	-0.422317	-0.575442	-0.331446
42749	hsa-miR-659	7.5701	-0.334244	-0.0138938	0.320351	-0.291143	-0.377346	-0.361878	-0.325342	0.41755	0.496735	-0.296533
17338	hsa-miR-660	6.23109	0.266684	-0.0399922	-0.306676	0.280499	0.252868	-0.0676832	0.0355002	-0.520602	0.0961341	0.25669
42807	hsa-miR-663	5.97217	-0.106673	0.296217	0.40289	-0.118985	-0.0943604	0.0839366	0.296651	0.196244	0.68265	0.221605
145973	hsa-miR-664	8.16522	0.0505406	0.114234	0.0636934	-0.0371745	0.138256	0.12057	-0.0372282	0.294631	0.118545	0.0746527
46829	hsa-miR-664*	5.9375	0.110271	0.195265	0.0849935	0.105123	0.11542	0.269567	0.249969	0.198404	0.102985	0.155399
145768	hsa-miR-665	7.76641	-1.50935	-0.821062	0.688286	-1.85628	-1.16241	-1.3321	-0.898332	-0.547058	-0.204386	-1.12343
145701	hsa-miR-668	6.78852	0.0479255	-0.226926	-0.274852	0.0395174	0.0563337	-0.0541968	-0.273431	-0.573204	-0.388087	0.154289
42761	hsa-miR-675	7.33983	-1.50144	-0.437891	1.06355	-1.59002	-1.41286	-0.962451	-0.203976	-0.588178	0.375521	-0.810369
42859	hsa-miR-675*	5.93544	0.592092	0.564053	-0.0280389	0.574778	0.609405	0.721537	0.634339	0.58618	0.577322	0.300887
148118	hsa-miR-676*	6.9022	0.00454442	-0.164571	-0.169116	-0.395442	0.404531	0.638629	0.0943101	-0.915931	-0.73475	0.0948844
29490	hsa-miR-7	6.62187	0.315477	0.240559	-0.0749179	0.336196	0.294758	0.160043	0.185279	0.209617	0.435161	0.212697
42964	hsa-miR-7-2*	5.73473	-0.276434	-0.0883707	0.188063	-0.264473	-0.288395	-0.254698	-0.190141	0.279709	-0.150408	-0.126315
29190	hsa-miR-708	6.02063	-0.231395	-0.239963	-0.00856783	-0.146999	-0.315791	-0.220307	-0.27468	-0.513613	-0.0611817	-0.130033
146196	hsa-miR-711	6.26901	-0.733116	-0.358482	0.374634	-0.800307	-0.665926	-0.404422	-0.437427	-0.0798748	-0.122225	-0.748461
146064	hsa-miR-718	6.91561	1.54521	1.72262	0.177412	1.64763	1.4428	1.68647	1.74753	1.73188	1.59654	1.85071
148679	hsa-miR-720	15.0304	-0.141115	-0.0230943	0.118021	-0.063961	-0.218269	-0.0762551	-0.179872	0.125274	0.0986178	-0.0832362
27568	hsa-miR-744	8.56912	0.156141	-0.576479	-0.732621	-0.551273	0.863556	-0.581524	-0.347813	-0.43961	-0.67261	-0.84084
146111	hsa-miR-767-5p	8.10545	0.0886558	0.56838	0.479724	0.145037	0.0322741	0.58629	0.508242	0.890362	0.403953	0.453054
32891	hsa-miR-769-5p	5.84334	0.0179251	0.307632	0.289707	0.030096	0.00575417	0.353374	0.444702	0.54878	0.139731	0.0515738
42808	hsa-miR-874	6.75773	-0.377979	0.20817	0.586149	-0.331586	-0.424372	0.115266	0.213144	0.239154	0.495084	-0.021798
28884	hsa-miR-876-3p	5.66639	0.601153	-0.0356998	-0.636852	0.495668	0.706637	0.139714	-0.512676	0.106518	0.166151	-0.0782054
30033	hsa-miR-877	6.87714	-0.125767	-0.0487909	0.0769764	-0.35649	0.104955	-0.0722755	-0.129646	0.161029	-0.129483	-0.0735782
148622	hsa-miR-877*	8.0216	-0.160269	-0.913851	-0.753582	-0.68547	0.364933	-0.723631	-0.877006	-0.66311	-0.97357	-1.33194
46259	hsa-miR-885-5p	6.44522	1.06248	1.24217	0.179693	1.09412	1.03084	1.33524	1.26251	1.23555	1.21027	1.16731
27961	hsa-miR-891a	6.39445	-0.364557	-0.296818	0.0677391	-0.442718	-0.286397	-0.333073	-0.377618	-0.0894592	-0.482546	-0.201396
148621	hsa-miR-892a	5.99359	0.407154	0.34414	-0.0630131	0.395368	0.418939	0.376764	0.344099	0.322667	0.240485	0.436687
42932	hsa-miR-920	6.58227	-0.106593	-0.139545	-0.0329518	-0.250205	0.0370189	-0.20066	-0.298753	0.113145	-0.249672	-0.0617848
46507	hsa-miR-921	6.14404	0.146214	0.39027	0.244056	0.196061	0.0963659	0.3219	0.390322	0.640468	0.239153	0.359506
145693	hsa-miR-92a	8.77337	-0.238739	0.0811962	0.319936	-0.117058	-0.360421	0.0497233	0.201419	-0.25128	0.310837	0.0952825
145897	hsa-miR-92b	6.5874	-0.502476	-0.234209	0.268267	-0.393936	-0.611016	-0.263806	-0.186861	-0.530631	0.0127506	-0.202497
30687	hsa-miR-93	8.24542	-0.348632	0.161806	0.510438	-0.252327	-0.444937	0.0489563	0.31567	-0.0591235	0.322123	0.181406
17863	hsa-miR-934	6.2925	0.0121602	-0.221917	-0.234078	-0.122138	0.146458	-0.14522	-0.256799	-0.0513776	-0.302773	-0.353417
42514	hsa-miR-937	7.68823	0.334185	0.321503	-0.0126823	0.185617	0.482753	0.610795	0.314189	0.539403	-0.360879	0.504006
146115	hsa-miR-940	6.01678	0.370866	0.393213	0.0223466	0.427927	0.313805	0.331419	0.378076	0.505456	0.403992	0.347119
42696	hsa-miR-943	7.82051	-0.475401	-0.124478	0.350924	-0.629987	-0.320815	-0.422703	0.0835192	-0.160955	-0.281789	0.15954
13147	hsa-miR-96	6.01946	0.242994	0.355601	0.112608	0.29471	0.191278	0.346379	0.508858	0.356492	0.131103	0.435175
11182	hsa-miR-98	9.53623	-0.037889	-0.444846	-0.406957	-0.00507413	-0.0707038	-0.193598	-0.224116	-1.0903	-0.555935	-0.16028
42708	hsa-miR-99a	9.84352	-0.119812	-0.313828	-0.194016	0.00394882	-0.243573	-0.200193	-0.140808	-0.776167	-0.289788	-0.162184
145651	hsa-miR-99a*	6.09618	0.0790635	-0.233216	-0.312279	0.143835	0.014292	-0.0530852	-0.205464	-0.545207	-0.243168	-0.119154
11184	hsa-miR-99b	8.80923	0.0541607	0.131051	0.0768899	0.139141	-0.0308195	0.313581	0.294965	-0.0130107	0.0364598	0.0232582
17898	hsa-miR-99b*	7.43793	0.0862918	0.608262	0.521971	0.130741	0.0418431	0.508785	0.519891	1.20121	0.461973	0.349448
28302	hsa-miRPlus-A1015	10.0225	-0.0370548	0.593926	0.630981	0.0393364	-0.113446	0.563237	0.569314	0.858771	0.889675	0.088634
42780	hsa-miRPlus-A1065	6.79335	-0.391809	-0.114386	0.277422	-0.53828	-0.245338	0.104612	-0.0857873	-0.0918483	-0.0468608	-0.452047
42793	hsa-miRPlus-A1072	7.72083	-0.487379	-0.153726	0.333654	-0.644261	-0.330497	-0.257221	-0.363493	0.260217	0.0260398	-0.434171
17858	hsa-miRPlus-A1073	6.95688	1.4986	1.52964	0.0310399	1.5284	1.4688	1.56907	1.60585	1.57395	1.46998	1.42936
145956	hsa-miRPlus-A1083	6.92425	0.343689	0.924675	0.580986	0.351646	0.335733	0.872911	0.954936	0.922179	1.06619	0.807156
17885	hsa-miRPlus-A1086	7.07054	-1.03846	-1.38689	-0.348429	-1.45627	-0.620653	-0.517011	-1.83988	-1.62098	-1.87581	-1.08078
17848	hsa-miRPlus-A1087	7.85487	-0.753197	-0.318227	0.43497	-1.23027	-0.276128	0.203577	-0.475047	-0.899568	-0.576319	0.156222
17653	hsa-miRPlus-C1049	9.67316	0.990471	0.975399	-0.0150727	0.793236	1.18771	1.03497	0.954671	1.04347	0.734089	1.1098
42838	hsa-miRPlus-C1076	6.12098	-0.0882357	0.144258	0.232494	-0.0646738	-0.111798	0.0517671	0.0989937	0.0330253	0.262728	0.274777
17841	hsa-miRPlus-C1100	5.92685	0.408628	0.462585	0.0539571	0.406591	0.410666	0.49269	0.451326	0.299336	0.678792	0.390783
17955	hsa-miRPlus-C1110	7.21268	-0.599648	-0.150727	0.448921	-0.480379	-0.718917	-0.322485	0.053914	-0.10054	-0.174493	-0.21003
145933	hsa-miRPlus-C1115	6.60771	-0.424342	0.581683	1.00602	-0.439568	-0.409116	0.410564	0.480159	1.58367	0.456099	-0.0220742
146166	hsa-miRPlus-G1065-5p	5.83217	-0.0411919	-0.28755	-0.246358	-0.411935	0.329551	-0.164325	-0.210102	-0.157363	-0.61841
146113	hsa-miRPlus-G1246-3p	6.61391	-0.204935	-0.0594479	0.145487	-0.203626	-0.206244	-0.11956	-0.107294	-0.0616831	0.296288	-0.30499
147536	hsa-miRPlus-I107*	5.93132	0.159544	-0.0161783	-0.175723	0.100013	0.219075	0.135648	0.0598994	-0.181619	-0.138246	0.0434257
148504	hsa-miRPlus-I874*	6.5467	0.153991	0.259857	0.105866	0.147804	0.160177	0.265425	0.327959	0.196634	0.24668	0.262587
147975	hsa-miRPlus-J1003	6.11967	0.302695	0.127371	-0.175323	0.224623	0.380766	0.244245	0.135157	0.206432	-0.0211027	0.0721248
147415	hsa-miRPlus-J1011	6.34258	-0.428775	-0.536173	-0.107398	-0.642407	-0.215143	-0.355181	-0.602964	-0.37884	-0.678556	-0.665323
147280	hsa-miRPlus-J1185-1*	6.60267	1.233	1.32067	0.0876675	1.21133	1.25468	1.28433	1.4162	1.3632	1.32412	1.21551
42502	hsa-miRPlus-J204*	8.29232	-0.395601	-0.0999136	0.295687	-0.542238	-0.248964	-0.216458	-0.0918222	0.171335	0.0988532	-0.461475
147576	hsv1-miR-H1*	6.00174	0.691326	0.708514	0.0171876	0.756883	0.625769	0.78231	0.742058	0.773277	0.692622	0.552301
147889	hsv1-miR-H14-3p	5.94256	-0.142928	0.0521866	0.195115	-0.154478	-0.131378	-0.0945135	-0.0531115	0.148117	0.389902	-0.129461
147804	hsv1-miR-H17	6.47026	-0.33145	-0.320042	0.0114079	-0.728194	0.0652938	-0.476007	-0.0353287	-0.317214	-0.27223	-0.49943
146058	hsv1-miR-H3	6.12482	1.25798	1.33083	0.0728494	1.34791	1.16806	1.3386	1.38264	1.44533	1.2094	1.27819
146159	hsv1-miR-H4*	8.37526	-0.400319	-0.411851	-0.0115328	-0.379383	-0.421254	-0.236948	-0.493067	-0.414032	-0.557601	-0.357609
146098	hsv1-miR-H5-3p	6.94903	0.787031	-0.515611	-1.30264	0.580114	0.993948	0.000542961	-0.38157	-0.813096	-0.969522	-0.414409
146117	hsv1-miR-H6-3p	10.2075	-0.632	-0.828926	-0.196925	-1.21103	-0.0529672	-1.03147	-0.453058	-0.764775	-0.880239	-1.01509
146090	hsv1-miR-H7*	8.79951	-2.64888	-1.06128	1.5876	-2.8752	-2.42256	-1.57513	-0.528287	-0.961222	-0.714781	-1.52696
146042	hsv1-miR-H8*	7.48999	0.709934	0.78977	0.0798351	0.703697	0.716172	0.694047	0.631453	0.929955	0.942794	0.750599
147803	hsv2-miR-H10	8.51625	-1.48929	-0.189951	1.29934	-1.62424	-1.35435	-0.543226	0.0807237	0.215539	-0.0950258	-0.607767
147738	hsv2-miR-H20	7.11729	0.431177	-0.0126979	-0.443875	0.2852	0.577154	0.166053	0.0579821	-0.192223	-0.334613	0.239311
147864	hsv2-miR-H24	6.71554	0.682295	0.584501	-0.0977944	0.725351	0.639239	0.58007	0.485583	0.701037	0.623253	0.53256
147884	hsv2-miR-H25	8.26311	-1.60288	-0.636567	0.966315	-1.73573	-1.47004	-0.863983	-0.310079	-0.477018	-0.734709	-0.797046
147900	hsv2-miR-H6*	7.91431	-0.533195	-0.82143	-0.288235	-0.686676	-0.379715	-0.655731	-0.895361	-0.509251	-1.04837	-0.998437
147790	hsv2-miR-H7-3p	8.33566	-2.30556	-0.988101	1.31746	-2.49789	-2.11323	-1.3865	-0.570349	-0.754768	-0.794664	-1.43422
147836	hsv2-miR-H7-5p	5.90354	-0.0821573	0.226479	0.308636	-0.0988201	-0.0654945	0.0587206	0.25085	0.361717	0.161958	0.299151
147840	hsv2-miR-H9-3p	6.25424	-0.523211	-0.48388	0.0393314	-0.596884	-0.449539	-0.471443	-0.639447	-0.424681	-0.492228	-0.391601
42656	kshv-miR-K12-10a	7.05903	1.54076	1.62595	0.0851927	1.63272	1.44881	1.70749	1.56971	1.7162	1.48324	1.65314
42624	kshv-miR-K12-10b	6.76387	1.50349	1.56577	0.0622782	1.57103	1.43595	1.52796	1.52162	1.69845	1.47674	1.60406
147919	kshv-miR-K12-12	6.18687	-0.606271	-0.00528924	0.600982	-0.646144	-0.566397	-0.153142	0.00833491	0.0728794	0.118008	-0.0725261
42795	kshv-miR-K12-3	7.27228	-0.804528	-0.196367	0.608161	-0.997404	-0.611653	-0.31556	-0.0134594	-0.117765	-0.285477	-0.249574
147885	kshv-miR-K12-5*	8.21844	-0.37	-0.185941	0.184059	-0.378593	-0.361406	-0.0168221	-0.333388	0.0564786	-0.241098	-0.394875
17488	kshv-miR-K12-6-3p	8.66194	0.00580572	-0.872614	-0.87842	-0.904701	0.916312	-1.02957	-0.826841	-0.565175	-0.932883	-1.0086
19011	SNORD10	8.7987	-0.122451	-0.0964674	0.0259837	0.0282082	-0.27311	0.0600864	-0.135502	-0.881743	0.661499	-0.186677
19005	SNORD118	8.17447	-0.563565	-0.0817683	0.481797	-0.591124	-0.536006	0.0141247	-0.549117	0.165408	0.46581	-0.505067
19606	SNORD12	6.41315	0.0763017	0.00699816	-0.0693036	0.241089	-0.0884852	0.114224	-0.00622153	-0.154433	0.024056	0.0573655
19603	SNORD13	8.37694	0.275063	-0.208284	-0.483348	0.380097	0.17003	-0.0239562	0.00505025	-1.0246	0.24927	-0.247183
19013	SNORD14B	6.31801	0.121403	-0.140346	-0.261749	0.284951	-0.0421446	-0.107295	-0.106987	-0.40479	-0.0894874	0.00683023
19008	SNORD2	9.55127	-0.0354956	0.0392911	0.0747868	0.1073	-0.178292	0.0869825	-0.00525875	-0.368781	0.655742	-0.17223
19007	SNORD3@	10.1	-0.432223	-0.228109	0.204114	-0.53746	-0.326986	-0.514177	-0.638449	-0.211287	0.776923	-0.553555
46204	SNORD38B	8.51576	-0.0182394	-0.291933	-0.273694	0.15241	-0.188889	-0.0774102	-0.241646	-1.0765	0.194499	-0.258613
46206	SNORD44	7.6984	-0.123482	-0.762387	-0.638905	0.169289	-0.416254	-0.712161	-0.920332	-1.4842	-0.108814	-0.586431
46205	SNORD48	8.74571	-0.0610547	-0.0329205	0.0281342	0.0844751	-0.206584	0.0855725	-0.172462	-0.412735	0.4335	-0.0984774
46203	SNORD49A	7.19125	-0.0967898	-0.646898	-0.550108	0.0188607	-0.21244	-0.496777	-0.676256	-1.47101	-0.0936529	-0.496798
19604	SNORD4A	8.86087	-0.176995	0.30019	0.477186	-0.0629794	-0.291011	0.382606	0.28562	0.236105	0.50482	0.0917999
19605	SNORD6	9.31998	-0.179688	0.525866	0.705553	-0.0715502	-0.287826	0.508908	0.412594	0.581718	0.941847	0.18426
145663	SNORD65	10.8355	-0.395879	0.138917	0.534797	-0.323691	-0.468067	0.24993	0.114848	-0.122799	0.571302	-0.118694
145666	SNORD68	7.35779	0.202352	0.0755048	-0.126847	0.26102	0.143683	0.160772	-0.0180008	-0.143613	0.260677	0.11769
17492	sv40-miR-S1-5p	8.99702	-2.15006	-0.757215	1.39285	-2.28763	-2.0125	-1.54539	-0.828904	-1.06932	0.406061	-0.748515

## Sheet: Table C
Supplemental file 4. Table C. Q-PCR array analysis of miR expression in tissue in pf-LVAD supported patients (post vs control)
			Avg	Avg
ProbeID	Annotation	AvgHy3	Control	post-LVAD	logFC	control 2	control 3	patient 1 post	patient 2 post	patient 3 post	patient 4 post	patient 5 post	patient 6 post
17415	ebv-miR-BART10	6.958	0.459	0.215	-0.244	0.482	0.436	0.351	-0.06	0.276	-0.124	0.313	0.535
27537	ebv-miR-BART13	7.407	-0.136	0.324	0.46	-0.152	-0.121	0.135	0.483	0.188	0.807	0.136	0.194
17358	ebv-miR-BART16	6.929	0.279	0.232	-0.048	0.258	0.301	0.091	0.336	0.343	0.355	0.127	0.137
42522	ebv-miR-BART19-3p	9.878	-0.329	1.935	2.264	-0.482	-0.176	0.711	3.4	1.642	3.106	1.724	1.029
17532	ebv-miR-BART5	6.375	-0.619	-0.402	0.218	-0.568	-0.671	-0.618	0.34	-0.606	-0.194	-0.738	-0.595
17561	ebv-miR-BART6-3p	8.06	-1.12	0.735	1.855	-1.344	-0.896	-0.337	2.165	0.217	2.131	0.423	-0.186
17328	ebv-miR-BART8*	7.973	-1.869	-0.856	1.013	-1.953	-1.786	-1.598	0.443	-1.449	-0.813	-0.453	-1.264
42906	ebv-miR-BHRF1-1	6.426	-0.587	-0.304	0.284	-0.65	-0.525	-0.242	-0.192	-0.398	-0.247	-0.333	-0.41
42951	ebv-miR-BHRF1-2	8.253	-0.613	-0.193	0.42	-0.657	-0.57	-0.533	0.315	-0.511	0.246	-0.345	-0.331
42782	hcmv-miR-UL148D	7.731	0.131	-0.655	-0.786	-0.413	0.675	-0.796	-0.424	-1.067	-0.478	-0.545	-0.62
147162	hsa-let-7a	10.545	-0.033	-0.761	-0.729	0.042	-0.108	-0.024	-1.791	-0.394	-1.623	-0.498	-0.238
42530	hsa-let-7a-2*	6.374	-0.331	-0.27	0.062	-0.34	-0.323	-0.301	-0.258	-0.272	-0.267	-0.327	-0.194
17888	hsa-let-7a*	6.175	0.226	0.023	-0.203	0.301	0.151	0.34	-0.275	0.049	-0.152	0.032	0.146
147165	hsa-let-7b	11.843	-0.301	0.338	0.639	-0.292	-0.309	0.156	0.338	0.201	0.543	0.427	0.365
42769	hsa-let-7b*	6.644	-0.302	-0.088	0.214	-0.29	-0.314	0.032	-0.232	-0.212	-0.01	-0.078	-0.027
145820	hsa-let-7c	11.152	-0.375	0.177	0.552	-0.338	-0.413	0.146	0.114	0.083	0.237	0.273	0.207
145968	hsa-let-7d	9.897	-0.063	-0.324	-0.261	-0.004	-0.122	0.033	-0.999	-0.043	-0.716	-0.252	0.035
145633	hsa-let-7d*	7.473	-0.473	0.091	0.565	-0.537	-0.409	-0.202	0.51	-0.05	0.252	0.151	-0.112
145846	hsa-let-7e	9.593	-0.065	-0.437	-0.372	-0.082	-0.048	-0.163	-0.707	-0.289	-0.66	-0.56	-0.242
145840	hsa-let-7f-1*	6.835	-0.22	-0.014	0.206	-0.273	-0.167	0.105	-0.093	-0.024	-0.099	0.021	0.009
46438	hsa-let-7g	10.614	0.027	-0.484	-0.511	0.119	-0.065	0.115	-1.229	-0.226	-1.083	-0.335	-0.145
9938	hsa-let-7i	10.446	-0.302	0.018	0.32	-0.302	-0.303	-0.024	-0.245	-0.008	-0.033	0.233	0.184
145746	hsa-let-7i*	6.147	-0.131	-0.32	-0.189	-0.131	-0.13	0.001	-0.814	-0.255	-0.622	-0.085	-0.146
10916	hsa-miR-1	12.036	1.085	-1.021	-2.106	1.031	1.14	0.071	-2.408	-0.467	-2.177	-0.56	-0.584
145943	hsa-miR-100	8.767	-0.495	-0.349	0.146	-0.456	-0.534	-0.045	-0.785	-0.671	-0.223	-0.369	0
31026	hsa-miR-101	11.185	0.007	-0.09	-0.097	0.053	-0.039	0.183	-0.742	0.248	-0.585	0.186	0.17
17935	hsa-miR-101*	6.13	0.148	0.172	0.023	0.18	0.116	0.446	-0.166	0.414	-0.179	0.205	0.309
10919	hsa-miR-103a	9.492	0.037	-0.105	-0.142	0.019	0.056	0.125	-0.49	-0.043	-0.203	-0.156	0.139
146223	hsa-miR-103a-2*	6.055	-0.124	-0.089	0.035	-0.161	-0.087	-0.033	-0.029	-0.089	-0.063	-0.185	-0.136
46801	hsa-miR-106a	7.405	-0.536	-0.722	-0.186	-0.41	-0.661	-0.334	-1.276	-0.665	-1.141	-0.477	-0.44
19582	hsa-miR-106b	8.873	-0.297	-0.028	0.269	-0.232	-0.361	0.024	-0.178	0.078	-0.066	-0.106	0.082
17854	hsa-miR-106b*	6.755	-0.519	0.113	0.632	-0.614	-0.424	-0.115	0.501	-0.093	0.363	0.054	-0.035
10923	hsa-miR-107	8.65	0.005	-0.218	-0.223	-0.053	0.063	0.023	-0.675	-0.079	-0.413	-0.261	0.096
13485	hsa-miR-10a	6.868	0.191	-0.208	-0.399	-0.226	0.608	0.977	-1.089	-0.394	-0.965	0.075	0.149
10925	hsa-miR-10b	6.549	0.194	-0.324	-0.517	-0.239	0.626	1.141	-1.262	-0.639	-1.096	-0.008	-0.077
46258	hsa-miR-1184	7.222	-0.563	0.032	0.595	-0.694	-0.431	-0.164	0.166	-0.165	0.308	0.037	0.011
46345	hsa-miR-1207-3p	6.462	1.016	1.185	0.17	1.102	0.929	1.094	1.145	1.257	1.215	1.16	1.241
46806	hsa-miR-1227	6.076	0.543	0.578	0.035	0.6	0.487	0.473	0.566	0.667	0.597	0.579	0.586
46222	hsa-miR-1228*	6.27	0.61	1.107	0.498	0.598	0.622	1.014	1.182	1.191	1.178	0.98	1.099
46624	hsa-miR-1236	6.947	0.121	0.209	0.088	-0.048	0.29	-0.155	0.493	0.017	0.593	0.167	0.138
42898	hsa-miR-124*	6.273	-0.731	-0.077	0.654	-0.721	-0.741	-0.373	0.288	-0.162	-0.019	-0.197	0
46404	hsa-miR-1244	6.044	0.852	0.961	0.109	0.924	0.779	1.041	1.026	0.959	0.93	0.948	0.858
148642	hsa-miR-1246	11.505	-2.079	-0.6	1.478	-1.74	-2.418	-1.634	0.484	-1.083	0.684	-0.556	-1.498
145977	hsa-miR-1247	6.564	-0.025	0.08	0.106	-0.029	-0.022	-0.01	-0.067	0.096	0.177	0.056	0.232
46427	hsa-miR-1248	6.366	-0.31	-0.623	-0.313	-0.25	-0.369	-0.332	-0.82	-0.475	-0.722	-0.758	-0.627
46210	hsa-miR-1249	7.214	1.777	1.918	0.141	1.806	1.747	1.929	1.922	1.935	1.879	1.814	2.029
46214	hsa-miR-1250	6.133	1.114	1.186	0.072	1.083	1.145	1.144	1.254	1.238	1.161	1.148	1.172
46380	hsa-miR-1255a	7.707	0.151	-0.281	-0.431	-0.174	0.476	-0.526	0.025	-0.192	0.033	-0.464	-0.56
17942	hsa-miR-125a-3p	6.551	0.609	0.861	0.252	0.664	0.554	0.868	0.937	0.935	0.871	0.76	0.794
10928	hsa-miR-125a-5p	10.921	-0.119	0.013	0.133	-0.129	-0.11	0.325	-0.404	0.22	-0.189	-0.009	0.136
30787	hsa-miR-125b	12.94	-0.435	-0.091	0.345	-0.374	-0.497	0.051	-0.146	-0.176	-0.014	-0.154	-0.104
145838	hsa-miR-125b-1*	6.115	-0.075	0.226	0.302	-0.122	-0.028	0.102	0.573	0.052	0.171	0.334	0.125
42845	hsa-miR-125b-2*	6.064	0.039	-0.617	-0.657	-0.397	0.475	-0.416	-0.643	-0.649	-0.723	-0.677	-0.597
4610	hsa-miR-126	11.911	0.596	-0.551	-1.147	0.667	0.525	0.432	-1.663	-0.148	-1.656	-0.263	-0.009
33596	hsa-miR-126*	9.679	0.594	-0.742	-1.336	0.634	0.555	0.296	-1.93	-0.38	-1.727	-0.459	-0.25
145975	hsa-miR-1260	14.911	-0.132	-0.229	-0.097	-0.127	-0.137	-0.128	-0.111	-0.316	-0.248	-0.201	-0.37
147791	hsa-miR-1260b	15.334	-0.309	0.088	0.398	-0.303	-0.316	-0.317	0.239	0.376	0.155	0.009	0.068
46732	hsa-miR-1264	10.588	0.323	0.521	0.198	0.382	0.264	0.474	0.464	0.768	0.469	0.332	0.619
46737	hsa-miR-1265	7.027	0.156	0.08	-0.075	0.209	0.102	0.247	0	0.241	-0.025	-0.117	0.135
46558	hsa-miR-1268/hsa-miR-1268b	5.853	0.761	0.925	0.163	0.839	0.684	1.193	0.799	1.156	0.538	0.731	1.132
42829	hsa-miR-127-3p	6.322	-0.398	0.191	0.588	-0.371	-0.424	-0.016	0.162	0.024	0.571	0.291	0.114
46752	hsa-miR-1270	5.995	0.305	0.547	0.242	0.244	0.365	0.43	0.695	0.72	0.63	0.427	0.379
46627	hsa-miR-1271	6.008	0.247	0.261	0.014	0.234	0.26	0.434	0.126	0.371	0.017	0.116	0.504
148263	hsa-miR-1273e	6.837	-0.501	-0.608	-0.106	-0.643	-0.36	-0.93	-0.218	-0.788	-0.176	-0.574	-0.961
46620	hsa-miR-1275	12.303	-2.141	0.649	2.79	-2.294	-1.988	-1.06	2.423	0.185	2.262	0.646	-0.561
33902	hsa-miR-128	6.253	0.26	0.163	-0.096	0.335	0.184	0.453	-0.045	0.285	-0.069	0.13	0.227
148675	hsa-miR-1280	15.03	-0.041	0.014	0.056	0.012	-0.094	-0.018	0.172	0.056	0.18	-0.115	-0.189
46634	hsa-miR-1281	6.315	0.726	0.854	0.128	0.806	0.646	0.755	0.902	0.862	0.908	0.795	0.904
46336	hsa-miR-1284	6.634	-0.06	-0.063	-0.003	-0.076	-0.044	-0.057	-0.024	-0.071	-0.066	-0.05	-0.111
145981	hsa-miR-1285	6.572	-0.192	-0.517	-0.324	-0.238	-0.147	-0.572	-0.492	-0.529	-0.331	-0.6	-0.576
42571	hsa-miR-129*	8.106	1.046	-0.288	-1.335	0.935	1.158	0.584	-1.289	-0.027	-1.255	-0.144	0.403
46921	hsa-miR-1290	10.97	-2.605	-0.623	1.982	-2.351	-2.86	-1.768	0.506	-1.109	0.712	-0.6	-1.482
46416	hsa-miR-1293	6.04	0.928	0.744	-0.184	0.852	1.004	0.636	0.611	0.981	0.671	0.934	0.628
46944	hsa-miR-1297	7.653	0.418	-0.867	-1.284	0.586	0.249	0.185	-1.816	-0.663	-1.607	-0.825	-0.474
46381	hsa-miR-1298	6.485	-0.558	-0.133	0.425	-0.476	-0.64	-0.555	0.717	-0.539	0.39	-0.505	-0.309
46788	hsa-miR-1299	6.787	0.072	-0.101	-0.173	0.009	0.135	-0.233	0.082	-0.109	0.103	-0.24	-0.211
46215	hsa-miR-1301	6.309	0.346	0.612	0.266	0.39	0.301	0.576	0.65	0.584	0.69	0.587	0.583
46479	hsa-miR-1304	6.733	-0.657	-0.495	0.162	-0.813	-0.501	-0.82	-0.242	-0.539	-0.139	-0.542	-0.686
42681	hsa-miR-1307	6.898	0.249	0.542	0.293	0.33	0.168	0.592	0.716	0.481	0.517	0.423	0.525
10138	hsa-miR-130a	10.023	0.078	0.178	0.1	0.223	-0.066	0.284	-0.456	0.477	-0.095	0.515	0.343
10936	hsa-miR-130b	7.082	0.113	0.566	0.454	0.179	0.046	0.407	0.66	0.39	0.863	0.497	0.58
46866	hsa-miR-1321	7.362	0.269	-0.193	-0.462	0.071	0.467	-0.363	-0.012	-0.234	-0.087	-0.226	-0.238
146137	hsa-miR-133a	13.274	0.535	0.255	-0.281	0.345	0.725	0.302	-0.204	0.749	-0.358	0.668	0.372
146160	hsa-miR-133b	13.762	0.522	0.21	-0.312	0.334	0.711	0.303	-0.221	0.699	-0.374	0.603	0.251
42839	hsa-miR-135a	6.918	0.25	-0.581	-0.831	0.23	0.271	-1.034	-0.959	-0.126	-1.064	-0.1	-0.202
10943	hsa-miR-136	8.328	-0.205	0.321	0.527	-0.174	-0.236	0.087	-0.086	0.227	0.728	0.676	0.296
42512	hsa-miR-136*	6.107	-0.296	-0.249	0.047	-0.312	-0.279	-0.075	-0.671	-0.288	-0.368	0.062	-0.155
42872	hsa-miR-138-1*	9.165	0.707	-0.226	-0.933	0.523	0.891	0.226	-0.881	-0.1	-0.764	-0.082	0.247
145677	hsa-miR-139-5p	7.695	0.214	0.291	0.077	0.238	0.19	0.541	-0.296	0.641	-0.009	0.507	0.361
42630	hsa-miR-140-3p	9.158	-0.181	0.422	0.603	-0.233	-0.129	0.422	0.299	0.213	0.622	0.513	0.461
4700	hsa-miR-140-5p	7.487	-0.045	-0.375	-0.33	-0.118	0.027	0.416	-1.429	-0.343	-0.844	-0.087	0.036
145798	hsa-miR-142-5p	7.393	-1.668	-0.604	1.063	-1.439	-1.897	-1.095	-0.824	-1.298	0.32	0.06	-0.788
13177	hsa-miR-143	12.278	0.022	-0.405	-0.428	0.064	-0.019	-0.103	-1.175	-0.179	-0.615	-0.344	-0.015
46467	hsa-miR-143*	7.611	-0.134	0.244	0.378	-0.119	-0.149	0.131	0.15	0.157	0.514	0.211	0.3
29802	hsa-miR-144	9.586	-5.092	-2.474	2.618	-4.684	-5.501	-3.27	-1.312	-2.471	-2.653	-2.683	-2.456
42641	hsa-miR-145	10.677	-0.168	0.011	0.179	-0.218	-0.118	0.085	-0.443	0.072	0.095	0.072	0.186
31867	hsa-miR-145*	6.626	-0.26	-0.533	-0.273	-0.338	-0.182	-0.027	-1.141	-0.567	-0.723	-0.493	-0.249
146072	hsa-miR-1469	8.93	-1.032	-0.311	0.722	-1.586	-0.478	-1.24	0.676	-1.205	0.786	-0.147	-0.733
10952	hsa-miR-146a	6.855	0.052	0.089	0.037	0.136	-0.031	0.391	-0.154	-0.438	0.347	0.429	-0.039
42461	hsa-miR-146b-3p	6.441	-0.571	-0.766	-0.195	-0.788	-0.354	-0.955	-0.479	-0.971	-0.297	-0.793	-1.098
10306	hsa-miR-146b-5p	7.444	-0.024	-0.133	-0.109	0.283	-0.331	-0.08	-0.501	-0.592	0.525	0.079	-0.226
10955	hsa-miR-148a	6.644	0.089	-0.384	-0.472	-0.076	0.253	0.181	-1.046	-0.493	-0.644	-0.298	0
19585	hsa-miR-148b	8.054	0.199	0.302	0.102	0.227	0.171	0.488	-0.024	0.3	0.378	0.334	0.334
42810	hsa-miR-149	6.383	0.227	0.326	0.1	0.285	0.168	0.402	0.254	0.365	0.363	0.098	0.476
42486	hsa-miR-149*	8.89	-0.897	-0.112	0.785	-1.05	-0.744	-0.709	0.553	-0.424	0.407	-0.045	-0.454
145678	hsa-miR-150	8.115	-0.313	-0.208	0.106	-0.619	-0.007	-0.238	-0.515	-0.041	-0.376	0.054	-0.128
17463	hsa-miR-151-3p	7.942	0.153	0.768	0.616	0.187	0.118	0.727	0.919	0.698	0.855	0.688	0.723
11260	hsa-miR-151-5p	8.093	0.296	-0.216	-0.512	0.379	0.213	0.272	-0.934	0.043	-0.694	-0.142	0.16
17676	hsa-miR-152	8.52	0.314	0.511	0.197	0.373	0.255	0.538	0.363	0.362	0.597	0.717	0.489
145857	hsa-miR-154	5.82	-0.243	-0.11	0.133	-0.241	-0.246	-0.137	-0.191	-0.294	0.013	0.069	-0.121
10964	hsa-miR-155	7.884	-0.137	1.147	1.284	-0.1	-0.175	0.466	2.032	0.75	2.054	1.035	0.544
27720	hsa-miR-15a	9.721	-0.093	-0.369	-0.277	-0.058	-0.128	0.326	-1.388	0.015	-0.892	-0.36	0.083
17280	hsa-miR-15b	8.247	-0.364	-0.867	-0.502	-0.222	-0.507	-0.339	-1.712	-0.465	-1.415	-0.792	-0.476
10967	hsa-miR-16	10.007	-0.378	-1.282	-0.904	-0.268	-0.488	-0.296	-2.679	-0.717	-2.234	-1.071	-0.696
46777	hsa-miR-17	8.311	-0.403	-0.517	-0.114	-0.27	-0.537	-0.274	-0.912	-0.431	-0.838	-0.346	-0.301
19588	hsa-miR-17*	6.594	-0.109	0.066	0.175	-0.074	-0.144	0.144	-0.206	0.113	-0.033	0.211	0.171
42865	hsa-miR-181a	9.715	-0.015	0.697	0.712	-0.014	-0.015	0.423	1.016	0.697	0.805	0.583	0.66
17928	hsa-miR-181a-2*	6.252	0.065	0.116	0.052	0.116	0.014	0.308	0.161	0.116	0.013	-0.029	0.129
10972	hsa-miR-181b	7.707	0.28	0.57	0.291	0.338	0.221	0.414	0.74	0.506	0.538	0.5	0.723
145636	hsa-miR-181d	7.558	-0.054	0.093	0.147	-0.027	-0.081	0.267	0.06	0.033	-0.102	-0.05	0.349
46810	hsa-miR-1827	9.29	0.064	-0.52	-0.584	0.003	0.125	-0.431	-0.569	-0.517	-0.375	-0.604	-0.623
17953	hsa-miR-183*	6.361	-0.567	-0.276	0.291	-0.627	-0.507	-0.501	0.009	-0.438	-0.219	-0.201	-0.305
42902	hsa-miR-185	8.524	-0.035	-0.011	0.024	-0.143	0.074	-0.129	0.12	-0.144	0.06	0.027	-0.001
18739	hsa-miR-186	8.127	0.028	0.357	0.328	0.027	0.029	0.42	0.23	0.406	0.408	0.193	0.483
42614	hsa-miR-186*	6.007	0.368	0.366	-0.002	0.234	0.503	0.424	0.291	0.333	0.403	0.429	0.316
145670	hsa-miR-18b	6.184	-0.337	-0.473	-0.135	-0.263	-0.412	-0.341	-0.738	-0.449	-0.591	-0.348	-0.37
27536	hsa-miR-190	7.338	0.613	-0.404	-1.017	0.851	0.375	0.399	-1.355	-0.157	-1.132	-0.154	-0.025
148687	hsa-miR-1908	9.671	-1.445	-0.532	0.913	-1.72	-1.169	-1.366	0.451	-1.206	0.164	-0.379	-0.853
146180	hsa-miR-1909	6.474	-0.85	-0.043	0.807	-1.045	-0.655	-0.712	0.61	-0.55	0.887	-0.008	-0.486
10985	hsa-miR-191	8.885	-0.168	0.079	0.248	-0.241	-0.096	0.298	-0.17	0.06	0.006	0.299	-0.019
146103	hsa-miR-1913	7.026	0.737	0.677	-0.06	0.803	0.671	0.745	0.466	0.772	0.541	0.695	0.842
146091	hsa-miR-1914	5.79	-0.499	-0.31	0.189	-0.488	-0.511	-0.544	-0.348	-0.378	-0.037	-0.229	-0.326
146068	hsa-miR-1915	6.144	-0.053	0.082	0.135	-0.068	-0.038	-0.081	0.197	0.059	0.017	0.338	-0.036
10986	hsa-miR-193a-3p	9.151	-0.548	-0.433	0.115	-0.427	-0.67	-0.512	-1.267	-0.303	-0.183	-0.17	-0.162
46443	hsa-miR-193a-5p	7.352	0.047	0.455	0.407	0.173	-0.078	0.29	0.262	0.332	0.85	0.623	0.372
10987	hsa-miR-193b	8.361	-0.316	0.195	0.512	-0.264	-0.369	0.001	-0.042	0.022	0.344	0.538	0.311
42962	hsa-miR-193b*	6.482	-0.564	-0.112	0.452	-0.592	-0.535	-0.198	0.028	-0.421	0.131	-0.001	-0.208
13148	hsa-miR-195	9.837	-0.284	-0.47	-0.186	-0.16	-0.408	0.002	-1.369	-0.524	-0.848	-0.488	0.408
42723	hsa-miR-195*	5.995	-0.373	-0.177	0.196	-0.421	-0.326	-0.268	-0.038	-0.292	0.055	-0.328	-0.19
42538	hsa-miR-196a*	7.493	0.072	0.222	0.15	0.089	0.055	0.272	0.161	0.084	0.396	0.312	0.107
145889	hsa-miR-196b	6.055	0.987	1.149	0.162	1.025	0.95	1.086	1.093	1.241	1.168	1.213	1.096
42783	hsa-miR-197	7.9	0.048	0.199	0.151	0.13	-0.033	0.467	-0.043	0.261	0.033	0.196	0.282
146165	hsa-miR-1973	10.535	-0.056	1.309	1.365	-0.383	0.272	0.735	2.578	1.133	1.862	1.12	0.427
146140	hsa-miR-1976	6.543	0.05	-0.002	-0.052	-0.018	0.118	-0.144	0.071	0.013	0.044	-0.012	0.015
10995	hsa-miR-199a-3p/hsa-miR-199b-3p	9.201	-0.555	-0.716	-0.162	-0.623	-0.486	-0.073	-1.558	-0.973	-0.868	-0.564	-0.261
29562	hsa-miR-199a-5p	9.955	-0.842	-0.245	0.597	-0.979	-0.706	-0.359	-0.527	-0.563	0.247	-0.27	0.001
19591	hsa-miR-199b-5p	8.155	-0.472	-0.739	-0.267	-0.512	-0.432	0.068	-1.864	-0.747	-1.188	-0.491	-0.21
10997	hsa-miR-19a	9.101	-0.141	-0.243	-0.102	-0.06	-0.222	-0.012	-0.979	-0.051	-0.599	0.095	0.087
10998	hsa-miR-19b	10.193	-0.243	-0.003	0.24	-0.162	-0.325	-0.073	-0.325	0.117	-0.091	0.319	0.034
11004	hsa-miR-203	6.051	0.347	0.353	0.006	0.38	0.315	0.467	0.244	0.457	0.295	0.34	0.317
11005	hsa-miR-204	6.022	0.213	0.307	0.094	0.245	0.181	0.375	0.252	0.234	0.429	0.106	0.449
145996	hsa-miR-205*	9.058	0.178	0.026	-0.152	0.144	0.212	0.037	-0.069	0.172	-0.037	-0.066	0.117
5730	hsa-miR-208a	10.21	0.553	0.99	0.436	0.093	1.013	1.088	0.707	1.049	1.417	0.485	1.192
42555	hsa-miR-208b	13.184	0.478	0.646	0.168	0.436	0.52	0.606	0.929	0.787	0.748	0.553	0.254
145845	hsa-miR-20a	7.896	-0.068	-0.964	-0.896	0.165	-0.301	-0.393	-1.865	-0.755	-1.762	-0.587	-0.421
42640	hsa-miR-20b	7.085	-0.058	-0.793	-0.735	0.19	-0.306	-0.368	-1.385	-0.528	-1.363	-0.62	-0.494
17882	hsa-miR-20b*	6.059	0.123	0.3	0.177	0.162	0.084	0.251	0.255	0.294	0.364	0.323	0.311
147512	hsa-miR-21	9.085	-0.313	-0.411	-0.098	0.141	-0.768	-0.223	-1.22	-0.607	0.018	-0.158	-0.275
42524	hsa-miR-21*	6.242	-0.355	-0.329	0.026	-0.016	-0.694	-0.466	-0.213	-0.422	-0.016	-0.336	-0.521
145852	hsa-miR-210	8.538	-0.176	0.632	0.808	-0.092	-0.26	0.546	0.593	0.34	0.744	0.547	1.021
146179	hsa-miR-2113	6.08	-0.489	-0.058	0.431	-0.628	-0.349	-0.645	0.56	-0.379	0.84	-0.138	-0.585
146044	hsa-miR-2115	6.356	0.431	0.395	-0.036	0.485	0.377	0.416	0.22	0.498	0.393	0.386	0.456
146161	hsa-miR-2115*	9.2	0.651	0.292	-0.359	0.674	0.628	0.297	0.019	0.525	-0.198	0.43	0.677
146010	hsa-miR-2116	7.703	0.05	-0.183	-0.234	-0.123	0.224	-0.419	-0.054	-0.113	-0.116	-0.199	-0.2
11014	hsa-miR-214	9.545	-0.527	0.306	0.832	-0.622	-0.432	0	0.431	-0.011	0.862	0.181	0.372
145822	hsa-miR-214*	6.207	-0.232	-0.051	0.181	-0.202	-0.262	0.05	-0.276	-0.209	0.111	-0.05	0.067
11018	hsa-miR-218	6.547	0.218	-0.019	-0.237	0.179	0.257	0.089	-0.69	0.128	-0.469	0.256	0.574
42509	hsa-miR-219-5p	6.03	0.123	0.058	-0.065	0.204	0.042	0.22	-0.222	0.171	-0.066	0.064	0.184
11020	hsa-miR-22	13.866	0.237	0.44	0.203	0.245	0.229	0.333	0.534	0.422	0.607	0.502	0.238
42532	hsa-miR-22*	8.931	0.602	0.055	-0.547	0.507	0.697	0.688	-0.727	0.181	-0.482	0.377	0.293
11022	hsa-miR-221	9.339	1.245	-0.402	-1.647	1.424	1.067	0.224	-0.399	-0.566	-0.99	0.314	-0.993
11023	hsa-miR-222	9.535	0.837	-0.164	-1.002	1.011	0.664	0.192	0.078	-0.47	-0.415	0.214	-0.585
11024	hsa-miR-223	7.624	-1.35	-1.454	-0.104	-0.765	-1.935	-1.459	-1.545	-1.646	-1.357	-1.5	-1.218
42460	hsa-miR-223*	6.032	1.075	1.295	0.22	1.088	1.062	1.255	1.358	1.395	1.222	1.263	1.278
42566	hsa-miR-224	6.557	-0.033	-0.522	-0.489	0.211	-0.278	-0.144	-1.044	-0.538	-0.756	-0.353	-0.299
146163	hsa-miR-224*	7.015	-0.557	-0.105	0.451	-0.41	-0.703	-0.52	0.933	-0.547	0.259	-0.459	-0.299
148247	hsa-miR-2355-3p	6.78	-0.021	-0.254	-0.233	-0.098	0.055	-0.275	-0.274	-0.293	-0.098	-0.364	-0.222
42744	hsa-miR-23a	12.527	-0.082	0.152	0.234	-0.194	0.029	0.124	0.152	-0.023	0.206	0.212	0.24
42638	hsa-miR-23a*	6.611	0.828	0.88	0.052	0.959	0.697	0.823	1.002	1.013	0.866	0.722	0.854
145841	hsa-miR-23b	12.736	0.263	-0.317	-0.58	0.286	0.24	0.248	-0.98	-0.081	-0.819	-0.264	-0.006
148217	hsa-miR-23c	9.949	0.153	-0.106	-0.26	0.261	0.045	0.528	-0.588	0.297	-0.555	-0.413	0.093
17506	hsa-miR-24	12.701	0.293	-0.002	-0.295	0.262	0.323	0.412	-0.545	0.194	-0.352	0.062	0.215
146043	hsa-miR-24-1*	8.131	0.64	-0.176	-0.816	0.689	0.592	0.619	-1.008	0.144	-0.882	-0.127	0.199
42950	hsa-miR-24-2*	6.792	0.229	-0.38	-0.609	0.232	0.227	0.344	-1.064	-0.272	-0.977	-0.326	0.018
42682	hsa-miR-25	7.729	-0.417	-0.104	0.313	-0.389	-0.444	0.044	-0.213	-0.168	-0.035	-0.19	-0.062
42929	hsa-miR-25*	7.526	-0.577	-0.06	0.517	-0.794	-0.361	-0.374	0.24	-0.278	0.441	-0.163	-0.227
147198	hsa-miR-26a	9.449	0.075	-0.003	-0.078	0.146	0.005	0.482	-0.645	0.25	-0.438	0.119	0.215
146008	hsa-miR-26b	10.009	0.166	-0.936	-1.101	0.303	0.028	0.006	-2.104	-0.645	-1.716	-0.704	-0.451
42523	hsa-miR-26b*	5.934	0.288	0.314	0.026	0.341	0.236	0.449	0.196	0.315	0.185	0.367	0.373
46483	hsa-miR-27a	9.866	0.382	-0.695	-1.077	0.361	0.402	0.082	-1.887	-0.413	-1.566	-0.425	0.039
147199	hsa-miR-27b	11.02	0.461	-0.12	-0.581	0.551	0.371	0.477	-0.755	0.128	-0.517	-0.282	0.229
42823	hsa-miR-27b*	6.638	0.293	0.465	0.171	0.35	0.237	0.853	0.339	0.502	0.32	0.413	0.36
145714	hsa-miR-28-3p	6.704	0.001	0.334	0.333	0.038	-0.037	0.425	0.179	0.306	0.401	0.358	0.336
146049	hsa-miR-28-5p	6.913	0.235	-0.266	-0.501	0.327	0.143	0.3	-0.962	-0.136	-0.741	-0.129	0.072
147898	hsa-miR-2861	5.866	0.559	0.402	-0.157	0.424	0.694	0.633	0.054	0.592	-0.025	0.824	0.333
146100	hsa-miR-296-5p	7.1	1.17	1.187	0.016	1.216	1.125	1.142	1.113	1.295	1.037	1.27	1.263
46264	hsa-miR-298	6.577	-0.174	-0.253	-0.079	-0.453	0.105	-0.427	0.166	-0.201	-0.086	-0.431	-0.54
148633	hsa-miR-299-5p	9.759	-0.852	-0.536	0.316	-1.245	-0.459	-1.339	0.335	-0.835	-0.046	-0.301	-1.029
11039	hsa-miR-29a	13.005	0.159	-0.121	-0.28	0.185	0.133	0.255	-0.705	0.053	-0.454	-0.057	0.18
145638	hsa-miR-29a*	7.281	0.264	0.31	0.046	0.205	0.322	0.675	-0.142	0.316	0.04	0.488	0.482
11040	hsa-miR-29b	12.547	0.225	-0.372	-0.597	0.109	0.341	0.033	-1.016	-0.157	-0.885	-0.405	0.196
17810	hsa-miR-29b-1*	6.706	0.923	0.054	-0.869	0.8	1.047	0.138	-0.696	0.82	-0.566	0.759	-0.129
42792	hsa-miR-29b-2*	6.634	0.369	-0.021	-0.39	0.36	0.377	0.357	-0.452	0.127	-0.493	0.186	0.146
11041	hsa-miR-29c	12.392	0.37	0.096	-0.274	0.393	0.348	0.459	-0.308	0.332	-0.272	0.036	0.331
14300	hsa-miR-29c*	8.307	0.409	0.342	-0.067	0.495	0.324	0.723	-0.03	0.386	0.076	0.354	0.545
42513	hsa-miR-300	7.418	-0.323	-0.874	-0.551	-0.806	0.16	-1.136	-0.558	-0.928	-0.49	-0.95	-1.181
13143	hsa-miR-301a	7.198	0.328	-0.006	-0.334	0.368	0.288	0.388	-0.56	0.225	-0.279	-0.182	0.37
147203	hsa-miR-302a	7.849	0.279	0.243	-0.036	0.153	0.406	-0.196	0.525	0.21	0.676	0.283	-0.039
11043	hsa-miR-302b	6.591	1.34	1.392	0.051	1.432	1.249	1.499	1.293	1.581	1.306	1.227	1.444
11045	hsa-miR-302c*	6.735	0.125	0.274	0.15	0.121	0.128	0.128	0.411	0.227	0.309	0.253	0.319
27838	hsa-miR-302d	5.818	0.33	0.594	0.264	0.343	0.317	0.894	0.294	0.95	0.418	0.326	0.685
45764	hsa-miR-302e	6.167	-0.071	-0.038	0.033	-0.098	-0.045	0.205	-0.226	0.066	-0.236	-0.195	0.157
146086	hsa-miR-30a	10.698	0.597	0.129	-0.468	0.602	0.593	0.558	-0.528	0.44	-0.372	0.27	0.409
19595	hsa-miR-30a*	7.833	0.344	0.597	0.254	0.301	0.386	0.861	0.492	0.652	0.328	0.683	0.567
146112	hsa-miR-30b	11.486	0.634	-0.523	-1.157	0.66	0.609	0.356	-1.625	-0.13	-1.26	-0.359	-0.119
42923	hsa-miR-30c	11.789	0.413	-0.268	-0.68	0.519	0.307	0.363	-0.928	-0.006	-0.803	-0.19	-0.044
42702	hsa-miR-30c-1*	6.142	-0.647	-0.15	0.497	-0.673	-0.622	-0.304	0.247	-0.397	0.015	-0.19	-0.272
46626	hsa-miR-30c-2*	6.013	0.325	0.462	0.137	0.291	0.359	0.611	0.38	0.541	0.343	0.394	0.503
19596	hsa-miR-30d	11.228	0.536	0.642	0.106	0.486	0.585	0.85	0.425	0.89	0.417	0.544	0.724
17853	hsa-miR-30d*	6.228	0.512	0.621	0.109	0.431	0.593	0.799	0.543	0.721	0.462	0.604	0.599
28191	hsa-miR-30e	10.809	0.685	-0.041	-0.726	0.82	0.55	0.526	-0.982	0.405	-0.814	0.156	0.461
145676	hsa-miR-30e*	9.507	0.686	0.223	-0.463	0.749	0.622	0.801	-0.463	0.545	-0.438	0.417	0.474
147820	hsa-miR-3133	7.34	0.814	-1.108	-1.922	0.863	0.766	-0.611	-1.647	-1.037	-1.505	-1.149	-0.698
147988	hsa-miR-3135	6.2	-0.15	-0.099	0.051	-0.303	0.003	-0.372	0.129	-0.165	0.189	-0.083	-0.291
147923	hsa-miR-3142	5.984	-0.52	-0.041	0.479	-0.498	-0.542	0.063	-0.057	-0.27	0.279	0.064	-0.326
147904	hsa-miR-3148	6.583	-0.104	-0.278	-0.174	-0.235	0.026	-0.56	-0.042	-0.213	0.009	-0.416	-0.448
147806	hsa-miR-3149	7.483	-0.096	-0.332	-0.236	-0.283	0.09	-0.696	0.015	-0.258	0.015	-0.453	-0.614
147739	hsa-miR-3161	6.452	-0.092	-0.233	-0.141	-0.179	-0.006	-0.317	-0.022	-0.252	-0.02	-0.338	-0.45
147891	hsa-miR-3175	8.056	-0.058	0.534	0.592	-0.063	-0.053	0.382	0.467	0.281	0.721	0.706	0.645
147595	hsa-miR-3178	7.219	-1.034	-0.124	0.91	-1.194	-0.874	-0.636	0.224	-0.263	0.013	-0.084	0.002
147667	hsa-miR-3182	11.252	-1.056	-1.116	-0.06	-1.396	-0.715	-2.176	-0.73	-1.356	0.015	-1.185	-1.262
147805	hsa-miR-3183	6.331	-0.238	-0.431	-0.193	-0.318	-0.158	-0.479	-0.416	-0.401	-0.433	-0.409	-0.446
148000	hsa-miR-3195	6.194	-0.507	-0.241	0.266	-0.583	-0.43	-0.365	0.012	-0.362	-0.204	-0.173	-0.353
147817	hsa-miR-3196	8.51	-1.443	-0.436	1.007	-1.532	-1.353	-1.122	0.604	-0.855	0.305	-0.815	-0.73
11053	hsa-miR-32	7.266	0.568	-1.011	-1.579	0.72	0.416	-0.048	-2.312	-0.446	-2.025	-0.889	-0.346
29575	hsa-miR-32*	8.438	-0.202	-0.278	-0.076	-0.417	0.014	-0.746	0.194	-0.338	0.24	-0.413	-0.604
147851	hsa-miR-3201	6.105	-0.072	-0.374	-0.302	-0.271	0.126	-0.603	-0.223	-0.381	-0.193	-0.433	-0.413
146158	hsa-miR-3202	7.951	-1.386	-0.785	0.601	-1.712	-1.06	-1.729	0.327	-1.378	-0.712	0.397	-1.612
27533	hsa-miR-320a	9.791	-0.175	0.679	0.854	-0.166	-0.184	0.328	0.867	0.352	0.945	0.887	0.693
46324	hsa-miR-320b	9.768	-0.208	0.675	0.884	-0.23	-0.187	0.332	0.819	0.357	0.95	0.897	0.696
46228	hsa-miR-320c	9.454	-0.196	0.674	0.87	-0.227	-0.165	0.357	0.809	0.375	0.908	0.932	0.665
46870	hsa-miR-320d	9.244	-0.175	0.667	0.843	-0.258	-0.092	0.353	0.859	0.332	0.898	0.897	0.666
147691	hsa-miR-320e	9.373	-0.364	0.578	0.942	-0.491	-0.238	0.265	0.724	0.269	0.829	0.843	0.538
42457	hsa-miR-323-5p	5.996	1.184	1.418	0.234	1.142	1.226	1.41	1.513	1.474	1.366	1.298	1.45
145708	hsa-miR-324-3p	6.516	0.223	0.413	0.191	0.313	0.133	0.467	0.346	0.461	0.469	0.317	0.421
42693	hsa-miR-326	6.608	-0.234	0.159	0.393	-0.159	-0.31	-0.077	0.57	0.016	0.491	0.058	-0.103
145640	hsa-miR-328	6.455	-0.229	0.097	0.326	-0.192	-0.267	0.147	0.089	0.156	-0.016	0.095	0.107
42887	hsa-miR-331-3p	8.153	0.177	0.001	-0.176	0.335	0.019	0.378	-0.494	0.196	-0.397	-0.148	0.471
11065	hsa-miR-335	6.737	-1.114	-1.601	-0.487	-1.031	-1.198	-1.354	-2.194	-1.843	-1.142	-1.385	-1.687
145745	hsa-miR-335*	9.474	0.036	0.031	-0.005	-0.014	0.086	-0.289	0.114	0.028	0.271	0.046	0.016
42673	hsa-miR-337-3p	6.511	0.06	0.268	0.207	0.158	-0.037	0.295	0.04	0.3	0.24	0.355	0.377
17944	hsa-miR-337-5p	6.45	-0.037	0.084	0.121	0.04	-0.114	0.137	-0.411	0.121	0.023	0.325	0.31
42592	hsa-miR-338-3p	8.029	0.602	0.087	-0.514	0.735	0.469	0.637	-0.707	-0.057	0.593	0.031	0.029
17825	hsa-miR-338-5p	5.823	-0.046	0.182	0.228	-0.028	-0.064	0.184	0.106	0.057	0.544	0.034	0.166
42739	hsa-miR-339-5p	6.527	-0.508	-0.205	0.304	-0.546	-0.471	-0.016	-0.501	-0.338	-0.198	-0.128	-0.049
145859	hsa-miR-33a	7.571	0.241	0.047	-0.194	0.267	0.215	0.313	-0.66	0.023	-0.103	0.224	0.485
145950	hsa-miR-33b	6.251	-0.384	-0.055	0.329	-0.371	-0.397	0.08	-0.469	-0.277	0.187	0.165	-0.016
29872	hsa-miR-340	7.951	-0.078	0.075	0.153	-0.135	-0.021	-0.033	0.278	-0.106	0.111	0.098	0.103
32884	hsa-miR-342-3p	7.372	0.178	-0.137	-0.315	0.306	0.051	0.211	-0.603	-0.144	-0.356	0.12	-0.047
27217	hsa-miR-34a	8.13	-0.588	-0.622	-0.034	-0.578	-0.599	0.038	-1.128	-1.166	-0.518	-0.823	-0.135
148420	hsa-miR-3607-3p	9.55	0.121	0.605	0.484	0.402	-0.159	0.707	0.507	0.695	0.555	0.842	0.325
148418	hsa-miR-3607-5p	8.143	0.226	0.31	0.084	0.365	0.087	0.648	-0.081	0.452	0.06	0.578	0.204
145865	hsa-miR-361-3p	7.513	0.679	0.663	-0.016	0.696	0.662	0.593	0.6	0.717	0.464	0.917	0.685
14301	hsa-miR-361-5p	8.521	0.167	0.354	0.187	0.236	0.099	0.522	0.154	0.429	0.301	0.352	0.368
148465	hsa-miR-3611	7.17	-0.292	-0.639	-0.347	-0.568	-0.015	-1.062	-0.199	-0.747	-0.127	-0.637	-1.058
148493	hsa-miR-3613-3p	13.024	0.127	0.017	-0.11	0.129	0.124	-0.697	0.34	-0.008	0.399	0.218	-0.15
147334	hsa-miR-3613-5p	5.913	0.379	0.124	-0.255	0.435	0.322	0.293	-0.034	0.126	0.191	0.136	0.032
148413	hsa-miR-3614-3p	6.731	1.31	1.203	-0.107	1.319	1.302	1.27	1	1.335	1.077	1.113	1.424
148125	hsa-miR-3618	6.123	-0.465	-0.37	0.095	-0.521	-0.408	-0.368	-0.261	-0.525	-0.253	-0.416	-0.395
17893	hsa-miR-362-3p	5.85	-0.108	-0.506	-0.397	-0.158	-0.059	-0.028	-1.054	-0.434	-0.936	-0.359	-0.222
42503	hsa-miR-362-5p	6.436	0.41	0.627	0.216	0.454	0.367	0.663	0.551	0.628	0.625	0.594	0.699
148317	hsa-miR-3621	7.683	-1.319	-0.89	0.428	-1.544	-1.094	-1.258	-0.398	-1.195	-0.757	-0.812	-0.922
148132	hsa-miR-3622a-3p	6.723	0.417	-0.079	-0.496	0.34	0.494	0.207	-0.393	-0.115	-0.303	-0.027	0.158
11077	hsa-miR-363	6.269	-0.11	-0.119	-0.009	0.087	-0.306	-0.226	-0.282	0.341	-0.427	-0.054	-0.065
27544	hsa-miR-363*	7.238	0.082	-0.089	-0.171	0.13	0.034	0.151	-0.479	0.184	-0.345	-0.232	0.186
148481	hsa-miR-3646	9.926	0.16	0.229	0.069	0.146	0.175	0.033	0.404	0.195	0.502	0.148	0.093
148269	hsa-miR-3647-3p	8.68	-0.147	0.545	0.692	0.018	-0.311	0.687	0.305	0.361	0.741	0.761	0.416
148319	hsa-miR-3647-5p	5.932	-0.292	-0.238	0.055	-0.207	-0.378	0.137	-0.664	-0.337	-0.329	-0.043	-0.19
11078	hsa-miR-365	8.908	0.116	-0.655	-0.771	0.372	-0.139	-0.214	-1.573	-0.577	-1.042	-0.27	-0.256
148327	hsa-miR-3651	6.168	-0.248	-0.112	0.136	-0.196	-0.3	0.113	-0.533	0.03	-0.272	-0.173	0.161
148377	hsa-miR-3653	8.754	0.29	1.01	0.72	0.339	0.24	0.829	1.091	0.823	1.357	1.116	0.842
148379	hsa-miR-3654	9.104	-0.222	0.482	0.704	-0.228	-0.216	0.17	0.672	0.209	1.021	0.677	0.144
148228	hsa-miR-3656	8.544	-1.118	-0.189	0.93	-1.271	-0.965	-0.928	0.591	-0.526	0.436	-0.067	-0.637
148597	hsa-miR-3663-5p	6.407	-0.533	-0.338	0.196	-0.449	-0.618	-0.547	-0.019	-0.495	-0.036	-0.501	-0.43
148206	hsa-miR-3664-5p	5.998	0.922	0.834	-0.088	0.906	0.938	0.727	0.833	0.904	0.888	0.755	0.9
148264	hsa-miR-3665	6.073	-0.605	-0.283	0.322	-0.677	-0.532	-0.389	-0.145	-0.404	-0.203	-0.195	-0.36
148234	hsa-miR-3667-5p	8.779	0.054	-0.619	-0.673	-0.104	0.212	-0.856	-0.383	-0.654	-0.329	-0.648	-0.841
148214	hsa-miR-3675-3p	7.276	0.343	0.09	-0.254	0.226	0.461	-0.061	0.143	0.095	0.135	0.105	0.122
148410	hsa-miR-3676	9.205	0.156	0.17	0.014	0.059	0.254	0.078	0.211	0.136	0.311	0.135	0.149
148038	hsa-miR-3679-3p	8.662	1.703	1.628	-0.075	1.722	1.684	1.539	1.442	1.785	1.475	1.82	1.705
148599	hsa-miR-3680	6.979	0.996	-0.208	-1.204	0.85	1.143	-0.38	-0.381	-0.234	-0.173	-0.16	0.08
148032	hsa-miR-3685	9.111	0.806	-0.656	-1.462	0.414	1.198	-0.978	-0.407	-0.858	-0.182	-0.809	-0.704
148156	hsa-miR-3686	10.939	-0.549	-0.017	0.532	-0.627	-0.471	-0.318	0.213	-0.055	0.209	-0.039	-0.109
148085	hsa-miR-3687	6.661	-0.927	-0.699	0.228	-0.848	-1.006	-1.127	-0.271	-0.948	-0.524	-0.434	-0.891
148077	hsa-miR-3690	6.233	-0.026	-0.438	-0.412	-0.189	0.136	-0.459	-0.44	-0.432	-0.429	-0.356	-0.515
145844	hsa-miR-374a	7.757	0.315	-0.8	-1.115	0.387	0.244	0.091	-2.064	-0.588	-1.462	-0.552	-0.226
148098	hsa-miR-374b	8.706	0.147	-0.1	-0.248	0.221	0.074	0.511	-0.944	0.188	-0.541	-0.057	0.242
148430	hsa-miR-374c	8.498	0.145	-0.26	-0.405	0.224	0.065	0.323	-1.162	0.018	-0.727	-0.136	0.123
146009	hsa-miR-376a	6.157	-0.486	-0.163	0.323	-0.465	-0.507	-0.174	-0.399	-0.388	0.119	0.166	-0.305
42629	hsa-miR-376c	6.984	-0.068	0.193	0.261	0.032	-0.168	0.105	-0.185	0.056	0.412	0.452	0.32
11091	hsa-miR-377	7.19	-0.423	0.141	0.563	-0.377	-0.469	-0.008	-0.174	-0.075	0.513	0.396	0.192
148668	hsa-miR-378	12.135	0.557	0.939	0.382	0.615	0.499	0.509	0.951	1.353	0.709	1.104	1.008
11092	hsa-miR-378*	7.211	0.197	0.387	0.19	0.167	0.226	0.379	0.16	0.727	0.029	0.566	0.459
11105	hsa-miR-378/hsa-miR-378c/hsa-miR-378d	11.651	0.543	0.9	0.357	0.594	0.492	0.507	0.852	1.361	0.674	1.037	0.97
147530	hsa-miR-378b	9.629	0.503	0.797	0.294	0.54	0.466	0.487	0.71	1.174	0.516	1.031	0.866
147755	hsa-miR-378c	11.242	0.565	0.908	0.343	0.633	0.498	0.504	0.871	1.237	0.66	1.139	1.041
145832	hsa-miR-381	5.826	-0.654	-0.173	0.48	-0.673	-0.634	-0.199	-0.569	-0.273	-0.104	0.135	-0.03
145643	hsa-miR-382	5.967	0.119	0.18	0.061	0.162	0.076	0.11	0.112	0.148	0.361	0.269	0.08
148216	hsa-miR-3907	6.175	-0.161	-0.111	0.05	-0.099	-0.224	0.021	-0.111	-0.131	-0.088	-0.196	-0.161
148361	hsa-miR-3911	6.288	0.215	0.176	-0.039	0.178	0.251	0.074	0.223	0.268	0.152	0.104	0.237
148495	hsa-miR-3915	7.235	-0.376	-0.491	-0.114	-0.58	-0.173	-0.941	0.071	-0.636	-0.115	-0.6	-0.723
148049	hsa-miR-3924	6.499	0.24	0.088	-0.152	0.126	0.354	0.038	0.093	0.159	0.169	-0.041	0.113
148064	hsa-miR-3926	6.4	0.023	-0.162	-0.185	-0.199	0.245	-0.338	0.076	-0.003	-0.149	-0.279	-0.278
148265	hsa-miR-3935	7.218	0.207	-0.438	-0.645	-0.089	0.503	-0.374	-0.217	-0.523	-0.187	-0.639	-0.688
148285	hsa-miR-3941	7.686	0.662	-0.314	-0.976	0.586	0.737	-0.127	-0.579	-0.235	-0.386	-0.369	-0.19
148577	hsa-miR-3943	6.267	0.542	0.556	0.014	0.555	0.53	0.545	0.476	0.645	0.51	0.615	0.547
11104	hsa-miR-422a	9.185	0.581	0.804	0.223	0.606	0.555	0.558	0.649	1.071	0.647	1.024	0.874
42730	hsa-miR-423-3p	8.483	-0.038	0.233	0.271	0.049	-0.126	0.335	0.123	0.21	0.18	0.162	0.385
27565	hsa-miR-423-5p	9.304	-0.535	0.139	0.674	-0.622	-0.448	-0.12	0.354	-0.044	0.467	0.16	0.019
42965	hsa-miR-424	8.504	0.511	-0.083	-0.594	0.439	0.582	0.324	-0.795	0.208	-0.819	0.164	0.421
17608	hsa-miR-425	7.308	0.533	0.631	0.099	0.645	0.42	0.67	0.534	0.614	0.634	0.674	0.661
11108	hsa-miR-425*	6.025	-0.203	0.137	0.34	-0.182	-0.224	0.05	0.243	0.144	0.155	0.135	0.094
147631	hsa-miR-4258	7.524	0.658	0.773	0.115	0.689	0.628	0.632	0.699	0.833	0.613	1.086	0.775
147942	hsa-miR-4268	9.864	-0.68	-1.738	-1.058	-1.397	0.036	-2.22	-0.654	-2.43	-0.905	-1.738	-2.48
147751	hsa-miR-4274	6.907	1.462	1.584	0.123	1.575	1.349	1.561	1.511	1.73	1.519	1.503	1.683
147743	hsa-miR-4275	7.87	0.183	0.124	-0.059	0.226	0.14	0.391	-0.13	0.193	-0.007	0.138	0.159
147767	hsa-miR-4279	10.917	-0.361	-1.887	-1.526	-1.2	0.478	-2.163	-0.942	-2.482	-1.267	-1.951	-2.52
147636	hsa-miR-4284	13.871	0.921	-0.677	-1.598	0.739	1.103	0.314	-1.879	-0.559	-1.883	-0.082	0.029
147604	hsa-miR-4285	9.828	-1.555	-0.65	0.905	-1.742	-1.368	-1.491	0.406	-1.277	0.003	-0.614	-0.929
147744	hsa-miR-4286	14.095	0.021	0.282	0.26	0.104	-0.062	0.249	0.26	0.502	0.212	0.204	0.262
147588	hsa-miR-4288	9.97	1.178	-0.256	-1.433	1.399	0.956	0.158	0.231	-0.543	-0.67	0.515	-1.224
147735	hsa-miR-4289	7.66	-0.037	-0.387	-0.35	0.021	-0.094	0.005	-1.026	-0.184	-0.795	-0.414	0.093
147920	hsa-miR-4290	9.46	-1.095	-1.628	-0.534	-1.747	-0.442	-2.21	-0.492	-2.491	-0.752	-1.727	-2.098
147616	hsa-miR-4291	10.309	-0.015	0.287	0.303	-0.033	0.002	0.291	0.213	0.317	0.288	0.309	0.307
147600	hsa-miR-4292	6.374	0.222	0.358	0.137	0.203	0.241	0.18	0.443	0.397	0.247	0.547	0.337
147632	hsa-miR-4297	6.211	-0.087	-0.396	-0.309	-0.164	-0.011	-0.474	-0.409	-0.438	-0.299	-0.355	-0.401
147614	hsa-miR-4299	8.496	-0.337	0.061	0.398	-0.496	-0.179	-0.39	0.342	0.023	0.191	0.313	-0.113
147861	hsa-miR-4301	12.757	-0.064	0.544	0.608	0.077	-0.204	0.284	0.686	0.543	0.803	0.256	0.696
147722	hsa-miR-4306	9.341	-0.788	-0.385	0.403	-1.005	-0.571	-0.989	0.178	-0.711	-0.325	0.193	-0.657
147947	hsa-miR-4308	6.228	-0.189	-0.377	-0.188	-0.259	-0.118	-0.349	-0.263	-0.479	-0.37	-0.388	-0.414
147907	hsa-miR-4312	6.539	0.571	0.642	0.071	0.566	0.576	0.56	0.579	0.719	0.566	0.703	0.724
147776	hsa-miR-4317	8.71	0.294	-0.234	-0.528	0.296	0.293	0.382	-0.952	-0.083	-0.735	-0.124	0.109
147671	hsa-miR-4323	6.131	0.327	0.382	0.056	0.48	0.173	0.339	0.311	0.433	0.413	0.298	0.5
147847	hsa-miR-4324	8.779	-0.386	-0.239	0.148	-0.373	-0.4	0.037	-0.296	-0.465	-0.247	-0.239	-0.223
147771	hsa-miR-4328	10.758	-0.178	-0.011	0.167	-0.222	-0.133	0.086	-0.473	0.036	0.103	0.016	0.168
147926	hsa-miR-4329	7.443	-0.199	-0.154	0.045	-0.233	-0.165	-0.034	-0.244	-0.229	-0.068	-0.17	-0.177
18847	hsa-miR-450a	6.722	0.731	0.659	-0.072	0.727	0.735	0.922	0.382	0.867	0.372	0.624	0.789
42866	hsa-miR-451	10.696	-5.736	-3.424	2.311	-4.991	-6.48	-3.387	-3.1	-3.537	-4.496	-2.916	-3.109
29379	hsa-miR-452	7.403	-0.151	0.33	0.482	0.282	-0.584	0.16	0.437	0.182	0.875	0.239	0.09
28950	hsa-miR-455-3p	5.958	0.134	-0.51	-0.644	0.167	0.101	-0.018	-0.951	-0.369	-0.922	-0.6	-0.202
13179	hsa-miR-455-5p	6.574	0.276	0.368	0.092	0.306	0.247	0.561	0.173	0.53	0.208	0.273	0.462
148682	hsa-miR-483-3p	10.676	-0.573	-1.734	-1.161	-1.347	0.201	-2.158	-0.713	-2.334	-0.903	-1.782	-2.515
42654	hsa-miR-483-5p	7.388	-1.221	-0.337	0.884	-1.389	-1.052	-0.956	0.042	-0.715	0.002	0.075	-0.47
145753	hsa-miR-484	6.844	0.359	0.37	0.011	0.473	0.245	0.416	0.34	0.389	0.295	0.323	0.457
42694	hsa-miR-485-3p	6.714	-0.693	-0.611	0.082	-0.763	-0.623	-1.045	-0.212	-0.754	-0.308	-0.572	-0.774
42480	hsa-miR-485-5p	6.046	0.937	1.186	0.249	0.93	0.943	1.123	1.168	1.217	1.166	1.154	1.286
32946	hsa-miR-486-5p	8.651	-0.012	0.256	0.268	0.042	-0.065	-0.034	0.186	0.383	-0.073	0.955	0.121
14285	hsa-miR-487b	8.978	-0.018	0.153	0.171	0.02	-0.057	0.179	-0.051	0.215	0.166	0.079	0.328
42704	hsa-miR-488	6.164	0.118	0.08	-0.038	0.011	0.225	0.139	0.135	0.18	-0.014	0.123	-0.082
42703	hsa-miR-490-3p	7.172	-0.244	0.037	0.281	-0.337	-0.15	-0.239	0.314	0.324	0.143	-0.181	-0.137
17822	hsa-miR-490-5p	6.547	0.324	0.599	0.276	0.46	0.187	0.561	0.587	0.919	0.521	0.414	0.592
147701	hsa-miR-491-3p	12.84	-1.022	-1.328	-0.306	-1.209	-0.835	-1.301	-1.273	-1.398	-1.031	-1.469	-1.497
147953	hsa-miR-491-5p	6.287	-0.097	0.059	0.157	-0.118	-0.077	0.266	-0.006	0.18	0.021	0.011	-0.114
42661	hsa-miR-492	5.984	-0.909	-0.389	0.52	-0.977	-0.841	-0.526	-0.369	-0.549	-0.227	-0.302	-0.361
42847	hsa-miR-497	8.058	-0.563	0.056	0.619	-0.518	-0.609	0.183	-0.118	-0.358	0.332	-0.171	0.469
42442	hsa-miR-498	7.849	-0.658	-0.026	0.632	-0.845	-0.471	-0.547	0.566	-0.275	0.457	-0.088	-0.266
145692	hsa-miR-499-3p	8.814	0.519	-0.394	-0.913	0.883	0.155	0.723	-0.125	0.997	-0.136	-2.049	-1.772
14313	hsa-miR-499-5p	12.043	0.597	0.123	-0.475	0.627	0.568	0.498	-0.348	0.525	-0.421	0.185	0.296
17875	hsa-miR-500a	6.176	0.332	0.484	0.152	0.415	0.249	0.536	0.492	0.496	0.457	0.417	0.506
46406	hsa-miR-500a*	6.217	0.214	0.338	0.124	0.236	0.192	0.456	0.199	0.347	0.306	0.309	0.412
145675	hsa-miR-501-5p	6.681	-0.033	0.74	0.773	-0.025	-0.042	0.14	1.55	0.36	1.596	0.461	0.331
146178	hsa-miR-502-3p	6.078	-0.125	0.08	0.205	-0.176	-0.074	0.25	-0.04	0.067	0.109	0.048	0.049
42490	hsa-miR-505*	6.941	0.394	0.594	0.2	0.399	0.389	0.439	0.63	0.747	0.691	0.505	0.551
42812	hsa-miR-508-5p	6.195	-0.196	0.147	0.342	-0.142	-0.249	0.073	0.306	0.13	0.248	0.022	0.102
42581	hsa-miR-513a-5p	9.179	-0.499	0.533	1.032	-0.744	-0.254	-0.197	0.986	0.468	1.18	0.613	0.149
46789	hsa-miR-513b	6.664	0.704	1.147	0.443	0.764	0.644	0.828	1.33	1.15	1.456	1.065	1.055
11151	hsa-miR-516b	6.544	-0.028	-0.144	-0.116	-0.248	0.192	-0.341	0.09	-0.051	0.003	-0.202	-0.36
148641	hsa-miR-518b	6.289	0.201	-0.556	-0.757	-0.15	0.551	-0.498	-0.449	-0.693	-0.575	-0.559	-0.564
13137	hsa-miR-518e*/hsa-miR-519a*/hsa-miR-519b-5p/hsa-miR-519c-5p/hsa-miR-522*/hsa-miR-523*	6.909	-0.955	-0.541	0.414	-1.039	-0.871	-0.814	-0.034	-0.878	-0.321	-0.56	-0.642
46221	hsa-miR-519d	6.422	0.176	0.324	0.148	0.299	0.052	0.328	0.323	0.4	0.372	0.185	0.336
11164	hsa-miR-519e	6.765	0.109	0.2	0.091	0.166	0.051	0.418	0.1	0.106	0.157	0.162	0.255
13132	hsa-miR-519e*	7.454	-0.592	-0.168	0.424	-0.574	-0.61	-0.326	0.145	-0.372	0.066	-0.259	-0.26
11175	hsa-miR-525-5p	7.43	-0.411	-0.276	0.134	-0.486	-0.335	-0.318	-0.046	-0.638	-0.083	-0.136	-0.437
42732	hsa-miR-532-3p	5.967	0.198	0.214	0.016	0.205	0.191	0.189	0.14	0.2	0.349	0.153	0.254
17624	hsa-miR-532-5p	5.882	-0.217	-0.026	0.192	-0.141	-0.294	0.102	-0.166	-0.09	-0.006	0.022	-0.016
14272	hsa-miR-542-3p	6.747	0.32	0.271	-0.049	0.165	0.474	0.499	-0.001	0.473	-0.11	0.335	0.429
42811	hsa-miR-542-5p	6.205	-0.21	0.187	0.397	-0.259	-0.162	0.191	0.274	0.222	0.184	0.156	0.095
46705	hsa-miR-548k	5.937	-0.436	-0.066	0.37	-0.396	-0.476	-0.248	0.16	-0.214	0.148	0.024	-0.266
147584	hsa-miR-548t	5.807	-0.278	-0.092	0.186	-0.349	-0.206	-0.288	0.191	-0.222	0.26	-0.124	-0.366
145789	hsa-miR-550a	6.582	-0.083	0.355	0.438	-0.061	-0.105	0.357	0.275	0.171	0.544	0.537	0.248
17272	hsa-miR-551a	6.55	-0.183	-0.075	0.108	-0.328	-0.038	-0.1	0.08	-0.161	0.046	-0.069	-0.244
148644	hsa-miR-551b	5.938	0.08	0.005	-0.075	0.054	0.105	0.262	-0.406	0.235	-0.408	0.28	0.066
42781	hsa-miR-551b*	6.378	-0.515	-0.321	0.194	-0.565	-0.465	-0.716	0.039	-0.149	-0.074	-0.461	-0.564
17668	hsa-miR-552	5.936	-0.326	0.279	0.605	-0.362	-0.289	-0.068	0.871	0.096	0.827	0.068	-0.118
28966	hsa-miR-574-3p	7.676	0.32	-0.113	-0.434	0.186	0.455	0.034	-0.365	-0.35	-0.103	0.068	0.035
27740	hsa-miR-574-5p	7.972	-0.103	-0.038	0.065	-0.271	0.066	-0.354	0.18	-0.178	0.459	-0.09	-0.242
42446	hsa-miR-576-5p	6.368	0.359	0.466	0.107	0.445	0.273	0.501	0.425	0.58	0.38	0.308	0.6
145647	hsa-miR-584	6.848	0.132	0.406	0.274	0.106	0.157	0.262	0.331	0.292	0.484	0.637	0.432
17546	hsa-miR-585	6.898	-0.7	-0.072	0.628	-0.858	-0.542	-0.467	0.354	-0.342	0.292	-0.074	-0.197
42542	hsa-miR-589	6.892	0.032	0.092	0.061	-0.045	0.108	0.213	-0.081	-0.217	0.101	0.184	0.354
17503	hsa-miR-590-5p	6.38	0.439	-0.301	-0.74	0.521	0.356	0.352	-1.044	-0.05	-0.882	-0.299	0.117
42504	hsa-miR-593	6.068	1.081	1.24	0.16	1.052	1.11	1.271	1.242	1.218	1.208	1.233	1.27
42818	hsa-miR-597	6.531	0.038	0.052	0.014	0.057	0.018	0.233	-0.016	0.054	-0.052	-0.015	0.105
17377	hsa-miR-600	9.006	0.991	0.119	-0.872	0.863	1.119	0.723	-0.645	0.354	-0.596	0.322	0.555
17498	hsa-miR-601	6.114	0.466	0.493	0.028	0.482	0.449	0.321	0.474	0.837	0.424	0.307	0.597
145736	hsa-miR-605	6.256	-0.614	-0.167	0.447	-0.526	-0.701	-0.45	0.91	-0.624	-0.083	-0.548	-0.206
27672	hsa-miR-615-3p	6.057	-0.417	-0.533	-0.116	-0.398	-0.436	-0.549	-0.373	-0.64	-0.526	-0.509	-0.6
17336	hsa-miR-618	6.266	1.017	1.196	0.179	1.065	0.969	1.226	1.188	1.276	1.181	1.075	1.229
148652	hsa-miR-620	6.62	0.236	-0.437	-0.672	0.056	0.415	-0.514	-0.399	-0.378	-0.351	-0.611	-0.367
145740	hsa-miR-625*	8.189	-0.545	-0.646	-0.101	-0.875	-0.215	-0.962	-0.247	-0.978	-0.284	-0.499	-0.905
148684	hsa-miR-628-3p	5.921	-0.183	-0.251	-0.067	-0.245	-0.122	-0.181	-0.215	-0.331	-0.158	-0.303	-0.316
17961	hsa-miR-629	6.035	0.505	0.657	0.153	0.583	0.426	0.579	0.649	0.719	0.611	0.651	0.735
17566	hsa-miR-629*	6.889	0.164	0.23	0.066	0.155	0.172	0.439	0.13	0.121	0.322	0.173	0.193
17327	hsa-miR-630	6.307	-0.269	-0.397	-0.129	-0.384	-0.154	-0.636	-0.13	-0.512	-0.179	-0.342	-0.585
42591	hsa-miR-634	9.033	0.028	-0.46	-0.488	-0.328	0.385	-0.479	-0.411	-0.581	-0.331	-0.47	-0.487
42750	hsa-miR-636	5.876	0.39	0.37	-0.021	0.477	0.304	0.347	0.313	0.477	0.301	0.331	0.449
42832	hsa-miR-638	8.373	-0.703	0.113	0.816	-0.816	-0.59	-0.454	0.655	-0.246	0.66	0.137	-0.077
148396	hsa-miR-642b	8.35	-1.762	-0.941	0.82	-1.893	-1.631	-1.437	-0.244	-1.627	-0.421	-0.474	-1.445
42746	hsa-miR-647	6.517	0.542	0.081	-0.461	0.375	0.71	0.028	0.093	0.161	0.036	0.063	0.104
17394	hsa-miR-651	6.276	1.035	1.17	0.135	1.11	0.96	1.434	1.065	1.286	1.054	1.021	1.16
42827	hsa-miR-652	7.81	0.216	0.162	-0.054	0.338	0.095	0.476	-0.025	0.112	-0.056	0.437	0.03
21498	hsa-miR-654-3p	5.883	-0.009	0.126	0.135	0.059	-0.077	0.208	-0.056	0.089	0.107	0.202	0.206
17460	hsa-miR-657	5.876	0.064	-0.302	-0.366	-0.112	0.239	-0.045	-0.438	-0.349	-0.457	-0.312	-0.21
42749	hsa-miR-659	7.636	-0.334	-0.168	0.166	-0.291	-0.377	-0.566	-0.007	-0.011	-0.377	0.319	-0.365
17338	hsa-miR-660	6.212	0.267	-0.106	-0.372	0.28	0.253	0.356	-0.546	-0.076	-0.465	-0.045	0.142
42807	hsa-miR-663	6.018	-0.107	0.229	0.336	-0.119	-0.094	0.234	0.321	0.322	0.17	0.245	0.083
145973	hsa-miR-664	8.186	0.051	0.113	0.062	-0.037	0.138	-0.094	0.191	0.021	0.308	0.153	0.098
46829	hsa-miR-664*	5.943	0.11	0.221	0.111	0.105	0.115	0.282	0.096	0.213	0.349	0.12	0.267
145768	hsa-miR-665	7.908	-1.509	-0.792	0.717	-1.856	-1.162	-1.918	0.006	-1.451	0.622	-0.574	-1.438
145701	hsa-miR-668	6.757	0.048	-0.253	-0.301	0.04	0.056	-0.057	-0.653	-0.085	-0.495	-0.269	0.043
42761	hsa-miR-675	7.476	-1.501	-0.744	0.757	-1.59	-1.413	-1.295	-0.007	-1.195	-0.811	-0.062	-1.095
42859	hsa-miR-675*	5.98	0.592	0.467	-0.125	0.575	0.609	0.547	0.289	0.165	0.628	0.552	0.62
148118	hsa-miR-676*	6.849	0.005	-0.011	-0.015	-0.395	0.405	0.605	-0.036	-0.792	-0.057	0.133	0.083
29490	hsa-miR-7	6.623	0.315	0.164	-0.151	0.336	0.295	0.097	0.077	0.301	0.287	0.13	0.095
42964	hsa-miR-7-2*	5.801	-0.276	-0.097	0.18	-0.264	-0.288	-0.506	0.344	-0.289	0.338	-0.149	-0.318
29190	hsa-miR-708	6.004	-0.231	-0.184	0.047	-0.147	-0.316	0.035	-0.593	-0.086	-0.297	-0.247	0.084
146196	hsa-miR-711	6.34	-0.733	-0.31	0.423	-0.8	-0.666	-0.709	0.005	-0.387	0.074	-0.363	-0.483
146064	hsa-miR-718	6.951	1.545	1.725	0.18	1.648	1.443	1.639	1.653	1.734	1.777	1.714	1.835
148679	hsa-miR-720	15.028	-0.141	-0.02	0.121	-0.064	-0.218	-0.222	0.108	-0.009	0.039	-0.055	0.019
27568	hsa-miR-744	8.642	0.156	-0.268	-0.424	-0.551	0.864	-0.625	0.258	-0.67	0.43	-0.392	-0.611
146111	hsa-miR-767-5p	8.15	0.089	0.586	0.497	0.145	0.032	0.574	0.733	0.413	0.733	0.437	0.623
32891	hsa-miR-769-5p	5.864	0.018	0.295	0.277	0.03	0.006	0.214	0.255	0.437	0.349	0.172	0.344
42808	hsa-miR-874	6.82	-0.378	0.191	0.569	-0.332	-0.424	0.057	0.275	0.122	0.35	0.05	0.29
28884	hsa-miR-876-3p	5.644	0.601	-0.187	-0.788	0.496	0.707	-0.132	-0.621	0.209	-0.543	0.363	-0.399
30033	hsa-miR-877	6.877	-0.126	-0.07	0.056	-0.356	0.105	-0.378	0.184	-0.12	0.059	-0.085	-0.08
148622	hsa-miR-877*	8.046	-0.16	-0.856	-0.696	-0.685	0.365	-1.203	-0.411	-1.03	-0.38	-0.956	-1.156
46259	hsa-miR-885-5p	6.472	1.062	1.164	0.101	1.094	1.031	0.973	1.172	1.24	1.255	1.128	1.214
27961	hsa-miR-891a	6.454	-0.365	-0.279	0.085	-0.443	-0.286	-0.301	-0.118	-0.497	-0.11	-0.152	-0.497
148621	hsa-miR-892a	6.012	0.407	0.276	-0.131	0.395	0.419	0.222	0.298	0.338	0.232	0.224	0.342
42932	hsa-miR-920	6.628	-0.107	-0.111	-0.004	-0.25	0.037	-0.417	0.192	-0.145	0.189	-0.215	-0.267
46507	hsa-miR-921	6.19	0.146	0.357	0.21	0.196	0.096	0.196	0.684	0.4	0.417	0.212	0.231
145693	hsa-miR-92a	8.761	-0.239	0.03	0.269	-0.117	-0.36	0.081	-0.282	0.108	-0.164	0.288	0.151
145897	hsa-miR-92b	6.597	-0.502	-0.286	0.216	-0.394	-0.611	-0.132	-0.479	-0.413	-0.358	-0.137	-0.197
30687	hsa-miR-93	8.245	-0.349	-0.024	0.324	-0.252	-0.445	-0.004	-0.074	-0.036	-0.047	-0.107	0.123
17863	hsa-miR-934	6.316	0.012	-0.16	-0.172	-0.122	0.146	-0.317	-0.022	-0.147	0.039	-0.311	-0.199
42514	hsa-miR-937	7.715	0.334	0.29	-0.044	0.186	0.483	0.593	0.347	-0.032	-0.067	0.464	0.436
146115	hsa-miR-940	6.05	0.371	0.354	-0.017	0.428	0.314	0.354	0.218	0.395	0.176	0.444	0.539
42696	hsa-miR-943	7.86	-0.475	-0.134	0.342	-0.63	-0.321	-0.701	0.533	-0.375	0.098	-0.012	-0.345
13147	hsa-miR-96	6.036	0.243	0.259	0.016	0.295	0.191	0.277	0.194	0.362	0.117	0.178	0.426
11182	hsa-miR-98	9.361	-0.038	-0.37	-0.332	-0.005	-0.071	0.11	-0.995	-0.107	-0.909	-0.317	-0.004
42708	hsa-miR-99a	9.7	-0.12	-0.214	-0.094	0.004	-0.244	0.177	-0.862	-0.073	-0.449	-0.093	0.016
145651	hsa-miR-99a*	6.061	0.079	-0.089	-0.168	0.144	0.014	0.318	-0.524	-0.087	-0.26	0.01	0.009
11184	hsa-miR-99b	8.734	0.054	0.135	0.081	0.139	-0.031	0.428	-0.089	0.216	0.048	-0.061	0.267
17898	hsa-miR-99b*	7.504	0.086	0.489	0.402	0.131	0.042	0.226	0.969	0.299	0.742	0.387	0.309
28302	hsa-miRPlus-A1015	10.05	-0.037	0.854	0.891	0.039	-0.113	0.661	0.997	0.626	1.202	1.166	0.472
42780	hsa-miRPlus-A1065	6.788	-0.392	-0.208	0.184	-0.538	-0.245	-0.147	-0.555	-0.011	-0.43	0.004	-0.11
42793	hsa-miRPlus-A1072	7.813	-0.487	-0.3	0.188	-0.644	-0.33	-0.691	0.365	-0.53	-0.041	-0.435	-0.467
17858	hsa-miRPlus-A1073	6.977	1.499	1.543	0.045	1.528	1.469	1.444	1.48	1.632	1.506	1.53	1.67
145956	hsa-miRPlus-A1083	6.924	0.344	0.914	0.57	0.352	0.336	0.754	0.881	0.922	1.001	0.962	0.963
17885	hsa-miRPlus-A1086	7.081	-1.038	-1.925	-0.887	-1.456	-0.621	-1.292	-2.113	-2.039	-2.075	-2.182	-1.85
17848	hsa-miRPlus-A1087	7.776	-0.753	-1.009	-0.255	-1.23	-0.276	-0.468	-1.661	-0.75	-1.365	-1.211	-0.596
17653	hsa-miRPlus-C1049	9.585	0.99	1.032	0.041	0.793	1.188	1.042	0.678	1.364	0.668	1.344	1.093
42838	hsa-miRPlus-C1076	6.167	-0.088	0.089	0.177	-0.065	-0.112	-0.05	0.247	-0.036	0.219	0.198	-0.045
17841	hsa-miRPlus-C1100	5.932	0.409	0.385	-0.024	0.407	0.411	0.408	0.155	0.333	0.373	0.483	0.558
17955	hsa-miRPlus-C1110	7.268	-0.6	-0.016	0.583	-0.48	-0.719	-0.354	0.899	-0.345	0.283	-0.333	-0.248
145933	hsa-miRPlus-C1115	6.783	-0.424	0.562	0.986	-0.44	-0.409	-0.094	1.49	0.111	1.493	0.387	-0.014
146166	hsa-miRPlus-G1065-5p	5.842	-0.041	-0.005	0.036	-0.412	0.33	-0.123	0.387	-0.08	-0.066	0.035	-0.183
146113	hsa-miRPlus-G1246-3p	6.632	-0.205	0.063	0.268	-0.204	-0.206	0.106	-0.13	0.069	0.106	0.148	0.081
147536	hsa-miRPlus-I107*	5.919	0.16	-0.04	-0.2	0.1	0.219	0.243	-0.249	0.019	-0.292	-0.044	0.083
148504	hsa-miRPlus-I874*	6.57	0.154	0.173	0.019	0.148	0.16	0.176	0.082	0.224	0	0.308	0.249
147975	hsa-miRPlus-J1003	6.153	0.303	0.116	-0.186	0.225	0.381	0.041	0.181	0.109	0.22	0.086	0.06
147415	hsa-miRPlus-J1011	6.366	-0.429	-0.554	-0.125	-0.642	-0.215	-0.651	-0.389	-0.566	-0.371	-0.594	-0.752
147280	hsa-miRPlus-J1185-1*	6.618	1.233	1.363	0.13	1.211	1.255	1.229	1.395	1.412	1.411	1.305	1.428
42502	hsa-miRPlus-J204*	8.352	-0.396	0.021	0.417	-0.542	-0.249	-0.631	0.513	-0.046	0.421	0.222	-0.353
147576	hsv1-miR-H1*	6.047	0.691	0.723	0.032	0.757	0.626	0.665	0.668	0.778	0.686	0.727	0.816
147889	hsv1-miR-H14-3p	5.997	-0.143	0.098	0.241	-0.154	-0.131	-0.039	0.176	-0.012	0.174	0.149	0.14
147804	hsv1-miR-H17	6.541	-0.331	-0.101	0.23	-0.728	0.065	-0.42	0.291	-0.467	0.352	0.014	-0.379
146058	hsv1-miR-H3	6.145	1.258	1.345	0.087	1.348	1.168	1.265	1.331	1.318	1.312	1.331	1.515
146159	hsv1-miR-H4*	8.369	-0.4	-0.416	-0.016	-0.379	-0.421	-0.292	-0.635	-0.4	-0.532	-0.476	-0.164
146098	hsv1-miR-H5-3p	6.894	0.787	-0.359	-1.146	0.58	0.994	0.337	-0.699	-0.278	-0.824	-0.412	-0.279
146117	hsv1-miR-H6-3p	10.232	-0.632	-0.657	-0.025	-1.211	-0.053	-1.379	0.147	-1.063	-0.07	-0.575	-1.001
146090	hsv1-miR-H7*	8.991	-2.649	-1.595	1.054	-2.875	-2.423	-2.851	-0.131	-2.494	-1.196	-0.977	-1.921
146042	hsv1-miR-H8*	7.529	0.71	0.745	0.035	0.704	0.716	0.575	0.643	0.776	0.537	1.037	0.903
147803	hsv2-miR-H10	8.638	-1.489	-0.334	1.155	-1.624	-1.354	-1.224	0.648	-0.764	0.207	0.008	-0.88
147738	hsv2-miR-H20	7.121	0.431	0.002	-0.429	0.285	0.577	0.306	-0.292	-0.047	-0.342	0.17	0.218
147864	hsv2-miR-H24	6.738	0.682	0.549	-0.133	0.725	0.639	0.495	0.438	0.659	0.433	0.674	0.593
147884	hsv2-miR-H25	8.382	-1.603	-0.707	0.895	-1.736	-1.47	-1.449	0.31	-1.365	-0.22	-0.614	-0.907
147900	hsv2-miR-H6*	7.931	-0.533	-0.711	-0.178	-0.687	-0.38	-1.088	-0.408	-0.759	-0.412	-0.815	-0.782
147790	hsv2-miR-H7-3p	8.512	-2.306	-1.441	0.864	-2.498	-2.113	-2.41	-0.057	-2.24	-0.971	-1.059	-1.912
147836	hsv2-miR-H7-5p	5.963	-0.082	0.151	0.233	-0.099	-0.065	-0.06	0.393	-0.069	0.325	0.232	0.082
147840	hsv2-miR-H9-3p	6.311	-0.523	-0.47	0.053	-0.597	-0.45	-0.539	-0.624	-0.497	-0.259	-0.43	-0.47
42656	kshv-miR-K12-10a	7.094	1.541	1.601	0.06	1.633	1.449	1.559	1.549	1.668	1.458	1.632	1.738
42624	kshv-miR-K12-10b	6.793	1.503	1.53	0.027	1.571	1.436	1.492	1.467	1.4	1.539	1.599	1.684
147919	kshv-miR-K12-12	6.249	-0.606	-0.003	0.603	-0.646	-0.566	-0.41	0.479	-0.155	0.107	0.077	-0.115
42795	kshv-miR-K12-3	7.318	-0.805	-0.244	0.561	-0.997	-0.612	-0.559	0.258	-0.564	0.181	-0.301	-0.478
147885	kshv-miR-K12-5*	8.321	-0.37	-0.246	0.124	-0.379	-0.361	-0.387	-0.003	-0.338	0.181	-0.537	-0.394
17488	kshv-miR-K12-6-3p	8.766	0.006	-0.638	-0.643	-0.905	0.916	-1.356	0.322	-1.137	0.34	-0.671	-1.324
19011	SNORD10	8.721	-0.122	-0.046	0.076	0.028	-0.273	0.345	-0.756	-0.111	-0.141	0.231	0.156
19005	SNORD118	8.207	-0.564	0.138	0.702	-0.591	-0.536	0.122	-0.446	0.045	0.717	0.604	-0.213
19606	SNORD12	6.42	0.076	0.027	-0.049	0.241	-0.088	0.226	-0.224	0.033	0.017	-0.007	0.116
19603	SNORD13	8.346	0.275	-0.068	-0.343	0.38	0.17	0.384	-0.613	0.026	-0.111	0.274	-0.37
19013	SNORD14B	6.315	0.121	-0.102	-0.223	0.285	-0.042	0.097	-0.387	-0.028	-0.108	-0.15	-0.034
19008	SNORD2	9.52	-0.035	0.071	0.107	0.107	-0.178	0.339	-0.279	0.134	-0.184	0.274	0.143
19007	SNORD3@	10.185	-0.432	-0.256	0.176	-0.537	-0.327	-0.627	-0.252	-0.507	-0.114	0.224	-0.261
46204	SNORD38B	8.4	-0.018	-0.283	-0.265	0.152	-0.189	0.298	-1.196	-0.16	-0.633	-0.017	0.009
46206	SNORD44	7.639	-0.123	-0.692	-0.569	0.169	-0.416	-0.118	-1.439	-0.721	-1.074	-0.326	-0.476
46205	SNORD48	8.692	-0.061	0.015	0.076	0.084	-0.207	0.298	-0.29	-0.09	-0.201	0.278	0.096
46203	SNORD49A	7.1	-0.097	-0.586	-0.49	0.019	-0.212	0.018	-1.511	-0.521	-1.058	-0.16	-0.287
19604	SNORD4A	8.841	-0.177	0.427	0.604	-0.063	-0.291	0.458	0.161	0.255	0.742	0.556	0.392
19605	SNORD6	9.357	-0.18	0.618	0.798	-0.072	-0.288	0.486	0.549	0.41	1.038	0.938	0.286
145663	SNORD65	10.818	-0.396	0.208	0.604	-0.324	-0.468	0.217	-0.062	0.024	0.532	0.397	0.141
145666	SNORD68	7.342	0.202	0.068	-0.134	0.261	0.144	0.318	-0.294	0.072	-0.061	0.21	0.166
17492	sv40-miR-S1-5p	9.135	-2.15	-0.987	1.163	-2.288	-2.012	-2.221	0.293	-1.901	-0.72	0.439	-1.808
